# Supplementary material
Source: publisher figshare collection journal article supplement (https://gsapubs.figshare.com/articles/dataset/_/16942972)
Supplement: Supplementary file 1 [file 1]

This Supplemental Material accompanies Ortega-Flores, B., Solari, L.A., Martini, M., and Ortega-Obregón, C., 2020, The Guerrero terrane, a para-autochthonous block on the paleo-Pacific continental margin of North America: Evidence from zircon U-Pb dating and Hf isotopes, *in* Martens, U.C., and Molina Garza, R.S., eds., Southern and Central Mexico: Basement Framework, Tectonic Evolution, and Provenance of Mesozoic–Cenozoic Basins: Geological Society of America Special Paper 546, p. 1–XXX, [https://doi.org/10.1130/2020.2546\(08\)](https://doi.org/10.1130/2020.2546(08)).

**Table S1: Results of U-Pb geochronology**

| ISOTOPE RATIOS <sup>2</sup> |                      |                       |      |                                      |        |                                     |        |                                     |         |                                      |         |           | CORRECTED AGES (Ma)                |      |                                     |      |                                      |      |               |      |        |
|-----------------------------|----------------------|-----------------------|------|--------------------------------------|--------|-------------------------------------|--------|-------------------------------------|---------|--------------------------------------|---------|-----------|------------------------------------|------|-------------------------------------|------|--------------------------------------|------|---------------|------|--------|
| Sample                      | U (ppm) <sup>1</sup> | Th (ppm) <sup>1</sup> | Th/U | <sup>207</sup> Pb/ <sup>206</sup> Pb | ±2SE % | <sup>207</sup> Pb/ <sup>235</sup> U | ±2SE % | <sup>206</sup> Pb/ <sup>238</sup> U | ±2SE %  | <sup>208</sup> Pb/ <sup>232</sup> Th | ±2SE %  | Rho       | <sup>206</sup> Pb/ <sup>38</sup> U | ±2SE | <sup>207</sup> Pb/ <sup>235</sup> U | ±2SE | <sup>207</sup> Pb/ <sup>208</sup> Pb | ±2SE | Best age (Ma) | ±2SE | Disc % |
| Charcas Formation CH14-1    |                      |                       |      |                                      |        |                                     |        |                                     |         |                                      |         |           |                                    |      |                                     |      |                                      |      |               |      |        |
| Zircon-001_CH14-            | 784                  | 48.1                  | 0.06 | 0.0561                               | 0.0022 | 0.551                               | 0.021  | 0.0708                              | 0.0011  | 0.0235                               | 0.0015  | -0.20862  | 441                                | 6.7  | 445                                 | 14   | 462                                  | 54   | 441           | 7    | 0.90   |
| Zircon-002                  | 118.5                | 36.2                  | 0.31 | 0.0525                               | 0.0048 | 0.302                               | 0.026  | 0.0423                              | 0.0011  | 0.0134                               | 0.0011  | -0.15938  | 266.8                              | 6.6  | 265                                 | 20   | 510                                  | 110  | 267           | 7    | -0.68  |
| Zircon-003                  | 83.8                 | 76.8                  | 0.92 | 0.0693                               | 0.0031 | 1.647                               | 0.07   | 0.1675                              | 0.0033  | 0.0511                               | 0.0029  | 0.4968    | 998                                | 18   | 986                                 | 28   | 902                                  | 64   | 998           | 18   | -1.22  |
| Zircon-004                  | 312.6                | 289.5                 | 0.93 | 0.0518                               | 0.0027 | 0.28                                | 0.013  | 0.0396                              | 0.0008  | 0.01255                              | 0.0007  | 0.10597   | 250.4                              | 5    | 251                                 | 10   | 301                                  | 59   | 250           | 5    | 0.24   |
| Zircon-005                  | 372                  | 130.2                 | 0.35 | 0.0527                               | 0.0028 | 0.286                               | 0.015  | 0.03963                             | 0.00082 | 0.01313                              | 0.00077 | 0.55596   | 250.5                              | 5.1  | 255                                 | 12   | 361                                  | 65   | 251           | 5    | 1.76   |
| Zircon-006                  | 232                  | 44                    | 0.19 | 0.0658                               | 0.0027 | 1.405                               | 0.064  | 0.1493                              | 0.0029  | 0.0478                               | 0.0027  | 0.71161   | 897                                | 17   | 888                                 | 27   | 800                                  | 50   | 897           | 17   | -1.01  |
| Zircon-007                  | 114.2                | 31.4                  | 0.27 | 0.054                                | 0.0047 | 0.34                                | 0.027  | 0.0468                              | 0.0013  | 0.0154                               | 0.0012  | -0.10092  | 294.9                              | 7.9  | 298                                 | 22   | 501                                  | 92   | 295           | 8    | 1.04   |
| Zircon-008                  | 114.9                | 50                    | 0.44 | 0.0946                               | 0.0039 | 3.57                                | 0.15   | 0.2737                              | 0.0048  | 0.0756                               | 0.0041  | 0.080348  | 1559                               | 24   | 1540                                | 33   | 1520                                 | 48   | 1520          | 48   | -1.23  |
| Zircon-009                  | 90.6                 | 19.37                 | 0.21 | 0.058                                | 0.0037 | 0.669                               | 0.042  | 0.0838                              | 0.0019  | 0.0262                               | 0.0022  | 0.18398   | 519                                | 11   | 521                                 | 27   | 557                                  | 78   | 519           | 11   | 0.38   |
| Zircon-010                  | 212                  | 64.6                  | 0.30 | 0.0735                               | 0.0032 | 1.391                               | 0.073  | 0.1455                              | 0.0029  | 0.0443                               | 0.0024  | 0.10275   | 876                                | 16   | 883                                 | 29   | 1026                                 | 52   | 876           | 16   | 0.79   |
| Zircon-011                  | 124                  | 72.4                  | 0.58 | 0.0604                               | 0.0059 | 0.316                               | 0.036  | 0.0414                              | 0.0012  | 0.0139                               | 0.0011  | -0.098993 | 261.3                              | 7.1  | 277                                 | 26   | 660                                  | 110  | 261           | 7    | 5.67   |
| Zircon-012                  | 258                  | 65.7                  | 0.25 | 0.0497                               | 0.0028 | 0.301                               | 0.016  | 0.04301                             | 0.00086 | 0.01392                              | 0.00092 | 0.0085716 | 271.4                              | 5.3  | 266                                 | 12   | 256                                  | 58   | 271           | 5    | -2.03  |
| Zircon-013                  | 89.4                 | 65.4                  | 0.73 | 0.0712                               | 0.0039 | 1.67                                | 0.11   | 0.1703                              | 0.0034  | 0.0504                               | 0.003   | 0.35039   | 1013                               | 19   | 988                                 | 42   | 955                                  | 75   | 1013          | 19   | -2.53  |
| Zircon-014                  | 327                  | 152.2                 | 0.47 | 0.0586                               | 0.0054 | 0.309                               | 0.038  | 0.03998                             | 0.00084 | 0.0146                               | 0.0014  | 0.28375   | 252.7                              | 5.2  | 272                                 | 27   | 540                                  | 160  | 253           | 5    | 7.10   |
| Zircon-015                  | 213.1                | 79.1                  | 0.37 | 0.0714                               | 0.003  | 1.68                                | 0.065  | 0.169                               | 0.0026  | 0.0502                               | 0.0027  | -0.019654 | 1006                               | 14   | 999                                 | 24   | 963                                  | 51   | 1006          | 14   | -0.70  |
| Zircon-016                  | 661                  | 438                   | 0.66 | 0.0502                               | 0.0022 | 0.314                               | 0.013  | 0.0442                              | 0.00069 | 0.01355                              | 0.00072 | -0.1413   | 278.8                              | 4.3  | 277                                 | 10   | 224                                  | 59   | 279           | 4    | -0.65  |
| Zircon-017                  | 520                  | 262                   | 0.50 | 0.0525                               | 0.0032 | 0.306                               | 0.026  | 0.0435                              | 0.0011  | 0.0145                               | 0.0013  | 0.66608   | 274.3                              | 6.7  | 270                                 | 19   | 308                                  | 82   | 274           | 7    | -1.59  |
| Zircon-018                  | 272                  | 274                   | 1.01 | 0.0551                               | 0.0032 | 0.315                               | 0.019  | 0.0428                              | 0.00087 | 0.01379                              | 0.00079 | 0.069163  | 270.2                              | 5.3  | 277                                 | 14   | 452                                  | 56   | 270           | 5    | 2.45   |
| Zircon-019                  | 144.4                | 77.5                  | 0.54 | 0.0734                               | 0.0032 | 1.96                                | 0.081  | 0.1877                              | 0.003   | 0.0525                               | 0.0029  | 0.12196   | 1109                               | 16   | 1099                                | 30   | 1019                                 | 45   | 1019          | 45   | -0.91  |
| Zircon-020                  | 87.2                 | 18.6                  | 0.21 | 0.0558                               | 0.0054 | 0.366                               | 0.035  | 0.0496                              | 0.0016  | 0.0179                               | 0.0019  | -0.042687 | 311.7                              | 9.8  | 314                                 | 25   | 480                                  | 100  | 312           | 10   | 0.73   |
| Zircon-021                  | 180.9                | 61.2                  | 0.34 | 0.0794                               | 0.0032 | 2.226                               | 0.087  | 0.204                               | 0.0032  | 0.06                                 | 0.0033  | 0.018516  | 1197                               | 17   | 1191                                | 26   | 1180                                 | 48   | 1180          | 48   | -0.50  |
| Zircon-022                  | 54.7                 | 69.5                  | 1.27 | 0.0809                               | 0.0042 | 2.42                                | 0.12   | 0.218                               | 0.0048  | 0.0584                               | 0.0031  | 0.11676   | 1271                               | 25   | 1242                                | 38   | 1206                                 | 59   | 1206          | 59   | -2.33  |
| Zircon-023                  | 187.8                | 125.2                 | 0.67 | 0.0508                               | 0.0038 | 0.28                                | 0.021  | 0.0402                              | 0.001   | 0.01286                              | 0.0008  | 0.054881  | 254                                | 6.2  | 249                                 | 16   | 365                                  | 72   | 254           | 6    | -2.01  |
| Zircon-024                  | 202.9                | 137.6                 | 0.68 | 0.0521                               | 0.0033 | 0.291                               | 0.018  | 0.04074                             | 0.0008  | 0.01205                              | 0.00071 | -0.08189  | 257.4                              | 5    | 259                                 | 14   | 360                                  | 63   | 257           | 5    | 0.62   |
| Zircon-025                  | 147.6                | 61.6                  | 0.42 | 0.076                                | 0.0033 | 1.731                               | 0.071  | 0.1705                              | 0.0029  | 0.0522                               | 0.0029  | -0.11026  | 1015                               | 16   | 1019                                | 26   | 1090                                 | 51   | 1090          | 51   | 0.39   |
| Zircon-026                  | 141.3                | 59.5                  | 0.42 | 0.053                                | 0.0042 | 0.308                               | 0.025  | 0.0417                              | 0.001   | 0.01326                              | 0.00091 | 0.063127  | 263.3                              | 6.3  | 270                                 | 20   | 469                                  | 75   | 263           | 6    | 2.48   |
| Zircon-027                  | 167.8                | 114.8                 | 0.68 | 0.055                                | 0.01   | 0.314                               | 0.079  | 0.0425                              | 0.0011  | 0.0133                               | 0.0014  | -0.32011  | 268.2                              | 7.1  | 276                                 | 36   | 470                                  | 200  | 268           | 7    | 2.83   |
| Zircon-028                  | 89.6                 | 21.3                  | 0.24 | 0.0745                               | 0.0038 | 1.688                               | 0.095  | 0.1676                              | 0.0039  | 0.05                                 | 0.0032  | 0.42428   | 998                                | 22   | 997                                 | 36   | 1048                                 | 50   | 1048          | 50   | -0.10  |
| Zircon-029                  | 319                  | 119                   | 0.37 | 0.0536                               | 0.0028 | 0.346                               | 0.017  | 0.04685                             | 0.00093 | 0.01452                              | 0.00085 | -0.051485 | 295.1                              | 5.7  | 301                                 | 13   | 367                                  | 64   | 295           | 6    | 1.96   |
| Zircon-030                  | 87.7                 | 44.7                  | 0.51 | 0.0511                               | 0.0057 | 0.261                               | 0.027  | 0.0378                              | 0.0013  | 0.01153                              | 0.00096 | -0.14464  | 238.8                              | 8.1  | 233                                 | 21   | 461                                  | 85   | 239           | 8    | -2.49  |
| Zircon-031                  | 586                  | 551                   | 0.94 | 0.0518                               | 0.0026 | 0.287                               | 0.014  | 0.04015                             | 0.00066 | 0.01259                              | 0.00066 | 0.17124   | 253.8                              | 4.1  | 256                                 | 11   | 279                                  | 59   | 254           | 4    | 0.86   |
| Zircon-032                  | 260.8                | 242                   | 0.93 | 0.0548                               | 0.0032 | 0.289                               | 0.017  | 0.0399                              | 0.00076 | 0.01217                              | 0.00066 | 0.068117  | 252.2                              | 4.7  | 257                                 | 14   | 426                                  | 74   | 252           | 5    | 1.87   |
| Zircon-033                  | 66.7                 | 25.11                 | 0.38 | 0.0544                               | 0.0051 | 0.35                                | 0.033  | 0.0466                              | 0.0012  | 0.0136                               | 0.0013  | 0.10442   | 293.3                              | 7.4  | 301                                 | 25   | 494                                  | 84   | 293           | 7    | 2.56   |
| Zircon-034                  | 295                  | 230                   | 0.78 | 0.0518                               | 0.0032 | 0.292                               | 0.019  | 0.04035                             | 0.00073 | 0.01253                              | 0.0007  | -0.30374  | 255                                | 4.5  | 259                                 | 15   | 340                                  | 64   | 255           | 5    | 1.54   |
| Zircon-035                  | 141.5                | 75.2                  | 0.53 | 0.0518                               | 0.0033 | 0.336                               | 0.021  | 0.0471                              | 0.0011  | 0.01447                              | 0.0009  | 0.030115  | 296.7                              | 6.6  | 293                                 | 16   | 376                                  | 65   | 297           | 7    | -1.26  |
| Zircon-036                  | 233.3                | 122.7                 | 0.53 | 0.0525                               | 0.0039 | 0.297                               | 0.02   | 0.04134                             | 0.00094 | 0.01295                              | 0.00074 | -0.46801  | 261.1                              | 5.8  | 263                                 | 15   | 370                                  | 84   | 261           | 6    | 0.72   |
| Zircon-037                  | 186.7                | 130.3                 | 0.70 | 0.0499                               | 0.0031 | 0.291                               | 0.019  | 0.04208                             | 0.00097 | 0.01327                              | 0.00082 | 0.3584    | 265.7                              | 6    | 258                                 | 15   | 317                                  | 70   | 266           | 6    | -2.98  |
| Zircon-038                  | 272.3                | 153.6                 | 0.56 | 0.0537                               | 0.0026 | 0.58                                | 0.026  | 0.0751                              | 0.0014  | 0.0221                               | 0.0013  | 0.30529   | 466.7                              | 8.1  | 463                                 | 18   | 354                                  | 70   | 467           | 8    | -0.80  |
| Zircon-039                  | 355                  | 92.3                  | 0.26 | 0.0734                               | 0.003  | 1.688                               | 0.094  | 0.1675                              | 0.0032  | 0.0501                               | 0.0028  | 0.75109   | 998                                | 17   | 999                                 | 34   | 1019                                 | 55   | 1019          | 55   | 0.10   |
| Zircon-040                  | 641                  | 31.2                  | 0.05 | 0.0832                               | 0.0031 | 2.61                                | 0.1    | 0.2239                              | 0.004   | 0.0669                               | 0.004   | 0.71262   | 1302                               | 21   | 1301                                | 29   | 1271                                 | 43   | 1271          | 43   | -0.08  |
| Zircon-041                  | 248.5                | 83.7                  | 0.34 | 0.0532                               | 0.0029 | 0.357                               | 0.018  | 0.049                               | 0.00093 | 0.0157                               | 0.001   | 0.016359  | 308.4                              | 5.7  | 309                                 | 13   | 369                                  | 69   | 308           | 6    | 0.19   |
| Zircon-042                  | 119.4                | 33.4                  | 0.28 | 0.0539                               | 0.0043 | 0.357                               | 0.027  | 0.0492                              | 0.0012  | 0.0155                               | 0.0013  | -0.074555 | 309.4                              | 7.4  | 312                                 | 21   | 432                                  | 76   | 309           | 7    | 0.83   |
| Zircon-043                  | 186                  | 57.6                  | 0.31 | 0.0536                               | 0.0034 | 0.34                                | 0.02   | 0.0464                              | 0.0011  | 0.01519                              | 0.00099 | -0.14141  | 292.3                              | 6.5  | 296                                 | 15   | 370                                  | 59   | 292           | 7    | 1.25   |
| Zircon-044                  | 68.2                 | 23.74                 | 0.35 | 0.0772                               | 0.0038 | 2.17                                | 0.11   | 0.2014                              | 0.0038  | 0.0602                               | 0.0039  | 0.10599   | 1190                               | 21   | 1167                                | 35   | 1124                                 | 52   | 1124          | 52   | -1.97  |
| Zircon-045                  | 132.3                | 46.3                  | 0.35 | 0.0506                               | 0.0043 | 0.296                               | 0.024  | 0.04292                             | 0.00095 | 0.0131                               | 0.0011  | -0.11996  | 270.9                              | 5.9  | 261                                 | 19   | 399                                  | 78   | 271           | 6    | -3.79  |
| Zircon-046                  | 340                  | 180                   | 0.53 | 0.0793                               | 0.003  | 2.279                               | 0.085  | 0.205                               | 0.0033  | 0.058                                | 0.003   | 0.11942   | 1202                               | 18   | 1204                                | 27   | 1176                                 | 41   | 1176          | 41   | 0.17   |
| Zircon-047                  | 226                  | 130                   | 0.58 | 0.0523                               | 0.0033 | 0.308                               | 0.02   | 0.04268                             | 0.00099 | 0.01353                              | 0.00081 | 0.054472  | 269.4                              | 6.1  | 272                                 | 16   | 387                                  | 83   | 269           | 6    | 0.96   |
| Zircon-048                  | 85.2                 | 22.52                 | 0.26 | 0.0523                               | 0.0047 | 0.331                               | 0.028  | 0.0467                              | 0.0014  | 0.0146                               | 0.0015  | 0.048965  | 294                                | 8.3  | 287                                 | 22   | 356                                  | 64   | 294           | 8    | -2.44  |
| Zircon-049                  | 10.28                | 2                     | 0.19 | 0.084                                | 0.011  | 1.75                                | 0.23   | 0.1629                              | 0.0077  | 0.0725                               | 0.0094  | -0.054734 | 972                                | 42   | 984                                 | 83   | 1210                                 | 140  | 1210          | 140  | 1.22   |
| Zircon-050                  | 130                  | 18.5                  | 0.14 | 0.086                                | 0.0035 | 3                                   | 0.15   | 0.2485                              | 0.0061  | 0.0718                               | 0.0045  | 0.62828   | 1430                               |      |                                     |      |                                      |      |               |      |        |

|            |       |       |      |        |        |       |       |         |         |         |         |           |       |     |       |     |      |     |      |    |       |
|------------|-------|-------|------|--------|--------|-------|-------|---------|---------|---------|---------|-----------|-------|-----|-------|-----|------|-----|------|----|-------|
| Zircon-054 | 319   | 104.3 | 0.33 | 0.0566 | 0.0025 | 0.689 | 0.028 | 0.0868  | 0.0015  | 0.0269  | 0.0016  | 0.20463   | 536.5 | 9.1 | 531   | 17  | 476  | 54  | 537  | 9  | -1.04 |
| Zircon-055 | 395   | 253   | 0.64 | 0.0514 | 0.0026 | 0.288 | 0.015 | 0.04097 | 0.00083 | 0.01313 | 0.00075 | 0.13854   | 258.8 | 5.1 | 256   | 12  | 273  | 53  | 259  | 5  | -1.09 |
| Zircon-056 | 323   | 77    | 0.24 | 0.0514 | 0.0028 | 0.324 | 0.017 | 0.0461  | 0.00079 | 0.01434 | 0.00094 | -0.077985 | 290.6 | 4.9 | 284   | 13  | 316  | 62  | 291  | 5  | -2.32 |
| Zircon-057 | 327   | 200   | 0.61 | 0.0537 | 0.0029 | 0.307 | 0.02  | 0.0424  | 0.0011  | 0.01334 | 0.00085 | 0.66836   | 267.8 | 6.6 | 271   | 15  | 369  | 70  | 268  | 7  | 1.18  |
| Zircon-058 | 263   | 189.7 | 0.72 | 0.052  | 0.0033 | 0.289 | 0.017 | 0.04066 | 0.00082 | 0.01249 | 0.00069 | -0.12474  | 256.9 | 5.1 | 257   | 13  | 329  | 68  | 257  | 5  | 0.04  |
| Zircon-059 | 312   | 154.7 | 0.50 | 0.0502 | 0.0028 | 0.287 | 0.017 | 0.04154 | 0.00078 | 0.01284 | 0.00073 | 0.16669   | 262.4 | 4.8 | 255   | 14  | 257  | 56  | 262  | 5  | -2.90 |
| Zircon-060 | 84.4  | 24.47 | 0.29 | 0.0857 | 0.0039 | 2.78  | 0.14  | 0.236   | 0.0047  | 0.0725  | 0.0045  | 0.3055    | 1365  | 25  | 1346  | 37  | 1321 | 62  | 1321 | 62 | -1.41 |
| Zircon-061 | 123.4 | 79.4  | 0.64 | 0.089  | 0.0036 | 2.91  | 0.12  | 0.2368  | 0.0042  | 0.069   | 0.0036  | -0.10761  | 1370  | 22  | 1382  | 31  | 1401 | 46  | 1401 | 46 | 0.87  |
| Zircon-062 | 475   | 258   | 0.54 | 0.0515 | 0.0025 | 0.245 | 0.011 | 0.03501 | 0.00057 | 0.01109 | 0.00064 | -0.27408  | 221.8 | 3.6 | 222.1 | 8.9 | 291  | 55  | 222  | 4  | 0.14  |
| Zircon-063 | 517   | 14.1  | 0.03 | 0.0523 | 0.0026 | 0.325 | 0.023 | 0.0455  | 0.0011  | 0.0123  | 0.0017  | 0.66898   | 286.5 | 7.1 | 284   | 17  | 297  | 65  | 287  | 7  | -0.88 |
| Zircon-064 | 83.1  | 49    | 0.59 | 0.0766 | 0.0035 | 1.982 | 0.092 | 0.1882  | 0.0036  | 0.0553  | 0.0031  | 0.33008   | 1111  | 20  | 1106  | 31  | 1114 | 49  | 1114 | 49 | -0.45 |
| Zircon-065 | 92.8  | 50.4  | 0.54 | 0.0715 | 0.0034 | 1.551 | 0.072 | 0.1563  | 0.0031  | 0.0465  | 0.0027  | 0.031847  | 936   | 17  | 948   | 28  | 974  | 47  | 936  | 17 | 1.27  |
| Zircon-066 | 146   | 40.6  | 0.28 | 0.0532 | 0.0045 | 0.344 | 0.03  | 0.046   | 0.0012  | 0.0146  | 0.0012  | -0.040951 | 289.7 | 7.2 | 297   | 22  | 401  | 94  | 290  | 7  | 2.46  |
| Zircon-067 | 223.1 | 157.6 | 0.71 | 0.0496 | 0.0034 | 0.28  | 0.019 | 0.04015 | 0.00076 | 0.01247 | 0.00072 | -0.17269  | 253.7 | 4.7 | 249   | 15  | 289  | 75  | 254  | 5  | -1.89 |
| Zircon-068 | 292.3 | 140.7 | 0.48 | 0.0531 | 0.0034 | 0.291 | 0.02  | 0.04008 | 0.00082 | 0.01259 | 0.00075 | -0.039066 | 253.3 | 5.1 | 258   | 15  | 395  | 76  | 253  | 5  | 1.82  |
| Zircon-069 | 403   | 115.8 | 0.29 | 0.0652 | 0.0027 | 0.896 | 0.04  | 0.1053  | 0.0018  | 0.03    | 0.0017  | 0.53301   | 646   | 11  | 648   | 21  | 775  | 43  | 646  | 11 | 0.31  |
| Zircon-070 | 251   | 121.8 | 0.49 | 0.0527 | 0.003  | 0.303 | 0.018 | 0.04272 | 0.0008  | 0.0132  | 0.00078 | 0.045511  | 269.7 | 4.9 | 268   | 14  | 372  | 77  | 270  | 5  | -0.63 |
| Zircon-071 | 278   | 64    | 0.23 | 0.0526 | 0.0029 | 0.347 | 0.018 | 0.04785 | 0.00088 | 0.01466 | 0.00095 | 0.038222  | 301.3 | 5.4 | 302   | 13  | 333  | 67  | 301  | 5  | 0.23  |
| Zircon-072 | 114.4 | 62.3  | 0.54 | 0.0684 | 0.0059 | 0.368 | 0.035 | 0.0406  | 0.001   | 0.0154  | 0.0011  | -0.10005  | 256.4 | 6.4 | 315   | 25  | 830  | 120 | 256  | 6  | 18.60 |
| Zircon-073 | 158.4 | 96.4  | 0.61 | 0.1456 | 0.0055 | 8.17  | 0.32  | 0.4148  | 0.0065  | 0.117   | 0.006   | 0.21964   | 2237  | 29  | 2248  | 37  | 2293 | 38  | 2293 | 38 | 0.49  |
| Zircon-074 | 133.6 | 36.5  | 0.27 | 0.0523 | 0.0041 | 0.318 | 0.025 | 0.04419 | 0.00097 | 0.0145  | 0.0012  | 0.062269  | 278.7 | 6   | 282   | 20  | 368  | 73  | 279  | 6  | 1.17  |
| Zircon-075 | 275.5 | 73.9  | 0.27 | 0.0722 | 0.0029 | 1.581 | 0.071 | 0.1616  | 0.0025  | 0.047   | 0.0026  | -0.15246  | 966   | 14  | 961   | 27  | 1004 | 54  | 966  | 14 | -0.52 |
| Zircon-076 | 126.7 | 66.1  | 0.52 | 0.0719 | 0.0034 | 1.648 | 0.074 | 0.1659  | 0.0028  | 0.0503  | 0.0027  | -0.13924  | 990   | 16  | 986   | 28  | 975  | 51  | 990  | 16 | -0.41 |
| Zircon-077 | 123.6 | 47.1  | 0.38 | 0.0703 | 0.0034 | 1.67  | 0.085 | 0.1691  | 0.0039  | 0.0484  | 0.0032  | 0.3488    | 1007  | 22  | 993   | 33  | 950  | 64  | 1007 | 22 | -1.41 |
| Zircon-078 | 291.4 | 63.1  | 0.22 | 0.0755 | 0.0029 | 1.929 | 0.074 | 0.1851  | 0.0036  | 0.0555  | 0.0031  | 0.14324   | 1095  | 19  | 1089  | 26  | 1086 | 41  | 1086 | 41 | -0.55 |
| Zircon-079 | 281   | 59.5  | 0.21 | 0.0553 | 0.0026 | 0.596 | 0.026 | 0.0771  | 0.0014  | 0.0241  | 0.0015  | -0.090422 | 478.7 | 8.1 | 474   | 17  | 428  | 55  | 479  | 8  | -0.99 |
| Zircon-080 | 123.5 | 27.1  | 0.22 | 0.0732 | 0.0035 | 1.73  | 0.11  | 0.1729  | 0.004   | 0.0526  | 0.0034  | 0.61272   | 1028  | 22  | 1020  | 39  | 1015 | 63  | 1015 | 63 | -0.78 |
| Zircon-081 | 110.2 | 56.9  | 0.52 | 0.0586 | 0.0038 | 0.635 | 0.072 | 0.0798  | 0.0051  | 0.0242  | 0.0016  | 0.32654   | 495   | 30  | 496   | 42  | 542  | 90  | 495  | 30 | 0.20  |
| Zircon-082 | 345   | 32.03 | 0.09 | 0.051  | 0.0027 | 0.33  | 0.016 | 0.04679 | 0.00093 | 0.0147  | 0.0011  | -0.013688 | 294.8 | 5.7 | 289   | 12  | 278  | 52  | 295  | 6  | -2.01 |
| Zircon-083 | 58.7  | 21.9  | 0.37 | 0.0693 | 0.0032 | 1.91  | 0.095 | 0.1894  | 0.0038  | 0.0533  | 0.0034  | 0.21799   | 1118  | 20  | 1087  | 34  | 933  | 56  | 933  | 56 | -2.85 |
| Zircon-084 | 80.5  | 62.5  | 0.78 | 0.0506 | 0.0056 | 0.253 | 0.028 | 0.0358  | 0.001   | 0.01124 | 0.00087 | 0.060525  | 226.8 | 6.3 | 225   | 22  | 414  | 81  | 227  | 6  | -0.80 |
| Zircon-085 | 274   | 119.9 | 0.44 | 0.0503 | 0.003  | 0.303 | 0.018 | 0.04363 | 0.00089 | 0.01367 | 0.00087 | 0.039605  | 275.3 | 5.5 | 268   | 14  | 278  | 67  | 275  | 6  | -2.72 |
| Zircon-086 | 254   | 145   | 0.57 | 0.0537 | 0.003  | 0.355 | 0.02  | 0.0483  | 0.001   | 0.0151  | 0.001   | 0.19131   | 304.1 | 6.2 | 308   | 14  | 351  | 74  | 304  | 6  | 1.27  |
| Zircon-087 | 116.9 | 74.7  | 0.64 | 0.069  | 0.0033 | 1.59  | 0.075 | 0.164   | 0.0029  | 0.0489  | 0.0027  | -0.047371 | 979   | 16  | 963   | 30  | 895  | 50  | 979  | 16 | -1.66 |
| Zircon-088 | 25.3  | 15.56 | 0.62 | 0.0758 | 0.0051 | 2.02  | 0.13  | 0.1934  | 0.0052  | 0.0565  | 0.004   | 0.22119   | 1139  | 28  | 1111  | 44  | 1066 | 79  | 1066 | 79 | -2.52 |
| Zircon-089 | 20.57 | 93.2  | 4.53 | 0.0814 | 0.0066 | 2.34  | 0.18  | 0.2099  | 0.0058  | 0.0596  | 0.0032  | -0.066241 | 1227  | 31  | 1206  | 56  | 1230 | 82  | 1230 | 82 | -1.74 |
| Zircon-090 | 37.2  | 16.72 | 0.45 | 0.0734 | 0.0047 | 1.7   | 0.11  | 0.1677  | 0.004   | 0.0541  | 0.0035  | 0.15411   | 999   | 22  | 998   | 42  | 1009 | 66  | 1009 | 66 | -0.10 |
| Zircon-091 | 273.1 | 248.4 | 0.91 | 0.0534 | 0.0028 | 0.302 | 0.016 | 0.04104 | 0.00081 | 0.01214 | 0.00066 | 0.074659  | 259.2 | 5   | 267   | 12  | 335  | 48  | 259  | 5  | 2.92  |
| Zircon-092 | 36.9  | 11.77 | 0.32 | 0.0692 | 0.0049 | 1.61  | 0.1   | 0.1687  | 0.0042  | 0.053   | 0.0045  | -0.36135  | 1004  | 23  | 965   | 37  | 894  | 72  | 1004 | 23 | -4.04 |
| Zircon-093 | 570   | 77.1  | 0.14 | 0.0571 | 0.0022 | 0.728 | 0.03  | 0.0898  | 0.0014  | 0.0271  | 0.0016  | 0.28413   | 554.4 | 8.1 | 554   | 17  | 492  | 57  | 554  | 8  | -0.07 |
| Zircon-094 | 47.6  | 111.8 | 2.35 | 0.0776 | 0.0045 | 2.09  | 0.13  | 0.1934  | 0.005   | 0.0563  | 0.0029  | 0.28609   | 1139  | 27  | 1138  | 42  | 1128 | 63  | 1128 | 63 | -0.09 |
| Zircon-095 | 37.7  | 4.63  | 0.12 | 0.0782 | 0.0047 | 2.26  | 0.11  | 0.2067  | 0.0056  | 0.0615  | 0.0069  | 0.019055  | 1210  | 30  | 1194  | 35  | 1138 | 67  | 1138 | 67 | -1.34 |
| Zircon-096 | 268.9 | 83.2  | 0.31 | 0.0524 | 0.0025 | 0.341 | 0.016 | 0.04721 | 0.00086 | 0.01431 | 0.00094 | 0.011908  | 297.3 | 5.3 | 298   | 12  | 322  | 69  | 297  | 5  | 0.23  |
| Zircon-097 | 107.5 | 44.9  | 0.42 | 0.0593 | 0.0042 | 0.456 | 0.035 | 0.06    | 0.0014  | 0.0241  | 0.0015  | -0.077444 | 375.7 | 8.3 | 380   | 23  | 586  | 98  | 376  | 8  | 1.13  |
| Zircon-098 | 313   | 78.2  | 0.25 | 0.0507 | 0.0028 | 0.311 | 0.016 | 0.04348 | 0.00099 | 0.01236 | 0.00082 | 0.19124   | 274.4 | 6.1 | 274   | 12  | 257  | 45  | 274  | 6  | -0.15 |
| Zircon-099 | 185   | 35.8  | 0.19 | 0.052  | 0.0037 | 0.35  | 0.032 | 0.0492  | 0.0012  | 0.0156  | 0.0014  | 0.32735   | 309.5 | 7.6 | 303   | 24  | 340  | 110 | 310  | 8  | -2.15 |
| Zircon-100 | 335   | 212.2 | 0.63 | 0.0494 | 0.0028 | 0.249 | 0.013 | 0.03611 | 0.0007  | 0.01097 | 0.00062 | 0.10278   | 228.6 | 4.3 | 225   | 11  | 261  | 56  | 229  | 4  | -1.60 |

#### Esperanza Formation GTO14-1

|                   |       |       |      |        |        |       |       |        |         |         |         |           |       |     |      |    |      |    |      |    |       |
|-------------------|-------|-------|------|--------|--------|-------|-------|--------|---------|---------|---------|-----------|-------|-----|------|----|------|----|------|----|-------|
| Zircon-001_Gto14- | 573   | 126.8 | 0.22 | 0.059  | 0.0026 | 0.618 | 0.035 | 0.0758 | 0.0027  | 0.0256  | 0.00130 | -0.051838 | 471   | 17  | 488  | 24 | 554  | 62 | 471  | 17 | 3.48  |
| Zircon-002        | 513   | 59.1  | 0.12 | 0.0545 | 0.0041 | 0.58  | 0.04  | 0.0777 | 0.0021  | 0.02135 | 0.00095 | 0.34911   | 482   | 12  | 463  | 24 | 386  | 70 | 482  | 12 | -4.10 |
| Zircon-003        | 106   | 55.3  | 0.52 | 0.0799 | 0.0034 | 2.307 | 0.095 | 0.2104 | 0.0033  | 0.0649  | 0.00220 | 0.10953   | 1231  | 17  | 1212 | 30 | 1189 | 51 | 1189 | 51 | -1.57 |
| Zircon-004        | 363   | 126.5 | 0.35 | 0.0506 | 0.0026 | 0.28  | 0.013 | 0.0403 | 0.00059 | 0.01246 | 0.00054 | -0.20212  | 254.7 | 3.6 | 250  | 11 | 259  | 61 | 255  | 4  | -1.88 |
| Zircon-005        | 130.5 | 86.6  | 0.66 | 0.128  | 0.0047 | 6.62  | 0.24  | 0.3757 | 0.0047  | 0.106   | 0.00340 | 0.27154   | 2056  | 22  | 2061 | 29 | 2071 | 35 | 2071 | 35 | 0.24  |
| Zircon-006        | 253.2 | 96.8  | 0.38 | 0.0671 | 0.0029 | 1.059 | 0.046 | 0.1155 | 0.0017  | 0.0376  | 0.00180 | -0.043201 | 704.7 | 9.8 | 732  | 19 | 821  | 57 | 705  | 10 | 3.73  |
| Zircon-007        | 229   | 155.2 | 0.68 | 0.0585 | 0.0028 | 0.617 | 0.028 | 0.0768 | 0.0014  | 0.02386 | 0.00092 | 0.077138  | 477.2 | 8.4 | 487  | 18 | 555  | 46 | 477  | 8  | 2.01  |
| Zircon-008        | 392   | 51    | 0.13 | 0.0691 | 0.0026 | 1.38  | 0.056 | 0.1458 | 0.0028  | 0.0439  | 0.00230 | 0.12484   | 877   | 16  | 880  | 25 | 906  | 49 | 877  | 16 | 0.34  |
| Zircon-009        | 216.2 | 148.7 | 0.69 | 0.0544 | 0.0034 | 0.307 | 0.023 | 0.0413 | 0.0011  | 0.0129  | 0.00150 | 0.22601   | 261.1 | 6.8 | 271  | 17 | 390  | 72 | 261  | 7  | 3.65  |
| Zircon-010        | 70    | 52    | 0.74 | 0.0936 | 0.0042 | 3.42  | 0.14  | 0.2644 | 0.0065  | 0.0791  | 0.00280 | 0.016124  | 1511  | 33  | 1506 | 32 | 1509 | 72 | 1509 | 72 | -0.33 |
| Zircon-011        | 490   | 102   | 0.21 | 0.0548 | 0.0023 | 0.538 | 0.024 | 0.0713 | 0.0018  | 0.0243  | 0.00110 | 0.52709   | 444   | 11  | 436  | 16 | 401  | 47 | 444  | 11 | -1.83 |

|            |       |       |      |        |        |       |       |         |         |         |         |            |       |     |      |    |      |     |      |     |       |
|------------|-------|-------|------|--------|--------|-------|-------|---------|---------|---------|---------|------------|-------|-----|------|----|------|-----|------|-----|-------|
| Zircon-017 | 103.3 | 65.6  | 0.64 | 0.0588 | 0.0033 | 0.58  | 0.032 | 0.0719  | 0.0012  | 0.022   | 0.00110 | -0.20032   | 447.6 | 7   | 463  | 20 | 558  | 59  | 448  | 7   | 3.33  |
| Zircon-018 | 108   | 42.3  | 0.39 | 0.0725 | 0.0032 | 1.693 | 0.074 | 0.1698  | 0.0025  | 0.0508  | 0.00220 | 0.22994    | 1011  | 14  | 1004 | 28 | 997  | 43  | 997  | 43  | -0.70 |
| Zircon-019 | 171.8 | 103.7 | 0.60 | 0.0535 | 0.0054 | 0.293 | 0.034 | 0.03969 | 0.00096 | 0.0125  | 0.00110 | 0.17675    | 250.9 | 5.9 | 260  | 27 | 350  | 160 | 251  | 6   | 3.50  |
| Zircon-020 | 428   | 491   | 1.15 | 0.0563 | 0.0024 | 0.545 | 0.023 | 0.0704  | 0.0011  | 0.02241 | 0.00080 | 0.41958    | 438.5 | 6.6 | 441  | 15 | 460  | 51  | 439  | 7   | 0.57  |
| Zircon-021 | 416   | 471   | 1.13 | 0.0526 | 0.0031 | 0.226 | 0.014 | 0.03127 | 0.00048 | 0.00985 | 0.00035 | -0.11419   | 198.5 | 3   | 207  | 11 | 326  | 72  | 199  | 3   | 4.11  |
| Zircon-022 | 78.2  | 29.23 | 0.37 | 0.0695 | 0.0037 | 1.496 | 0.077 | 0.1568  | 0.0027  | 0.0466  | 0.00220 | 0.082542   | 939   | 15  | 925  | 31 | 906  | 62  | 939  | 15  | -1.51 |
| Zircon-023 | 82.4  | 54.5  | 0.66 | 0.0795 | 0.0037 | 2.038 | 0.089 | 0.1884  | 0.0035  | 0.0616  | 0.00240 | -0.0004431 | 1113  | 19  | 1126 | 31 | 1174 | 63  | 1174 | 63  | 1.15  |
| Zircon-024 | 140.2 | 111.4 | 0.79 | 0.051  | 0.004  | 0.287 | 0.021 | 0.04065 | 0.00096 | 0.01247 | 0.00056 | -0.015169  | 256.8 | 6   | 254  | 17 | 395  | 88  | 257  | 6   | -1.10 |
| Zircon-025 | 67.5  | 111   | 1.64 | 0.056  | 0.0041 | 0.558 | 0.043 | 0.0715  | 0.0016  | 0.02174 | 0.00084 | 0.10627    | 445.3 | 9.7 | 451  | 30 | 583  | 87  | 445  | 10  | 1.26  |
| Zircon-026 | 75.5  | 26.8  | 0.35 | 0.0746 | 0.0035 | 1.748 | 0.078 | 0.171   | 0.0028  | 0.0514  | 0.00280 | 0.11424    | 1017  | 16  | 1024 | 29 | 1025 | 53  | 1025 | 53  | 0.68  |
| Zircon-027 | 180.7 | 93.2  | 0.52 | 0.1035 | 0.0039 | 4.24  | 0.23  | 0.297   | 0.012   | 0.0923  | 0.00280 | 0.58898    | 1678  | 60  | 1680 | 53 | 1692 | 49  | 1692 | 49  | 0.12  |
| Zircon-028 | 211.2 | 99    | 0.47 | 0.0991 | 0.0037 | 3.89  | 0.17  | 0.286   | 0.0076  | 0.0813  | 0.00320 | 0.31874    | 1621  | 39  | 1611 | 39 | 1606 | 48  | 1606 | 48  | -0.62 |
| Zircon-029 | 243   | 103.6 | 0.43 | 0.073  | 0.0029 | 1.817 | 0.073 | 0.1821  | 0.0025  | 0.0536  | 0.00180 | 0.43522    | 1078  | 14  | 1051 | 27 | 1014 | 41  | 1014 | 41  | -2.57 |
| Zircon-030 | 545   | 210   | 0.39 | 0.056  | 0.0023 | 0.581 | 0.023 | 0.07562 | 0.00097 | 0.02384 | 0.00084 | 0.089104   | 469.9 | 5.8 | 464  | 15 | 448  | 38  | 470  | 6   | -1.27 |
| Zircon-031 | 976   | 182   | 0.19 | 0.0557 | 0.0022 | 0.577 | 0.021 | 0.07535 | 0.00084 | 0.02217 | 0.00078 | -0.27514   | 468.3 | 5   | 462  | 14 | 444  | 46  | 468  | 5   | -1.36 |
| Zircon-032 | 106.1 | 23.2  | 0.22 | 0.0793 | 0.0033 | 2.219 | 0.095 | 0.2036  | 0.003   | 0.0657  | 0.00310 | 0.34482    | 1194  | 16  | 1184 | 30 | 1177 | 51  | 1177 | 51  | -0.84 |
| Zircon-033 | 160   | 39.6  | 0.25 | 0.0808 | 0.0033 | 2.36  | 0.11  | 0.2151  | 0.0043  | 0.0645  | 0.00270 | 0.11127    | 1256  | 23  | 1230 | 31 | 1214 | 45  | 1214 | 45  | -2.11 |
| Zircon-034 | 181.9 | 72.4  | 0.40 | 0.0784 | 0.003  | 2.116 | 0.078 | 0.1971  | 0.0025  | 0.0589  | 0.00220 | 0.28493    | 1159  | 14  | 1153 | 26 | 1159 | 44  | 1159 | 44  | -0.52 |
| Zircon-035 | 248   | 16.4  | 0.07 | 0.0556 | 0.0027 | 0.572 | 0.027 | 0.0751  | 0.0011  | 0.0255  | 0.00150 | -0.13871   | 466.8 | 6.8 | 458  | 17 | 439  | 63  | 467  | 7   | -1.92 |
| Zircon-036 | 145.3 | 49.1  | 0.34 | 0.0628 | 0.0029 | 0.905 | 0.04  | 0.1054  | 0.0017  | 0.0347  | 0.00150 | 0.22098    | 646   | 10  | 653  | 23 | 695  | 60  | 646  | 10  | 1.07  |
| Zircon-037 | 203.7 | 114.1 | 0.56 | 0.061  | 0.0028 | 0.843 | 0.039 | 0.1007  | 0.0014  | 0.0307  | 0.00110 | 0.15699    | 618.5 | 8.4 | 619  | 21 | 638  | 57  | 619  | 8   | 0.08  |
| Zircon-038 | 224.3 | 188   | 0.84 | 0.0575 | 0.0029 | 0.611 | 0.03  | 0.0775  | 0.0012  | 0.024   | 0.00085 | 0.076379   | 481.4 | 7.2 | 483  | 19 | 516  | 59  | 481  | 7   | 0.33  |
| Zircon-039 | 285.6 | 86.8  | 0.30 | 0.0851 | 0.0032 | 2.6   | 0.092 | 0.2226  | 0.0026  | 0.0653  | 0.00220 | 0.093996   | 1296  | 14  | 1300 | 26 | 1314 | 40  | 1314 | 40  | 0.31  |
| Zircon-040 | 821   | 168   | 0.20 | 0.0776 | 0.0028 | 1.997 | 0.073 | 0.188   | 0.0021  | 0.0577  | 0.00170 | 0.68799    | 1110  | 12  | 1113 | 24 | 1137 | 43  | 1137 | 43  | 0.27  |
| Zircon-041 | 218   | 26.94 | 0.12 | 0.0556 | 0.003  | 0.554 | 0.027 | 0.0728  | 0.0013  | 0.0231  | 0.00140 | -0.019201  | 452.8 | 7.7 | 446  | 18 | 426  | 64  | 453  | 8   | -1.52 |
| Zircon-042 | 49    | 15.03 | 0.31 | 0.0806 | 0.0042 | 2.31  | 0.12  | 0.2089  | 0.0073  | 0.0633  | 0.00390 | 0.42389    | 1221  | 39  | 1207 | 39 | 1199 | 66  | 1199 | 66  | -1.16 |
| Zircon-043 | 62.1  | 49.8  | 0.80 | 0.0611 | 0.0056 | 0.662 | 0.054 | 0.0772  | 0.0017  | 0.0263  | 0.00120 | 0.083945   | 479.5 | 9.9 | 510  | 33 | 718  | 91  | 480  | 10  | 5.98  |
| Zircon-044 | 82.8  | 25.52 | 0.31 | 0.0743 | 0.0038 | 1.757 | 0.089 | 0.1721  | 0.0031  | 0.0587  | 0.00340 | 0.2744     | 1023  | 17  | 1025 | 33 | 1039 | 69  | 1039 | 69  | 0.20  |
| Zircon-045 | 538   | 375   | 0.70 | 0.057  | 0.0024 | 0.557 | 0.023 | 0.07149 | 0.00097 | 0.02276 | 0.00086 | 0.21952    | 445.1 | 5.8 | 449  | 15 | 487  | 45  | 445  | 6   | 0.87  |
| Zircon-046 | 203.3 | 40.7  | 0.20 | 0.074  | 0.0096 | 1.74  | 0.33  | 0.1722  | 0.0057  | 0.057   | 0.03200 | 0.082974   | 1024  | 30  | 1022 | 81 | 1040 | 150 | 1040 | 150 | -0.20 |
| Zircon-047 | 365   | 312   | 0.85 | 0.0585 | 0.0028 | 0.575 | 0.025 | 0.0729  | 0.001   | 0.02415 | 0.00088 | -0.60204   | 453.6 | 6.2 | 461  | 16 | 571  | 61  | 454  | 6   | 1.61  |
| Zircon-048 | 319   | 56.9  | 0.18 | 0.0526 | 0.0032 | 0.29  | 0.018 | 0.04003 | 0.00081 | 0.01484 | 0.00091 | 0.25713    | 253   | 5   | 258  | 14 | 338  | 71  | 253  | 5   | 1.94  |
| Zircon-049 | 48.9  | 21.9  | 0.45 | 0.0783 | 0.004  | 2.16  | 0.11  | 0.2012  | 0.0036  | 0.064   | 0.00320 | -0.15535   | 1182  | 20  | 1165 | 35 | 1132 | 65  | 1132 | 65  | -1.46 |
| Zircon-050 | 194   | 158.3 | 0.82 | 0.0515 | 0.0035 | 0.286 | 0.019 | 0.04037 | 0.0008  | 0.01268 | 0.00050 | 0.077931   | 255.1 | 5   | 254  | 15 | 323  | 58  | 255  | 5   | -0.43 |
| Zircon-051 | 445   | 58.2  | 0.13 | 0.0749 | 0.0029 | 1.892 | 0.08  | 0.1842  | 0.0033  | 0.0604  | 0.00220 | 0.50882    | 1090  | 18  | 1077 | 27 | 1066 | 42  | 1066 | 42  | -1.21 |
| Zircon-052 | 418   | 509   | 1.22 | 0.0564 | 0.0027 | 0.529 | 0.023 | 0.0683  | 0.001   | 0.02077 | 0.00066 | -0.038398  | 426.1 | 6.2 | 431  | 16 | 464  | 51  | 426  | 6   | 1.14  |
| Zircon-053 | 120.7 | 52.5  | 0.43 | 0.0811 | 0.0036 | 2.253 | 0.094 | 0.2022  | 0.003   | 0.0637  | 0.00250 | -0.12682   | 1187  | 16  | 1195 | 29 | 1220 | 58  | 1220 | 58  | 0.67  |
| Zircon-054 | 411   | 215.1 | 0.52 | 0.0707 | 0.0028 | 1.537 | 0.057 | 0.1574  | 0.002   | 0.0481  | 0.00150 | -0.099297  | 942   | 11  | 944  | 23 | 965  | 38  | 942  | 11  | 0.21  |
| Zircon-055 | 873   | 44.4  | 0.05 | 0.0723 | 0.0029 | 1.7   | 0.12  | 0.1722  | 0.0066  | 0.0561  | 0.00240 | 0.54179    | 1024  | 36  | 1009 | 39 | 994  | 60  | 994  | 60  | -1.49 |
| Zircon-056 | 130.2 | 59.3  | 0.46 | 0.078  | 0.0033 | 2.032 | 0.08  | 0.1895  | 0.0029  | 0.0592  | 0.00260 | 0.064403   | 1119  | 16  | 1125 | 27 | 1144 | 44  | 1144 | 44  | 0.53  |
| Zircon-057 | 261   | 26.87 | 0.10 | 0.0612 | 0.0025 | 0.953 | 0.037 | 0.1129  | 0.0014  | 0.0341  | 0.00190 | -0.12662   | 689.5 | 8.1 | 679  | 19 | 640  | 51  | 690  | 8   | -1.55 |
| Zircon-058 | 105.6 | 34.4  | 0.33 | 0.0531 | 0.0047 | 0.323 | 0.026 | 0.0446  | 0.0011  | 0.0131  | 0.00130 | -0.19862   | 281.4 | 6.9 | 281  | 20 | 527  | 83  | 281  | 7   | -0.14 |
| Zircon-059 | 291.9 | 101.2 | 0.35 | 0.0709 | 0.0028 | 1.359 | 0.052 | 0.14    | 0.0021  | 0.0493  | 0.00170 | 0.46788    | 844   | 12  | 870  | 23 | 949  | 37  | 844  | 12  | 2.99  |
| Zircon-060 | 118.7 | 95.7  | 0.81 | 0.0787 | 0.0035 | 2.078 | 0.094 | 0.1915  | 0.0026  | 0.0592  | 0.00210 | 0.38686    | 1130  | 14  | 1138 | 29 | 1161 | 53  | 1161 | 53  | 0.70  |
| Zircon-061 | 85.8  | 60.7  | 0.71 | 0.0725 | 0.0032 | 1.719 | 0.075 | 0.171   | 0.0026  | 0.0519  | 0.00200 | 0.25685    | 1017  | 14  | 1013 | 28 | 1001 | 47  | 1001 | 47  | -0.39 |
| Zircon-062 | 260.9 | 181   | 0.69 | 0.1255 | 0.0043 | 6.47  | 0.22  | 0.3723  | 0.0042  | 0.1058  | 0.00310 | 0.39344    | 2040  | 20  | 2041 | 30 | 2035 | 34  | 2035 | 34  | 0.05  |
| Zircon-063 | 209   | 76.4  | 0.37 | 0.0954 | 0.0035 | 3.59  | 0.13  | 0.2725  | 0.0047  | 0.0795  | 0.00280 | 0.51583    | 1553  | 24  | 1547 | 30 | 1534 | 30  | 1534 | 30  | -0.39 |
| Zircon-064 | 183.3 | 55.3  | 0.30 | 0.051  | 0.0033 | 0.292 | 0.019 | 0.04142 | 0.00088 | 0.01238 | 0.00085 | 0.15252    | 261.6 | 5.4 | 259  | 15 | 294  | 60  | 262  | 5   | -1.00 |
| Zircon-065 | 164.5 | 37.3  | 0.23 | 0.0584 | 0.0033 | 0.69  | 0.039 | 0.0844  | 0.0014  | 0.0261  | 0.00130 | 0.25617    | 522.6 | 8.3 | 530  | 23 | 568  | 77  | 523  | 8   | 1.40  |
| Zircon-066 | 126.4 | 61.7  | 0.49 | 0.0757 | 0.0034 | 1.929 | 0.089 | 0.1842  | 0.0043  | 0.0587  | 0.00260 | 0.16439    | 1090  | 24  | 1088 | 32 | 1074 | 47  | 1074 | 47  | -0.18 |
| Zircon-067 | 106.1 | 43    | 0.41 | 0.0585 | 0.0037 | 0.64  | 0.12  | 0.0806  | 0.0073  | 0.0267  | 0.00230 | 0.36623    | 499   | 42  | 502  | 54 | 523  | 81  | 499  | 42  | 0.60  |
| Zircon-068 | 916   | 499   | 0.54 | 0.0562 | 0.0021 | 0.572 | 0.022 | 0.07307 | 0.00086 | 0.0225  | 0.00081 | 0.26235    | 454.6 | 5.1 | 459  | 14 | 457  | 48  | 455  | 5   | 0.96  |
| Zircon-069 | 88    | 46    | 0.52 | 0.0597 | 0.0035 | 0.886 | 0.051 | 0.1067  | 0.002   | 0.0334  | 0.00160 | 0.19233    | 653   | 12  | 641  | 28 | 580  | 78  | 653  | 12  | -1.87 |
| Zircon-070 | 297.3 | 58.6  | 0.20 | 0.0591 | 0.0026 | 0.753 | 0.033 | 0.0909  | 0.0012  | 0.028   | 0.00140 | 0.093165   | 560.7 | 7.1 | 569  | 19 | 578  | 57  | 561  | 7   | 1.46  |
| Zircon-071 | 277.7 | 200.5 | 0.72 | 0.0549 | 0.0026 | 0.507 | 0.022 | 0.0661  | 0.0013  | 0.02041 | 0.00076 | -0.048248  | 412.3 | 8   | 416  | 15 | 428  | 69  | 412  | 8   | 0.89  |
| Zircon-072 | 142.5 | 102.3 | 0.72 | 0.0558 | 0.003  | 0.566 | 0.031 | 0.0728  | 0.0017  | 0.02218 | 0.00078 | 0.35212    | 453   | 10  | 454  | 20 | 436  | 55  | 453  | 10  | 0.22  |
| Zircon-073 | 167.9 | 114.1 | 0.68 | 0.0858 | 0.0032 | 2.73  | 0.1   | 0.2283  | 0.0034  | 0.0685  | 0.00230 | 0.45563    | 1326  | 18  | 1334 | 28 | 1331 | 35  | 1331 | 35  | 0.60  |
| Zircon-074 | 71.8  | 58.1  | 0.81 | 0.086  | 0.0043 | 2.71  | 0.14  | 0.2261  | 0.0036  | 0.0674  | 0.00240 | 0.406      | 1314  | 19  | 1325 | 37 | 1333 | 51  | 1333 | 51  | 0.83  |
| Zircon-075 | 191   | 66.8  | 0.35 | 0.0587 | 0.0027 |       |       |         |         |         |         |            |       |     |      |    |      |     |      |     |       |

|            |       |       |      |        |        |       |       |         |         |         |         |            |       |     |      |    |      |    |      |    |       |
|------------|-------|-------|------|--------|--------|-------|-------|---------|---------|---------|---------|------------|-------|-----|------|----|------|----|------|----|-------|
| Zircon-082 | 446   | 63.9  | 0.14 | 0.079  | 0.0029 | 2.208 | 0.081 | 0.2009  | 0.0028  | 0.0625  | 0.00220 | 0.45378    | 1180  | 15  | 1183 | 25 | 1173 | 38 | 1173 | 38 | 0.25  |
| Zircon-083 | 165.2 | 94.8  | 0.57 | 0.0775 | 0.003  | 2.139 | 0.086 | 0.1981  | 0.0028  | 0.0576  | 0.00200 | 0.4771     | 1165  | 15  | 1159 | 28 | 1132 | 36 | 1132 | 36 | -0.52 |
| Zircon-084 | 261   | 36.8  | 0.14 | 0.0786 | 0.003  | 2.195 | 0.083 | 0.2008  | 0.0025  | 0.0599  | 0.00270 | 0.34383    | 1180  | 13  | 1178 | 27 | 1159 | 45 | 1159 | 45 | -0.17 |
| Zircon-085 | 109.7 | 68.2  | 0.62 | 0.0587 | 0.0037 | 0.752 | 0.044 | 0.0927  | 0.0017  | 0.0288  | 0.00120 | -0.12174   | 571.4 | 9.7 | 566  | 26 | 554  | 75 | 571  | 10 | -0.95 |
| Zircon-086 | 456   | 281.2 | 0.62 | 0.0994 | 0.0035 | 3.96  | 0.13  | 0.2875  | 0.003   | 0.0823  | 0.00250 | 0.2087     | 1629  | 15  | 1627 | 29 | 1615 | 34 | 1615 | 34 | -0.12 |
| Zircon-087 | 52.7  | 33.73 | 0.64 | 0.1034 | 0.0041 | 4.24  | 0.17  | 0.296   | 0.0045  | 0.0906  | 0.00370 | 0.54832    | 1671  | 23  | 1684 | 35 | 1686 | 39 | 1686 | 39 | 0.77  |
| Zircon-088 | 97.7  | 47.8  | 0.49 | 0.0756 | 0.0033 | 1.908 | 0.085 | 0.1821  | 0.0037  | 0.0556  | 0.00290 | 0.39902    | 1078  | 20  | 1081 | 29 | 1083 | 44 | 1083 | 44 | 0.28  |
| Zircon-089 | 84.5  | 53.2  | 0.63 | 0.0546 | 0.0058 | 0.303 | 0.029 | 0.0404  | 0.0012  | 0.01299 | 0.00077 | -0.052727  | 255.4 | 7.4 | 265  | 23 | 495  | 94 | 255  | 7  | 3.62  |
| Zircon-090 | 221   | 51.3  | 0.23 | 0.0836 | 0.0031 | 2.62  | 0.11  | 0.226   | 0.0052  | 0.0621  | 0.00280 | 0.56888    | 1313  | 27  | 1304 | 31 | 1282 | 49 | 1282 | 49 | -0.69 |
| Zircon-091 | 23.6  | 5.15  | 0.22 | 0.0832 | 0.0063 | 2.56  | 0.27  | 0.224   | 0.013   | 0.068   | 0.01800 | 0.24471    | 1300  | 68  | 1275 | 71 | 1254 | 90 | 1254 | 90 | -1.96 |
| Zircon-092 | 142.1 | 30.6  | 0.22 | 0.052  | 0.004  | 0.316 | 0.023 | 0.0443  | 0.0011  | 0.0129  | 0.00110 | -0.0010408 | 279.5 | 6.7 | 277  | 18 | 386  | 68 | 280  | 7  | -0.90 |
| Zircon-093 | 427   | 251   | 0.59 | 0.0574 | 0.0032 | 0.322 | 0.017 | 0.04086 | 0.00076 | 0.01337 | 0.00046 | 0.24197    | 258.1 | 4.7 | 283  | 13 | 515  | 74 | 258  | 5  | 8.80  |
| Zircon-094 | 228.9 | 130.2 | 0.57 | 0.0573 | 0.0028 | 0.616 | 0.029 | 0.0791  | 0.0014  | 0.0237  | 0.00096 | 0.22161    | 490.4 | 8.1 | 486  | 18 | 492  | 68 | 490  | 8  | -0.91 |
| Zircon-095 | 315   | 60.4  | 0.19 | 0.0618 | 0.0026 | 0.912 | 0.042 | 0.1067  | 0.0022  | 0.0328  | 0.00150 | 0.19572    | 653   | 13  | 657  | 22 | 663  | 46 | 653  | 13 | 0.61  |
| Zircon-096 | 103.2 | 439   | 4.25 | 0.0933 | 0.0039 | 3.33  | 0.13  | 0.2595  | 0.004   | 0.0731  | 0.00210 | 0.10771    | 1487  | 20  | 1486 | 31 | 1493 | 41 | 1493 | 41 | -0.07 |
| Zircon-097 | 153.9 | 54.7  | 0.36 | 0.0735 | 0.0032 | 1.717 | 0.072 | 0.1698  | 0.0026  | 0.0495  | 0.00200 | 0.10889    | 1011  | 14  | 1013 | 27 | 1018 | 60 | 1018 | 60 | 0.20  |
| Zircon-098 | 174.8 | 62.9  | 0.36 | 0.0746 | 0.0035 | 1.729 | 0.073 | 0.1691  | 0.0024  | 0.05    | 0.00180 | 0.23061    | 1007  | 13  | 1017 | 27 | 1054 | 50 | 1054 | 50 | 0.98  |
| Zircon-099 | 117   | 4.6   | 0.04 | 0.0819 | 0.0037 | 2.4   | 0.13  | 0.2123  | 0.0069  | 0.176   | 0.01500 | 0.42552    | 1241  | 37  | 1238 | 39 | 1248 | 41 | 1248 | 41 | -0.24 |
| Zircon-100 | 374   | 109.8 | 0.29 | 0.0612 | 0.0026 | 0.888 | 0.036 | 0.1056  | 0.0013  | 0.0315  | 0.00120 | -0.01492   | 647.4 | 7.6 | 644  | 19 | 644  | 56 | 647  | 8  | -0.53 |

#### Cuestecita Formation SL67

|                  |       |       |        |        |        |        |        |         |         |         |         |            |       |     |       |     |      |     |      |    |       |
|------------------|-------|-------|--------|--------|--------|--------|--------|---------|---------|---------|---------|------------|-------|-----|-------|-----|------|-----|------|----|-------|
| Zircon-001_SL-67 | 326   | 233   | 0.7147 | 0.0511 | 0.0031 | 0.18   | 0.011  | 0.02563 | 0.00057 | 0.00874 | 0.00046 | 0.12854    | 163.1 | 3.6 | 168.2 | 9   | 308  | 93  | 163  | 4  | 3.03  |
| Zircon-002       | 260   | 213   | 0.8192 | 0.0516 | 0.0044 | 0.16   | 0.014  | 0.02203 | 0.00041 | 0.00743 | 0.00045 | 0.14517    | 140.5 | 2.6 | 150   | 12  | 545  | 82  | 141  | 3  | 6.33  |
| Zircon-004       | 223   | 152   | 0.6816 | 0.0736 | 0.0038 | 0.918  | 0.047  | 0.0901  | 0.0018  | 0.0323  | 0.0016  | -0.089877  | 556   | 10  | 659   | 24  | 1038 | 67  | 556  | 10 | 15.63 |
| Zircon-005       | 992   | 859   | 0.8659 | 0.0504 | 0.0023 | 0.1561 | 0.0074 | 0.02268 | 0.00042 | 0.0073  | 0.00034 | 0.37709    | 144.6 | 2.7 | 148.4 | 6.5 | 258  | 52  | 145  | 3  | 2.56  |
| Zircon-006       | 111.8 | 47.3  | 0.4231 | 0.0557 | 0.0065 | 0.153  | 0.017  | 0.02008 | 0.00062 | 0.00773 | 0.0007  | -0.022632  | 128.1 | 3.9 | 146   | 14  | 580  | 130 | 128  | 4  | 12.26 |
| Zircon-007       | 568   | 510   | 0.8979 | 0.0526 | 0.0032 | 0.235  | 0.015  | 0.03268 | 0.00065 | 0.01041 | 0.00058 | -0.10364   | 207.3 | 4   | 216   | 12  | 327  | 80  | 207  | 4  | 4.03  |
| Zircon-008       | 187.5 | 114.3 | 0.6096 | 0.0501 | 0.0036 | 0.14   | 0.011  | 0.02011 | 0.00048 | 0.00596 | 0.00039 | 0.074683   | 128.3 | 3.1 | 132.5 | 9.7 | 295  | 69  | 128  | 3  | 3.17  |
| Zircon-009       | 242   | 103.4 | 0.4273 | 0.054  | 0.0048 | 0.191  | 0.017  | 0.02552 | 0.00069 | 0.00799 | 0.00072 | 0.25344    | 162.5 | 4.3 | 177   | 14  | 386  | 88  | 163  | 4  | 8.19  |
| Zircon-010       | 91.9  | 26.1  | 0.284  | 0.0781 | 0.0035 | 1.922  | 0.094  | 0.1813  | 0.0033  | 0.0621  | 0.0038  | 0.21587    | 1074  | 18  | 1090  | 32  | 1135 | 45  | 1135 | 45 | 1.47  |
| Zircon-011       | 312   | 100.9 | 0.3234 | 0.0723 | 0.0026 | 1.742  | 0.071  | 0.173   | 0.0027  | 0.0527  | 0.0025  | 0.40235    | 1029  | 15  | 1023  | 26  | 1000 | 37  | 1000 | 37 | -0.59 |
| Zircon-012       | 659   | 242   | 0.3672 | 0.0525 | 0.0024 | 0.245  | 0.012  | 0.03364 | 0.00072 | 0.01079 | 0.00063 | 0.23452    | 213.3 | 4.5 | 222   | 10  | 301  | 61  | 213  | 5  | 3.92  |
| Zircon-013       | 165.2 | 141.1 | 0.8541 | 0.0493 | 0.0056 | 0.129  | 0.016  | 0.01934 | 0.00057 | 0.00673 | 0.00048 | 0.1455     | 123.5 | 3.6 | 122   | 14  | 580  | 120 | 124  | 4  | -1.23 |
| Zircon-015       | 147.5 | 95    | 0.6441 | 0.0547 | 0.0056 | 0.158  | 0.016  | 0.02104 | 0.00054 | 0.00731 | 0.00053 | -0.49811   | 134.2 | 3.4 | 148   | 14  | 670  | 100 | 134  | 3  | 9.32  |
| Zircon-016       | 659   | 725   | 1.1002 | 0.049  | 0.0024 | 0.1388 | 0.0078 | 0.02047 | 0.00036 | 0.00655 | 0.00031 | 0.16715    | 130.7 | 2.3 | 131.8 | 6.9 | 223  | 73  | 131  | 2  | 0.83  |
| Zircon-017       | 389   | 133.1 | 0.3422 | 0.0775 | 0.0028 | 2.07   | 0.085  | 0.1935  | 0.0029  | 0.0583  | 0.0028  | 0.21158    | 1140  | 16  | 1138  | 28  | 1134 | 46  | 1134 | 46 | -0.18 |
| Zircon-018       | 592   | 282   | 0.4764 | 0.0527 | 0.0033 | 0.214  | 0.013  | 0.02992 | 0.0006  | 0.00974 | 0.00056 | -0.19046   | 190.1 | 3.7 | 198   | 11  | 371  | 64  | 190  | 4  | 3.99  |
| Zircon-019       | 213   | 122.3 | 0.5742 | 0.0638 | 0.0054 | 0.181  | 0.016  | 0.02113 | 0.00064 | 0.00888 | 0.0005  | 0.10573    | 134.8 | 4   | 168   | 13  | 671  | 79  | 135  | 4  | 19.76 |
| Zircon-020       | 138.3 | 84.5  | 0.611  | 0.0468 | 0.0056 | 0.129  | 0.016  | 0.02084 | 0.00064 | 0.0065  | 0.00049 | -0.005703  | 133   | 4.1 | 125   | 14  | 435  | 76  | 133  | 4  | -6.40 |
| Zircon-021       | 324   | 80.1  | 0.2472 | 0.0589 | 0.0023 | 0.749  | 0.033  | 0.0921  | 0.0015  | 0.0277  | 0.0015  | 0.32762    | 567.7 | 9.1 | 567   | 19  | 582  | 51  | 568  | 9  | -0.12 |
| Zircon-022       | 84    | 48.1  | 0.5726 | 0.0639 | 0.0032 | 0.988  | 0.052  | 0.1125  | 0.0021  | 0.0334  | 0.0018  | 0.034111   | 687   | 12  | 696   | 27  | 716  | 74  | 687  | 12 | 1.29  |
| Zircon-023       | 222   | 126.4 | 0.5694 | 0.0585 | 0.0025 | 0.75   | 0.04   | 0.0922  | 0.0027  | 0.0289  | 0.0018  | 0.68919    | 568   | 16  | 567   | 24  | 562  | 63  | 568  | 16 | -0.18 |
| Zircon-024       | 530   | 280   | 0.5283 | 0.0562 | 0.0031 | 0.192  | 0.012  | 0.02489 | 0.00045 | 0.00856 | 0.00045 | 0.38391    | 158.5 | 2.8 | 178.1 | 9.8 | 513  | 64  | 159  | 3  | 11.01 |
| Zircon-025       | 96.1  | 30.5  | 0.3174 | 0.0871 | 0.0036 | 2.93   | 0.13   | 0.2414  | 0.0052  | 0.0769  | 0.0041  | 0.14283    | 1394  | 27  | 1389  | 33  | 1371 | 61  | 1371 | 61 | -0.36 |
| Zircon-026       | 141   | 140.1 | 0.9936 | 0.0616 | 0.0046 | 0.34   | 0.026  | 0.03954 | 0.00093 | 0.0131  | 0.00083 | -0.024764  | 250   | 5.8 | 296   | 18  | 726  | 84  | 250  | 6  | 15.54 |
| Zircon-027       | 408   | 267   | 0.6544 | 0.0472 | 0.0032 | 0.125  | 0.0088 | 0.0193  | 0.00041 | 0.00611 | 0.00034 | 0.034262   | 123.2 | 2.6 | 120.5 | 8.3 | 350  | 98  | 123  | 3  | -2.24 |
| Zircon-028       | 648   | 98.4  | 0.1519 | 0.1194 | 0.0038 | 5.16   | 0.22   | 0.3127  | 0.0069  | 0.126   | 0.013   | 0.61396    | 1754  | 35  | 1846  | 42  | 1946 | 64  | 1946 | 64 | 4.98  |
| Zircon-029       | 142   | 109   | 0.7676 | 0.0522 | 0.0058 | 0.149  | 0.016  | 0.02137 | 0.00065 | 0.00678 | 0.00046 | -0.0090903 | 136.3 | 4.1 | 140   | 14  | 531  | 95  | 136  | 4  | 2.64  |
| Zircon-032       | 404   | 205   | 0.5074 | 0.0531 | 0.0022 | 0.371  | 0.016  | 0.04978 | 0.00085 | 0.01601 | 0.00077 | 0.18138    | 313.2 | 5.2 | 320   | 13  | 382  | 59  | 313  | 5  | 2.13  |
| Zircon-033       | 163.4 | 129   | 0.7895 | 0.0734 | 0.003  | 1.707  | 0.074  | 0.1676  | 0.0028  | 0.0508  | 0.0024  | 0.038656   | 999   | 16  | 1013  | 29  | 1053 | 46  | 1053 | 46 | 1.38  |
| Zircon-034       | 156.4 | 73.1  | 0.4674 | 0.0471 | 0.0048 | 0.144  | 0.015  | 0.0222  | 0.00058 | 0.00703 | 0.00058 | 0.0962     | 141.6 | 3.7 | 136   | 13  | 375  | 78  | 142  | 4  | -4.12 |
| Zircon-035       | 160.9 | 42.4  | 0.2635 | 0.0753 | 0.0031 | 1.751  | 0.081  | 0.1683  | 0.0029  | 0.0535  | 0.0028  | 0.063188   | 1004  | 16  | 1025  | 30  | 1079 | 47  | 1079 | 47 | 2.05  |
| Zircon-038       | 211.6 | 17.3  | 0.0818 | 0.0554 | 0.0026 | 0.577  | 0.029  | 0.0737  | 0.0014  | 0.0255  | 0.0022  | 0.27442    | 458.4 | 8.3 | 461   | 19  | 465  | 52  | 458  | 8  | 0.56  |
| Zircon-040       | 183   | 107   | 0.5847 | 0.0523 | 0.0055 | 0.143  | 0.015  | 0.01987 | 0.00063 | 0.00652 | 0.00051 | 0.05532    | 126.8 | 4   | 135   | 13  | 570  | 110 | 127  | 4  | 6.07  |
| Zircon-041       | 122.6 | 72.6  | 0.5922 | 0.0475 | 0.0049 | 0.142  | 0.016  | 0.02122 | 0.00066 | 0.00648 | 0.00057 | 0.13791    | 135.3 | 4.2 | 134   | 14  | 500  | 100 | 135  | 4  | -0.97 |
| Zircon-042       | 244.7 | 236.1 | 0.9649 | 0.0761 | 0.0028 | 1.995  | 0.085  | 0.1897  | 0.0031  | 0.0562  | 0.0026  | 0.20002    | 1120  | 17  | 1112  | 29  | 1105 | 44  | 1105 | 44 | -0.72 |
| Zircon-043       | 338   | 165   | 0.4882 | 0.0585 | 0.0042 | 0.207  | 0.016  | 0.02578 | 0.00051 | 0.00893 | 0.00058 | 0.030336   | 164.1 | 3.2 | 191   | 13  | 580  | 110 | 164  | 3  | 14.08 |
| Zircon-044       | 137   | 47.1  | 0.3438 | 0.0814 | 0.0033 | 2.32   | 0.11   | 0.2093  | 0.0038  | 0.0656  | 0.0035  | 0.37393    | 1225  | 20  | 1221  | 33  | 1219 | 57  | 1219 | 57 | -0.33 |
| Zircon-045       | 48.7  | 20.9  | 0.4292 | 0.0491 | 0.0082 | 0.126  | 0.022  | 0.01904 | 0.00092 | 0.0064  | 0.0011  | 0.058855   | 121.5 | 5.8 | 123   | 20  | 800  | 180 | 122  | 6  | 1.22  |
| Zircon-046       | 1156  | 204.8 | 0.1772 | 0.0498 | 0.0021 | 0.1765 | 0.0085 | 0.02555 | 0.00041 | 0.00796 | 0.00045 | 0.069345   | 162.6 | 2.6 | 164.9 | 7.4 | 222  | 56  | 163  | 3  | 1.39  |
| Zircon-047       | 733   | 402   | 0.5484 | 0.0525 | 0.0065 | 0.156  | 0.024  | 0.02155 | 0.00051 | 0.00685 | 0.00068 | -0.19841   | 137.5 | 3.2 | 148   | 19  | 360  | 200 | 138  | 3  | 7.09  |
| Zircon-048       | 670   | 522   | 0.7791 | 0.0496 | 0.0028 | 0.1469 | 0.0086 | 0.02119 | 0.00041 | 0.00698 | 0.00035 | -0.0056683 | 135.2 | 2.6 | 140.8 | 7.6 | 296  | 45  | 135  | 3  | 3.98  |
| Zircon-049       | 80.1  | 42    | 0.5243 | 0.0719 | 0.0034 | 1.592  | 0.093  | 0.1623  | 0.0051  | 0.0428  | 0.0025  | 0.08994    | 969   | 29  | 964   | 37  | 993  | 59  | 969  | 29 | -0.52 |
| Zircon-050       | 564   | 177.4 | 0.3145 | 0.0533 | 0.0028 | 0.305  | 0.017  | 0.04184 | 0.00074 | 0.01263 | 0.00068 | -0.031567  | 264.2 | 4.6 | 270   | 13  | 340  | 45  | 264  | 5  | 2.15  |
| Zircon-051       | 190.2 | 118.4 | 0.6225 | 0.0517 | 0.0038 | 0.238  | 0.017  | 0.03343 | 0.00075 | 0.01036 | 0.00065 | -0.17033   | 212   | 4.7 | 217   | 15  | 361  | 68  | 212  | 5  | 2.30  |

|                  |       |       |        |        |        |        |        |         |         |         |         |           |       |     |       |     |      |     |      |    |       |
|------------------|-------|-------|--------|--------|--------|--------|--------|---------|---------|---------|---------|-----------|-------|-----|-------|-----|------|-----|------|----|-------|
| Zircon-053       | 460   | 206   | 0.4478 | 0.0498 | 0.0031 | 0.1466 | 0.0097 | 0.02129 | 0.0004  | 0.00656 | 0.00038 | -0.28441  | 135.8 | 2.5 | 138.7 | 8.7 | 290  | 62  | 136  | 3  | 2.09  |
| Zircon-054       | 226   | 57.9  | 0.2562 | 0.0803 | 0.0028 | 2.325  | 0.092  | 0.2093  | 0.0033  | 0.0614  | 0.003   | 0.1367    | 1225  | 18  | 1219  | 28  | 1209 | 37  | 1209 | 37 | -0.49 |
| Zircon-055       | 78.3  | 41.7  | 0.5326 | 0.0616 | 0.0034 | 0.698  | 0.046  | 0.0817  | 0.0017  | 0.0243  | 0.0016  | 0.22497   | 505.9 | 9.9 | 534   | 27  | 672  | 76  | 506  | 10 | 5.26  |
| Zircon-056       | 151.8 | 114.7 | 0.7556 | 0.0576 | 0.0037 | 0.21   | 0.015  | 0.02638 | 0.00067 | 0.0086  | 0.00053 | 0.098166  | 167.8 | 4.2 | 193   | 12  | 517  | 90  | 168  | 4  | 13.06 |
| Zircon-057       | 116.4 | 52.2  | 0.4485 | 0.1279 | 0.0045 | 6.69   | 0.27   | 0.3777  | 0.006   | 0.107   | 0.0051  | 0.11839   | 2065  | 28  | 2070  | 35  | 2069 | 42  | 2069 | 42 | 0.24  |
| Zircon-058       | 874   | 170.5 | 0.1951 | 0.0557 | 0.002  | 0.57   | 0.024  | 0.0741  | 0.0011  | 0.0235  | 0.0012  | -0.034508 | 460.7 | 6.8 | 457   | 15  | 434  | 47  | 461  | 7  | -0.81 |
| Zircon-059       | 154.3 | 78    | 0.5055 | 0.0534 | 0.003  | 0.297  | 0.017  | 0.04058 | 0.00086 | 0.0122  | 0.00077 | -0.22422  | 256.4 | 5.3 | 264   | 13  | 403  | 59  | 256  | 5  | 2.88  |
| Zircon-060       | 328   | 201.5 | 0.6143 | 0.0522 | 0.0037 | 0.149  | 0.011  | 0.02076 | 0.00043 | 0.00621 | 0.00038 | -0.14135  | 132.5 | 2.7 | 140.3 | 9.7 | 422  | 86  | 133  | 3  | 5.56  |
| Zircon-061       | 223   | 77.9  | 0.3493 | 0.0536 | 0.0038 | 0.184  | 0.013  | 0.02565 | 0.00051 | 0.00837 | 0.00058 | -0.12404  | 163.3 | 3.2 | 173   | 11  | 346  | 89  | 163  | 3  | 5.61  |
| Zircon-062       | 87.9  | 39.9  | 0.4539 | 0.058  | 0.0052 | 0.413  | 0.037  | 0.0544  | 0.0014  | 0.0196  | 0.0017  | 0.25882   | 341.2 | 8.6 | 348   | 26  | 478  | 96  | 341  | 9  | 1.95  |
| Zircon-063       | 395   | 100.2 | 0.2537 | 0.074  | 0.0026 | 1.858  | 0.076  | 0.1804  | 0.003   | 0.0531  | 0.0027  | 0.29497   | 1069  | 16  | 1065  | 26  | 1044 | 33  | 1044 | 33 | -0.38 |
| Zircon-064       | 102.8 | 57.7  | 0.5613 | 0.0559 | 0.0078 | 0.2    | 0.03   | 0.02612 | 0.00084 | 0.0088  | 0.001   | 0.15829   | 166.2 | 5.3 | 184   | 24  | 480  | 170 | 166  | 5  | 9.67  |
| Zircon-065       | 622   | 203   | 0.3264 | 0.0755 | 0.0025 | 1.846  | 0.074  | 0.1781  | 0.0027  | 0.0512  | 0.0025  | -0.063633 | 1057  | 15  | 1062  | 26  | 1074 | 45  | 1074 | 45 | 0.47  |
| Zircon-066       | 648   | 699   | 1.0787 | 0.0568 | 0.0029 | 0.1522 | 0.0082 | 0.0196  | 0.00038 | 0.00603 | 0.0003  | 0.0083729 | 125.1 | 2.4 | 143.7 | 7.2 | 500  | 56  | 125  | 2  | 12.94 |
| Zircon-067       | 110   | 76.2  | 0.6927 | 0.0537 | 0.0041 | 0.255  | 0.019  | 0.0348  | 0.0011  | 0.01058 | 0.00067 | -0.30796  | 220.6 | 7   | 229   | 15  | 451  | 75  | 221  | 7  | 3.67  |
| Zircon-068       | 1057  | 741   | 0.701  | 0.0485 | 0.0022 | 0.1382 | 0.0064 | 0.02062 | 0.00038 | 0.0063  | 0.00031 | -0.030543 | 131.5 | 2.4 | 131.3 | 5.8 | 199  | 43  | 132  | 2  | -0.15 |
| Zircon-069       | 208   | 146.6 | 0.7048 | 0.0524 | 0.0046 | 0.163  | 0.015  | 0.02219 | 0.00062 | 0.00726 | 0.00051 | -0.10697  | 141.5 | 3.9 | 152   | 13  | 488  | 94  | 142  | 4  | 6.91  |
| Zircon-070       | 63.4  | 29.7  | 0.4685 | 0.0736 | 0.0034 | 1.792  | 0.088  | 0.1774  | 0.0037  | 0.0529  | 0.0032  | 0.28859   | 1052  | 20  | 1040  | 32  | 1033 | 49  | 1033 | 49 | -1.15 |
| Zircon-071       | 170   | 92    | 0.5412 | 0.0793 | 0.0033 | 2.27   | 0.11   | 0.2074  | 0.0038  | 0.0638  | 0.0036  | 0.3608    | 1215  | 20  | 1201  | 33  | 1179 | 51  | 1179 | 51 | -1.17 |
| Zircon-072       | 92.6  | 36.2  | 0.3909 | 0.0712 | 0.0034 | 1.651  | 0.085  | 0.1671  | 0.0031  | 0.0483  | 0.0026  | 0.17567   | 996   | 17  | 987   | 33  | 950  | 47  | 996  | 17 | -0.91 |
| Zircon-073       | 196.6 | 65.6  | 0.3337 | 0.0557 | 0.005  | 0.147  | 0.013  | 0.02038 | 0.00051 | 0.00731 | 0.00063 | 0.19542   | 130.1 | 3.2 | 142   | 12  | 524  | 94  | 130  | 3  | 8.38  |
| Zircon-074       | 349   | 170.7 | 0.4891 | 0.0594 | 0.0026 | 0.61   | 0.031  | 0.0755  | 0.0013  | 0.0245  | 0.0013  | 0.49884   | 469.1 | 7.8 | 483   | 20  | 588  | 55  | 469  | 8  | 2.88  |
| Zircon-075       | 151   | 83.9  | 0.5556 | 0.0498 | 0.0044 | 0.155  | 0.015  | 0.0223  | 0.00069 | 0.00813 | 0.00066 | -0.12022  | 142.2 | 4.3 | 145   | 13  | 610  | 140 | 142  | 4  | 1.93  |
| Zircon-076       | 113.6 | 175   | 1.5405 | 0.0626 | 0.0036 | 0.978  | 0.078  | 0.1122  | 0.0039  | 0.0344  | 0.0021  | 0.59533   | 688   | 22  | 692   | 39  | 720  | 86  | 688  | 22 | 0.58  |
| Zircon-077_SL-67 | 144   | 27.6  | 0.1917 | 0.0477 | 0.0045 | 0.136  | 0.012  | 0.02047 | 0.00057 | 0.00671 | 0.00071 | 0.20458   | 130.6 | 3.6 | 131   | 11  | 345  | 98  | 131  | 4  | 0.31  |

#### Cuestecita Formation SL45

|                  |       |       |        |        |        |        |        |         |         |         |         |            |       |     |       |     |      |     |      |    |       |
|------------------|-------|-------|--------|--------|--------|--------|--------|---------|---------|---------|---------|------------|-------|-----|-------|-----|------|-----|------|----|-------|
| Zircon-078_SL-45 | 106.2 | 43.1  | 0.4058 | 0.0525 | 0.0066 | 0.151  | 0.017  | 0.02127 | 0.0007  | 0.00748 | 0.00062 | -0.031322  | 135.6 | 4.4 | 142   | 15  | 775  | 90  | 136  | 4  | 4.51  |
| Zircon-079       | 97.3  | 19.58 | 0.2012 | 0.0747 | 0.0038 | 1.724  | 0.09   | 0.167   | 0.0031  | 0.0549  | 0.0035  | 0.092128   | 995   | 17  | 1018  | 35  | 1052 | 65  | 1052 | 65 | 2.26  |
| Zircon-080       | 205.1 | 64.5  | 0.3145 | 0.0512 | 0.0045 | 0.193  | 0.017  | 0.02768 | 0.00064 | 0.00866 | 0.00061 | -0.19491   | 176   | 4   | 178   | 14  | 434  | 99  | 176  | 4  | 1.12  |
| Zircon-081       | 563   | 283   | 0.5027 | 0.0496 | 0.003  | 0.128  | 0.0079 | 0.01875 | 0.00035 | 0.00633 | 0.00035 | 0.10106    | 119.8 | 2.2 | 123.1 | 6.8 | 260  | 61  | 120  | 2  | 2.68  |
| Zircon-082       | 383   | 194   | 0.5065 | 0.0522 | 0.0031 | 0.1464 | 0.009  | 0.02023 | 0.0005  | 0.00761 | 0.0005  | 0.18367    | 129.1 | 3.2 | 138.4 | 8   | 308  | 57  | 129  | 3  | 6.72  |
| Zircon-083       | 289   | 185   | 0.6401 | 0.0541 | 0.0041 | 0.156  | 0.012  | 0.02133 | 0.00057 | 0.00722 | 0.00044 | -0.18317   | 136   | 3.6 | 146.7 | 9.9 | 501  | 88  | 136  | 4  | 7.29  |
| Zircon-084       | 311   | 99.1  | 0.3186 | 0.051  | 0.003  | 0.181  | 0.011  | 0.02544 | 0.00053 | 0.00794 | 0.00061 | -0.011688  | 162   | 3.3 | 168.4 | 9.5 | 274  | 65  | 162  | 3  | 3.80  |
| Zircon-085       | 263   | 228   | 0.8669 | 0.0522 | 0.0038 | 0.156  | 0.011  | 0.02189 | 0.00047 | 0.0068  | 0.00039 | -0.041281  | 139.6 | 2.9 | 146.5 | 9.7 | 458  | 80  | 140  | 3  | 4.71  |
| Zircon-086       | 262.6 | 111.3 | 0.4238 | 0.0515 | 0.0032 | 0.238  | 0.016  | 0.03344 | 0.00069 | 0.01126 | 0.0007  | 0.14047    | 212   | 4.3 | 216   | 13  | 316  | 60  | 212  | 4  | 1.85  |
| Zircon-087       | 321   | 191.2 | 0.5956 | 0.0918 | 0.0031 | 3.28   | 0.13   | 0.2589  | 0.0041  | 0.0792  | 0.0037  | 0.20576    | 1484  | 21  | 1479  | 30  | 1463 | 39  | 1463 | 39 | -0.34 |
| Zircon-088       | 1147  | 675   | 0.5885 | 0.054  | 0.0026 | 0.1638 | 0.0078 | 0.02153 | 0.00058 | 0.0075  | 0.00042 | 0.26984    | 137.3 | 3.7 | 153.9 | 6.9 | 409  | 64  | 137  | 4  | 10.79 |
| Zircon-089       | 380   | 252   | 0.6632 | 0.0462 | 0.0028 | 0.136  | 0.0084 | 0.02101 | 0.00045 | 0.00663 | 0.00038 | 0.024147   | 134   | 2.9 | 129.2 | 7.5 | 274  | 66  | 134  | 3  | -3.72 |
| Zircon-090       | 131.5 | 47.2  | 0.3589 | 0.054  | 0.0054 | 0.189  | 0.018  | 0.02604 | 0.00067 | 0.00909 | 0.00066 | -0.36639   | 165.7 | 4.2 | 174   | 16  | 560  | 100 | 166  | 4  | 4.77  |
| Zircon-091       | 222.6 | 165.4 | 0.743  | 0.0548 | 0.0043 | 0.153  | 0.012  | 0.02002 | 0.00053 | 0.00652 | 0.0004  | -0.10175   | 127.8 | 3.3 | 144   | 10  | 445  | 75  | 128  | 3  | 11.25 |
| Zircon-092       | 250   | 69    | 0.276  | 0.0602 | 0.0069 | 0.351  | 0.031  | 0.0419  | 0.0014  | 0.0127  | 0.0022  | 0.23897    | 264.3 | 8.4 | 305   | 22  | 630  | 150 | 264  | 8  | 13.34 |
| Zircon-093       | 263   | 142.4 | 0.5414 | 0.0494 | 0.0036 | 0.175  | 0.013  | 0.02526 | 0.00055 | 0.00834 | 0.00051 | -0.16599   | 160.8 | 3.5 | 163   | 11  | 353  | 76  | 161  | 4  | 1.35  |
| Zircon-094       | 307   | 110.7 | 0.3606 | 0.0524 | 0.0035 | 0.147  | 0.01   | 0.02    | 0.00043 | 0.00663 | 0.00043 | -0.15274   | 127.7 | 2.7 | 138.6 | 9.1 | 392  | 77  | 128  | 3  | 7.86  |
| Zircon-095       | 362   | 274   | 0.7569 | 0.0589 | 0.0039 | 0.18   | 0.012  | 0.02201 | 0.00052 | 0.00758 | 0.00054 | 0.23443    | 140.3 | 3.3 | 168   | 11  | 515  | 83  | 140  | 3  | 16.49 |
| Zircon-096       | 360   | 206   | 0.5722 | 0.0628 | 0.0025 | 0.924  | 0.041  | 0.1079  | 0.0019  | 0.0347  | 0.0016  | 0.2986     | 661   | 11  | 667   | 21  | 715  | 49  | 661  | 11 | 0.90  |
| Zircon-097       | 287.1 | 219.4 | 0.7642 | 0.0556 | 0.0048 | 0.156  | 0.015  | 0.02023 | 0.00052 | 0.00628 | 0.00049 | 0.25333    | 129.1 | 3.3 | 147   | 13  | 460  | 110 | 129  | 3  | 12.18 |
| Zircon-098       | 421   | 277.3 | 0.6587 | 0.0667 | 0.0031 | 0.374  | 0.019  | 0.03981 | 0.00082 | 0.0154  | 0.00073 | 0.090304   | 251.6 | 5.1 | 325   | 14  | 862  | 48  | 252  | 5  | 22.58 |
| Zircon-099       | 369   | 301   | 0.8157 | 0.0522 | 0.0031 | 0.283  | 0.017  | 0.03938 | 0.00077 | 0.01241 | 0.00068 | -0.0033953 | 249   | 4.7 | 252   | 14  | 322  | 62  | 249  | 5  | 1.19  |
| Zircon-100       | 271   | 132   | 0.4871 | 0.0733 | 0.0026 | 1.651  | 0.071  | 0.166   | 0.0035  | 0.0533  | 0.0025  | 0.74194    | 990   | 20  | 990   | 29  | 1017 | 42  | 1017 | 42 | 0.00  |
| Zircon-101       | 188   | 152   | 0.8085 | 0.0579 | 0.0054 | 0.17   | 0.017  | 0.02123 | 0.0007  | 0.00672 | 0.00043 | 0.087799   | 135.4 | 4.4 | 158   | 15  | 710  | 120 | 135  | 4  | 14.30 |
| Zircon101        | 597   | 432   | 0.7236 | 0.0585 | 0.0031 | 0.1527 | 0.0093 | 0.01872 | 0.0004  | 0.00643 | 0.00034 | 0.51568    | 119.5 | 2.5 | 144   | 8.2 | 533  | 82  | 120  | 3  | 17.01 |
| Zircon102        | 394   | 232   | 0.5888 | 0.0537 | 0.0036 | 0.155  | 0.011  | 0.02129 | 0.00053 | 0.00728 | 0.00039 | 0.27783    | 135.8 | 3.3 | 147   | 10  | 371  | 73  | 136  | 3  | 7.62  |
| Zircon103        | 115.8 | 68.3  | 0.5898 | 0.0654 | 0.0063 | 0.192  | 0.019  | 0.02133 | 0.00065 | 0.00797 | 0.00066 | 0.080076   | 136   | 4.1 | 177   | 16  | 920  | 170 | 136  | 4  | 23.16 |
| Zircon105        | 127.1 | 83.9  | 0.6601 | 0.0631 | 0.0077 | 0.181  | 0.023  | 0.02105 | 0.00063 | 0.00761 | 0.00068 | 0.13503    | 134.3 | 4   | 169   | 19  | 820  | 150 | 134  | 4  | 20.53 |
| Zircon106        | 338   | 154.1 | 0.4559 | 0.0635 | 0.0027 | 0.67   | 0.029  | 0.0763  | 0.0014  | 0.0256  | 0.0013  | -0.041437  | 474   | 8.5 | 522   | 19  | 707  | 46  | 474  | 9  | 9.20  |
| Zircon107        | 105.2 | 58.7  | 0.558  | 0.0583 | 0.0064 | 0.173  | 0.018  | 0.02197 | 0.00066 | 0.00723 | 0.00061 | -0.089171  | 140.1 | 4.2 | 161   | 16  | 670  | 110 | 140  | 4  | 12.98 |
| Zircon108        | 252   | 204   | 0.8095 | 0.0521 | 0.0044 | 0.18   | 0.015  | 0.02513 | 0.00059 | 0.00734 | 0.00038 | 0.030915   | 160   | 3.7 | 167   | 13  | 424  | 72  | 160  | 4  | 4.19  |
| Zircon109        | 110.7 | 56.8  | 0.5131 | 0.0578 | 0.007  | 0.174  | 0.021  | 0.02169 | 0.00064 | 0.00715 | 0.00068 | -0.068565  | 138.3 | 4   | 163   | 18  | 740  | 130 | 138  | 4  | 15.15 |

## Las Trancas Formation T13-03

| CORRECTED RATIOS |          |       |             |         |            |         |            |         |             |         |         | CORRECTED AGES (Ma) |      |            |      |             |      |             |      |               |      |    |  |
|------------------|----------|-------|-------------|---------|------------|---------|------------|---------|-------------|---------|---------|---------------------|------|------------|------|-------------|------|-------------|------|---------------|------|----|--|
| U (ppm)          | Th (ppm) | Th/U  | 207Pb/206Pb | ±1s     | 207Pb/235U | ±1s     | 206Pb/238U | ±1s     | 208Pb/232Th | ±1s     | Rho     | 206Pb/238U          | ±1s  | 207Pb/235U | ±1s  | 207Pb/206Pb | ±1s  | 208Pb/232Th | ±1s  | Best age (Ma) | ±1s  |    |  |
| Zircon_001_T1303 | 307.7    | 92.3  | 0.30        | 0.0674  | 0.0028     | 0.18243 | 0.00817    | 0.01963 | 0.00026     | 0.00598 | 0.00008 | 0.27                | 125  | 2          | 170  | 7           | 850  | 87          | 121  | 2             | 125  | 2  |  |
| Zircon_002       | 223.5    | 57.8  | 0.26        | 0.0727  | 0.00175    | 1.639   | 0.039      | 0.1653  | 0.0021      | 0.0484  | 0.00165 | 0.25                | 986  | 12         | 985  | 15          | 1006 | 49          | 955  | 32            | 986  | 12 |  |
| Zircon_005       | 238.8    | 35.8  | 0.15        | 0.0707  | 0.0033     | 1.102   | 0.0435     | 0.1137  | 0.0046      | 0.0145  | 0.0017  | 0.32                | 694  | 27         | 754  | 21          | 949  | 96          | 291  | 34            | 694  | 27 |  |
| Zircon_006       | 966      | 323   | 0.33        | 0.0569  | 0.0019     | 0.162   | 0.0055     | 0.02091 | 0.00027     | 0.00661 | 0.00024 | 0.23                | 133  | 2          | 152  | 5           | 488  | 74          | 133  | 5             | 133  | 2  |  |
| Zircon_007       | 1860     | 700   | 0.38        | 0.0521  | 0.00185    | 0.144   | 0.007      | 0.0208  | 0.00039     | 0.0065  | 0.00027 | 0.8                 | 133  | 2          | 137  | 6           | 290  | 82          | 131  | 5             | 133  | 2  |  |
| Zircon_008       | 2380     | 871   | 0.37        | 0.0559  | 0.0047     | 0.157   | 0.0115     | 0.02085 | 0.00027     | 0.008   | 0.00055 | -0.81               | 133  | 2          | 148  | 10          | 448  | 189         | 161  | 11            | 133  | 2  |  |
| Zircon_010       | 137.5    | 42.3  | 0.31        | 0.0836  | 0.002      | 2.35    | 0.06       | 0.2038  | 0.0027      | 0.0558  | 0.0021  | 0.38                | 1196 | 14         | 1228 | 18          | 1283 | 47          | 1097 | 40            | 1283 | 47 |  |
| Zircon_011       | 865.1    | 562   | 0.65        | 0.06309 | 0.00411    | 0.17104 | 0.01247    | 0.01966 | 0.00029     | 0.00604 | 0.00008 | 0.33                | 126  | 2          | 160  | 11          | 711  | 140         | 122  | 2             | 126  | 2  |  |
| Zircon_012       | 515      | 120.2 | 0.23        | 0.06336 | 0.00204    | 0.18112 | 0.00623    | 0.02073 | 0.00025     | 0.00636 | 0.00008 | 0.24                | 132  | 2          | 169  | 5           | 720  | 66          | 128  | 2             | 132  | 2  |  |
| Zircon_013       | 173      | 73.1  | 0.42        | 0.0809  | 0.0019     | 2.23    | 0.055      | 0.2024  | 0.00285     | 0.0569  | 0.002   | 0.37                | 1188 | 15         | 1191 | 17          | 1219 | 45          | 1119 | 38            | 1219 | 45 |  |
| Zircon_014       | 739      | 88.8  | 0.12        | 0.0555  | 0.00145    | 0.299   | 0.0075     | 0.0398  | 0.00065     | 0.0186  | 0.0007  | 0.26                | 252  | 4          | 266  | 6           | 432  | 56          | 372  | 14            | 252  | 4  |  |
| Zircon_015       | 718      | 362   | 0.50        | 0.0675  | 0.00215    | 0.177   | 0.005      | 0.01941 | 0.00025     | 0.00599 | 0.00021 | -0.07               | 124  | 2          | 165  | 4           | 853  | 64          | 121  | 4             | 124  | 2  |  |
| Zircon_016       | 158      | 73    | 0.46        | 0.0755  | 0.0021     | 2.09    | 0.205      | 0.204   | 0.0155      | 0.055   | 0.006   | 0.98                | 1197 | 83         | 1146 | 67          | 1082 | 54          | 1082 | 115           | 1082 | 54 |  |
| Zircon_017       | 665      | 297.1 | 0.45        | 0.0553  | 0.0016     | 0.1523  | 0.0049     | 0.02053 | 0.0003      | 0.00642 | 0.00023 | 0.44                | 131  | 2          | 144  | 4           | 424  | 62          | 129  | 5             | 131  | 2  |  |
| Zircon_018       | 371      | 145.4 | 0.39        | 0.0628  | 0.00335    | 0.178   | 0.0095     | 0.02077 | 0.00035     | 0.00688 | 0.00031 | 0.16                | 133  | 2          | 166  | 8           | 701  | 110         | 139  | 6             | 133  | 2  |  |
| Zircon_019       | 324.4    | 177.5 | 0.55        | 0.0715  | 0.0022     | 0.209   | 0.006      | 0.02135 | 0.00031     | 0.00694 | 0.00026 | 0.11                | 136  | 2          | 193  | 5           | 972  | 60          | 140  | 5             | 136  | 2  |  |
| Zircon_020       | 532      | 272.7 | 0.51        | 0.0703  | 0.00325    | 0.205   | 0.0095     | 0.02167 | 0.00033     | 0.00686 | 0.0003  | 0.17                | 138  | 2          | 189  | 8           | 937  | 91          | 138  | 6             | 138  | 2  |  |
| Zircon_021       | 322      | 144   | 0.45        | 0.0697  | 0.00275    | 0.203   | 0.008      | 0.02131 | 0.0003      | 0.00612 | 0.00025 | 0.18                | 136  | 2          | 188  | 7           | 920  | 78          | 123  | 5             | 136  | 2  |  |
| Zircon_023       | 630      | 280   | 0.44        | 0.0555  | 0.00155    | 0.1573  | 0.0042     | 0.02086 | 0.00028     | 0.00611 | 0.00022 | 0.16                | 133  | 2          | 148  | 4           | 432  | 60          | 123  | 4             | 133  | 2  |  |
| Zircon_024       | 216      | 65.2  | 0.30        | 0.07072 | 0.00305    | 0.20025 | 0.01025    | 0.02054 | 0.00031     | 0.00622 | 0.00009 | 0.44                | 131  | 2          | 185  | 9           | 949  | 85          | 125  | 2             | 131  | 2  |  |
| Zircon_026       | 443      | 183.6 | 0.41        | 0.05681 | 0.00249    | 0.16649 | 0.0086     | 0.02125 | 0.00033     | 0.00661 | 0.0001  | 0.31                | 136  | 2          | 156  | 7           | 484  | 93          | 133  | 2             | 136  | 2  |  |
| Zircon_027       | 284.5    | 125.6 | 0.44        | 0.0709  | 0.00295    | 0.205   | 0.0085     | 0.02132 | 0.00031     | 0.00685 | 0.00026 | 0.17                | 136  | 2          | 189  | 7           | 955  | 82          | 138  | 5             | 136  | 2  |  |
| Zircon_028       | 661      | 237   | 0.36        | 0.0518  | 0.0015     | 0.1475  | 0.00405    | 0.02061 | 0.00027     | 0.00635 | 0.00023 | 0.12                | 132  | 2          | 140  | 4           | 277  | 64          | 128  | 5             | 132  | 2  |  |
| Zircon_029       | 930      | 318   | 0.34        | 0.05927 | 0.0022     | 0.16966 | 0.00726    | 0.02076 | 0.00027     | 0.00642 | 0.00008 | 0.27                | 132  | 2          | 159  | 6           | 577  | 78          | 129  | 2             | 132  | 2  |  |
| Zircon_030       | 853      | 439   | 0.51        | 0.0618  | 0.00185    | 0.165   | 0.00485    | 0.02014 | 0.00027     | 0.00621 | 0.00024 | 0.19                | 129  | 2          | 155  | 4           | 667  | 62          | 125  | 5             | 129  | 2  |  |
| Zircon_031       | 375      | 112.2 | 0.30        | 0.0698  | 0.0023     | 0.195   | 0.0065     | 0.02075 | 0.00028     | 0.00689 | 0.00029 | 0.23                | 132  | 2          | 181  | 6           | 922  | 65          | 139  | 6             | 132  | 2  |  |
| Zircon_032       | 334.8    | 152.3 | 0.45        | 0.0624  | 0.0024     | 0.184   | 0.007      | 0.02142 | 0.00028     | 0.00678 | 0.00027 | 0.14                | 137  | 2          | 171  | 6           | 688  | 79          | 137  | 5             | 137  | 2  |  |
| Zircon_033       | 204.8    | 68.6  | 0.33        | 0.06229 | 0.00307    | 0.18298 | 0.00997    | 0.02131 | 0.00033     | 0.00655 | 0.0001  | 0.15                | 136  | 2          | 171  | 9           | 684  | 101         | 132  | 2             | 136  | 2  |  |
| Zircon_034       | 672      | 304.6 | 0.45        | 0.0707  | 0.00155    | 1.461   | 0.032      | 0.1513  | 0.0018      | 0.036   | 0.0012  | 0.27                | 908  | 10         | 914  | 13          | 949  | 43          | 715  | 23            | 908  | 10 |  |
| Zircon_035       | 308.4    | 119.3 | 0.39        | 0.06843 | 0.00274    | 0.19619 | 0.00835    | 0.02079 | 0.00029     | 0.00633 | 0.00009 | -0.07               | 133  | 2          | 182  | 7           | 882  | 80          | 127  | 2             | 133  | 2  |  |
| Zircon_037       | 409      | 143.8 | 0.35        | 0.06144 | 0.0025     | 0.18632 | 0.00858    | 0.02199 | 0.00035     | 0.00677 | 0.00011 | 0.13                | 140  | 2          | 173  | 7           | 655  | 84          | 136  | 2             | 140  | 2  |  |
| Zircon_038       | 577      | 209.3 | 0.36        | 0.0639  | 0.00195    | 0.186   | 0.0055     | 0.02121 | 0.00029     | 0.00681 | 0.00027 | 0.16                | 135  | 2          | 173  | 5           | 738  | 62          | 137  | 5             | 135  | 2  |  |
| Zircon_039       | 377.3    | 202   | 0.54        | 0.05486 | 0.00341    | 0.15763 | 0.01096    | 0.02084 | 0.00033     | 0.0065  | 0.0001  | 0.18                | 133  | 2          | 149  | 10          | 407  | 135         | 131  | 2             | 133  | 2  |  |
| Zircon_040       | 326.4    | 132.1 | 0.40        | 0.06963 | 0.00284    | 0.21013 | 0.00954    | 0.02189 | 0.00032     | 0.00665 | 0.0001  | 0.08                | 140  | 2          | 194  | 8           | 918  | 81          | 134  | 2             | 140  | 2  |  |
| Zircon_044       | 972      | 499   | 0.51        | 0.0486  | 0.0014     | 0.1425  | 0.00435    | 0.02084 | 0.00029     | 0.00629 | 0.00022 | 0.35                | 133  | 2          | 135  | 4           | 129  | 65          | 127  | 4             | 133  | 2  |  |
| Zircon_047       | 270      | 108.7 | 0.40        | 0.0685  | 0.0034     | 0.177   | 0.0095     | 0.02039 | 0.00031     | 0.00672 | 0.00031 | 0.4                 | 130  | 2          | 165  | 8           | 884  | 99          | 135  | 6             | 130  | 2  |  |
| Zircon_051       | 181.5    | 120.3 | 0.66        | 0.07027 | 0.01198    | 0.19335 | 0.03813    | 0.01996 | 0.00071     | 0.00605 | 0.0002  | 0.65                | 127  | 5          | 179  | 32          | 936  | 350         | 122  | 4             | 127  | 5  |  |
| Zircon_052       | 474      | 193.2 | 0.41        | 0.0505  | 0.00215    | 0.153   | 0.006      | 0.02072 | 0.00028     | 0.00663 | 0.00028 | -0.09               | 132  | 2          | 145  | 5           | 218  | 95          | 134  | 6             | 132  | 2  |  |
| Zircon_053       | 153      | 49.9  | 0.33        | 0.0778  | 0.00195    | 1.863   | 0.0465     | 0.1725  | 0.00215     | 0.0491  | 0.0017  | 0.24                | 1026 | 12         | 1068 | 16          | 1142 | 48          | 969  | 33            | 1142 | 48 |  |
| Zircon_054       | 33.2     | 15.5  | 0.47        | 0.0748  | 0.00215    | 1.8     | 0.06       | 0.1726  | 0.003       | 0.0515  | 0.0019  | 0.51                | 1026 | 16         | 1045 | 22          | 1063 | 56          | 1015 | 37            | 1063 | 56 |  |
| Zircon_055       | 233      | 105   | 0.45        | 0.067   | 0.0065     | 0.193   | 0.0235     | 0.0203  | 0.00055     | 0.00676 | 0.00045 | 0.93                | 130  | 3          | 179  | 20          | 838  | 197         | 136  | 9             | 130  | 3  |  |
| Zircon_056       | 167.7    | 104.7 | 0.62        | 0.0764  | 0.00215    | 1.168   | 0.0375     | 0.1105  | 0.00235     | 0.0151  | 0.0008  | 0.51                | 676  | 14         | 786  | 18          | 1106 | 54          | 303  | 16            | 676  | 14 |  |
| Zircon_057       | 480      | 199.5 | 0.42        | 0.0589  | 0.00205    | 0.171   | 0.0055     | 0.0208  | 0.00028     | 0.00622 | 0.00025 | 0.01                | 133  | 2          | 160  | 5           | 563  | 73          | 125  | 5             | 133  | 2  |  |
| Zircon_059       | 384      | 238   | 0.62        | 0.064   | 0.0022     | 0.188   | 0.0065     | 0.02117 | 0.0003      | 0.00597 | 0.00027 | 0.22                | 135  | 2          | 175  | 6           | 742  | 70          | 120  | 5             | 135  | 2  |  |
| Zircon_63        | 343      | 132   | 0.38        | 0.0522  | 0.0019     | 0.153   | 0.0055     | 0.02088 | 0.00028     | 0.00639 | 0.00024 | 0.15                | 133  | 2          | 145  | 5           | 294  | 80          | 129  | 5             | 133  | 2  |  |
| Zircon_64        | 2585     | 700.6 | 0.27        | 0.0491  | 0.00115    | 0.1411  | 0.00335    | 0.02063 | 0.00025     | 0.00632 | 0.00022 | 0.28                | 132  | 2          | 134  | 3           | 153  | 53          | 127  | 4             | 132  | 2  |  |
| Zircon_65        | 285      | 134.7 | 0.47        | 0.0634  | 0.0022     | 0.189   | 0.0065     | 0.02084 | 0.00029     | 0.00669 | 0.00025 | 0.18                | 133  | 2          | 176  | 6           | 722  | 71          | 135  | 5             | 133  | 2  |  |
| Zircon_066       | 159      | 60.9  | 0.38        | 0.07005 | 0.00336    | 0.21099 | 0.01106    | 0.02184 | 0.00035     | 0.00663 | 0.00011 | 0.03                | 139  | 2          | 194  | 9           | 930  | 95          | 134  | 2             | 139  | 2  |  |
| Zircon_070       | 609      | 218.4 | 0.36        | 0.05445 | 0.00205    | 0.15293 | 0.00652    | 0.02037 | 0.00028     | 0.00636 | 0.00009 | 0.14                | 130  | 2          | 144  | 6           | 390  | 81          | 128  | 2             | 130  | 2  |  |
| Zircon_071       | 1598     | 440   | 0.28        | 0.0514  | 0.00135    | 0.1483  | 0.0038     | 0.02061 | 0.00027     | 0.00623 | 0.00023 | 0.21                | 132  | 2          | 140  | 3           | 259  | 58          | 126  | 5             | 132  | 2  |  |
| Zircon_073       | 174.7    | 105.5 | 0.60        | 0.0666  | 0.0036     | 0.199   | 0.0115     | 0.02116 | 0.00033     | 0.00605 | 0.0003  | 0.37                | 135  | 2          | 184  | 10          | 825  | 109         | 122  | 6             | 135  | 2  |  |
| Zircon_074       | 326      | 177   | 0.54        | 0.0574  | 0.00185    | 0.166   | 0.005      | 0.02061 | 0.00028     | 0.00645 | 0.00023 | 0.06                | 132  | 2          | 156  | 4           | 507  | 68          | 130  | 5             | 132  | 2  |  |
| Zircon_075       | 342      | 107   | 0.31        | 0.0713  | 0.00195    | 0.88    | 0.0345     | 0.0882  | 0.00275     | 0.027   | 0.00135 | 0.72                | 545  | 16         | 641  | 19          | 966  | 54          | 538  | 27            | 545  | 16 |  |
| Zircon_077       | 1550     | 442   | 0.29        | 0.0563  | 0.00175    | 0.166   | 0.005      | 0.02114 | 0.00026     | 0.00698 | 0.00037 | 0.12                | 135  | 2          | 156  | 4           | 464  | 63          | 141  | 7             | 135  | 2  |  |
| Zircon_078       | 865      | 358   | 0.41        | 0.0534  | 0.00225    | 0.16    | 0.0075     | 0.02161 | 0.00041     | 0.00667 | 0.00032 | 0.44                | 138  | 3          | 151  | 7           | 346  | 88          | 134  | 6             | 138  | 3  |  |
| Zircon_079       | 259      | 135.9 | 0.52        | 0.0605  | 0.00       |         |            |         |             |         |         |                     |      |            |      |             |      |             |      |               |      |    |  |

|            |       |       |      |         |         |         |         |         |         |         |         |       |     |   |     |   |     |     |     |   |     |   |
|------------|-------|-------|------|---------|---------|---------|---------|---------|---------|---------|---------|-------|-----|---|-----|---|-----|-----|-----|---|-----|---|
| Zircon_084 | 182   | 55.6  | 0.31 | 0.0677  | 0.0029  | 0.188   | 0.0075  | 0.02065 | 0.00028 | 0.0061  | 0.00029 | -0.06 | 132 | 2 | 175 | 6 | 859 | 82  | 123 | 6 | 132 | 2 |
| Zircon_085 | 352.2 | 119.1 | 0.34 | 0.0669  | 0.00265 | 0.198   | 0.0075  | 0.0206  | 0.0003  | 0.00665 | 0.00032 | 0.07  | 131 | 2 | 183 | 6 | 835 | 76  | 134 | 6 | 131 | 2 |
| Zircon_086 | 350   | 91.8  | 0.26 | 0.0558  | 0.00315 | 0.159   | 0.0095  | 0.0204  | 0.0003  | 0.00688 | 0.00044 | 0.34  | 130 | 2 | 150 | 8 | 444 | 115 | 139 | 9 | 130 | 2 |
| Zircon_088 | 326   | 146.6 | 0.45 | 0.0575  | 0.00205 | 0.162   | 0.006   | 0.02009 | 0.00026 | 0.00614 | 0.00023 | 0.28  | 128 | 2 | 152 | 5 | 511 | 72  | 124 | 5 | 128 | 2 |
| Zircon_089 | 128   | 49.9  | 0.39 | 0.06805 | 0.00358 | 0.20119 | 0.01098 | 0.02144 | 0.00036 | 0.00653 | 0.00012 | -0.05 | 137 | 2 | 186 | 9 | 870 | 100 | 131 | 2 | 137 | 2 |
| Zircon_090 | 260   | 108.1 | 0.42 | 0.05067 | 0.00257 | 0.14404 | 0.00816 | 0.02062 | 0.00031 | 0.0065  | 0.00011 | 0.22  | 132 | 2 | 137 | 7 | 226 | 107 | 131 | 2 | 132 | 2 |
| Zircon_091 | 378   | 198.6 | 0.53 | 0.06627 | 0.00332 | 0.18587 | 0.01078 | 0.02034 | 0.00035 | 0.00621 | 0.0001  | 0.33  | 130 | 2 | 173 | 9 | 815 | 96  | 125 | 2 | 130 | 2 |
| Zircon_092 | 1837  | 604   | 0.33 | 0.0483  | 0.0013  | 0.1277  | 0.0035  | 0.0189  | 0.00024 | 0.00592 | 0.00022 | 0.27  | 121 | 2 | 122 | 3 | 114 | 57  | 119 | 4 | 121 | 2 |
| Zircon_093 | 731   | 390   | 0.53 | 0.0514  | 0.00135 | 0.1478  | 0.00365 | 0.02049 | 0.00026 | 0.00616 | 0.00021 | 0.13  | 131 | 2 | 140 | 3 | 259 | 55  | 124 | 4 | 131 | 2 |
| Zircon_094 | 184.1 | 62    | 0.34 | 0.0617  | 0.00285 | 0.182   | 0.008   | 0.02119 | 0.0003  | 0.00692 | 0.00029 |       | 135 | 2 | 170 | 7 | 664 | 91  | 139 | 6 | 135 | 2 |
| Zircon_095 | 843   | 519.2 | 0.62 | 0.0523  | 0.0014  | 0.1549  | 0.0042  | 0.02097 | 0.00027 | 0.00643 | 0.00024 | 0.26  | 134 | 2 | 146 | 4 | 299 | 56  | 130 | 5 | 134 | 2 |
| Zircon_096 | 481   | 276   | 0.57 | 0.0521  | 0.0017  | 0.151   | 0.0055  | 0.02088 | 0.0003  | 0.00666 | 0.00023 | 0.45  | 133 | 2 | 143 | 5 | 290 | 68  | 134 | 5 | 133 | 2 |
| Zircon_097 | 2542  | 855   | 0.34 | 0.0497  | 0.0015  | 0.1448  | 0.0045  | 0.02085 | 0.00025 | 0.00681 | 0.00027 | 0.27  | 133 | 2 | 137 | 4 | 181 | 64  | 137 | 5 | 133 | 2 |
| Zircon_098 | 172   | 81.7  | 0.48 | 0.0698  | 0.0027  | 0.204   | 0.007   | 0.02079 | 0.00034 | 0.00658 | 0.00028 | -0.05 | 133 | 2 | 189 | 6 | 922 | 73  | 133 | 6 | 133 | 2 |
| Zircon_099 | 194   | 80.2  | 0.41 | 0.04815 | 0.00231 | 0.13032 | 0.00671 | 0.01963 | 0.0003  | 0.00623 | 0.00018 | -0.01 | 125 | 2 | 124 | 6 | 107 | 97  | 125 | 4 | 125 | 2 |

Las Trancas Formation T13-03

| % disc | <sup>238</sup> U/ <sup>206</sup> Pb<br>b | 1s    | <sup>207</sup> Pb/ <sup>206</sup> Pb | 1s      | rTW       |
|--------|------------------------------------------|-------|--------------------------------------|---------|-----------|
| 26.5   | 50.945                                   | 0.684 | 0.0674                               | 0.0028  | -0.000058 |
| -0.1   | 6.05                                     | 0.077 | 0.0727                               | 0.00175 | 0.000021  |
| 8.0    | 8.795                                    | 0.356 | 0.0707                               | 0.0033  | 0.000227  |
| 12.5   | 47.824                                   | 0.618 | 0.0569                               | 0.0019  | -0.000009 |
| 2.9    | 48.077                                   | 0.901 | 0.0521                               | 0.00185 | -0.000089 |
| 10.1   | 47.962                                   | 0.621 | 0.0559                               | 0.0047  | 0.000406  |
| 2.6    | 4.907                                    | 0.065 | 0.0836                               | 0.002   | -0.00009  |
| 21.3   | 50.854                                   | 0.751 | 0.06309                              | 0.00411 | -0.000253 |
| 21.9   | 48.231                                   | 0.583 | 0.06336                              | 0.00204 | -0.00003  |
| 0.3    | 4.941                                    | 0.07  | 0.0809                               | 0.0019  | -0.000029 |
| 5.3    | 25.126                                   | 0.41  | 0.0555                               | 0.00145 | 0.000014  |
| 24.8   | 51.52                                    | 0.664 | 0.0675                               | 0.00215 | 0.000023  |
| -4.5   | 4.902                                    | 0.372 | 0.0755                               | 0.0021  | -0.000743 |
| 9.0    | 48.709                                   | 0.712 | 0.0553                               | 0.0016  | -0.000019 |
| 19.9   | 48.146                                   | 0.811 | 0.0628                               | 0.00335 | -0.000013 |
| 29.5   | 46.838                                   | 0.68  | 0.0715                               | 0.0022  | 0.000013  |
| 27.0   | 46.147                                   | 0.703 | 0.0703                               | 0.00325 | -0.000014 |
| 27.7   | 46.926                                   | 0.661 | 0.0697                               | 0.00275 | -0.000008 |
| 10.1   | 47.939                                   | 0.643 | 0.0555                               | 0.00155 | 0.000006  |
| 29.2   | 48.692                                   | 0.744 | 0.07072                              | 0.00305 | -0.000135 |
| 12.8   | 47.051                                   | 0.729 | 0.05681                              | 0.00249 | -0.000109 |
| 28.0   | 46.904                                   | 0.682 | 0.0709                               | 0.00295 | -0.000008 |
| 5.7    | 48.52                                    | 0.636 | 0.0518                               | 0.0015  | 0.000007  |
| 17.0   | 48.17                                    | 0.616 | 0.05927                              | 0.0022  | -0.000083 |
| 16.8   | 49.652                                   | 0.666 | 0.0618                               | 0.00185 | 0.000002  |
| 27.1   | 48.193                                   | 0.65  | 0.0698                               | 0.0023  | -0.000008 |
| 19.9   | 46.685                                   | 0.61  | 0.0624                               | 0.0024  | -0.000003 |
| 20.5   | 46.937                                   | 0.72  | 0.06229                              | 0.00307 | -0.000098 |
| 0.7    | 6.609                                    | 0.079 | 0.0707                               | 0.00155 | 0.000011  |
| 26.9   | 48.094                                   | 0.667 | 0.06843                              | 0.00274 | -0.000043 |
| 19.1   | 45.47                                    | 0.717 | 0.06144                              | 0.0025  | -0.000067 |
| 22.0   | 47.148                                   | 0.645 | 0.0639                               | 0.00195 | 0.000005  |
| 10.7   | 47.986                                   | 0.752 | 0.05486                              | 0.00341 | -0.000176 |
| 27.8   | 45.69                                    | 0.67  | 0.06963                              | 0.00284 | -0.000077 |
| 1.5    | 47.985                                   | 0.668 | 0.0486                               | 0.0014  | -0.00001  |
| 21.2   | 49.044                                   | 0.746 | 0.0685                               | 0.0034  | -0.000084 |
| 29.1   | 50.106                                   | 1.793 | 0.07027                              | 0.01198 | -0.001138 |
| 9.0    | 48.263                                   | 0.652 | 0.0505                               | 0.00215 | 0.000024  |
| 3.9    | 5.797                                    | 0.072 | 0.0778                               | 0.00195 | 0.000005  |
| 1.8    | 5.794                                    | 0.101 | 0.0748                               | 0.00215 | -0.000194 |
| 27.4   | 49.261                                   | 1.335 | 0.067                                | 0.0065  | -0.000657 |
| 14.0   | 9.05                                     | 0.192 | 0.0764                               | 0.00215 | -0.000028 |
| 16.9   | 48.077                                   | 0.647 | 0.0589                               | 0.00205 | 0.000016  |
| 22.9   | 47.237                                   | 0.669 | 0.064                                | 0.0022  | -0.000006 |
| 8.3    | 47.893                                   | 0.642 | 0.0522                               | 0.0019  | -0.000001 |
| 1.5    | 48.473                                   | 0.587 | 0.0491                               | 0.00115 | -0.000001 |
| 24.4   | 47.985                                   | 0.668 | 0.0634                               | 0.0022  | -0.000002 |
| 28.4   | 45.78                                    | 0.738 | 0.07005                              | 0.00336 | -0.000083 |
| 9.7    | 49.091                                   | 0.665 | 0.05445                              | 0.00205 | -0.000061 |
| 5.7    | 48.52                                    | 0.636 | 0.0514                               | 0.00135 | 0.000003  |
| 26.6   | 47.259                                   | 0.737 | 0.0666                               | 0.0036  | -0.000089 |
| 15.4   | 48.52                                    | 0.659 | 0.0574                               | 0.00185 | 0.000011  |
| 15.0   | 11.338                                   | 0.354 | 0.0713                               | 0.00195 | -0.000027 |
| 13.5   | 47.304                                   | 0.582 | 0.0563                               | 0.00175 | 0.000004  |
| 8.6    | 46.275                                   | 0.878 | 0.0534                               | 0.00225 | -0.000037 |
| 19.5   | 45.558                                   | 0.685 | 0.0605                               | 0.00205 | 0.00001   |
| 17.3   | 51.387                                   | 0.687 | 0.0577                               | 0.00195 | 0.000013  |
| 26.8   | 45.956                                   | 0.591 | 0.0655                               | 0.0024  | -0.000005 |



|      |        |       |         |         |           |
|------|--------|-------|---------|---------|-----------|
| 24.6 | 48.426 | 0.657 | 0.0677  | 0.0029  | 0.000028  |
| 28.4 | 48.544 | 0.707 | 0.0669  | 0.00265 | 0.00001   |
| 13.3 | 49.02  | 0.721 | 0.0558  | 0.00315 | -0.000078 |
| 15.8 | 49.776 | 0.644 | 0.0575  | 0.00205 | -0.000019 |
| 26.3 | 46.639 | 0.786 | 0.06805 | 0.00358 | -0.000044 |
| 3.6  | 48.503 | 0.726 | 0.05067 | 0.00257 | -0.000095 |
| 24.9 | 49.159 | 0.834 | 0.06627 | 0.00332 | -0.00013  |
| 0.8  | 52.91  | 0.672 | 0.0483  | 0.0013  | -0.000003 |
| 6.4  | 48.804 | 0.619 | 0.0514  | 0.00135 | 0.000007  |
| 20.6 | 47.192 | 0.668 | 0.0617  | 0.00285 | 0.000019  |
| 8.2  | 47.687 | 0.614 | 0.0523  | 0.0014  | -0.000002 |
| 7.0  | 47.893 | 0.688 | 0.0521  | 0.0017  | -0.000029 |
| 2.9  | 47.962 | 0.575 | 0.0497  | 0.0015  | -0.00001  |
| 29.6 | 48.1   | 0.787 | 0.0698  | 0.0027  | 0.000029  |
| -0.8 | 50.944 | 0.777 | 0.04815 | 0.00231 | -0.000045 |
