# Supplementary material
Source: publisher figshare collection journal article supplement (https://gsapubs.figshare.com/articles/dataset/_/16942972)
Supplement: Supplementary file 2 [file 1]

This Supplemental Material accompanies Ortega-Flores, B., Solari, L.A., Martini, M., and Ortega-Obregón, C., 2020, The Guerrero terrane, a para-autochthonous block on the paleo-Pacific continental margin of North America: Evidence from zircon U-Pb dating and Hf isotopes, in Martens, U.C., and Molina Garza, R.S., eds., Southern and Central Mexico: Basement Framework, Tectonic Evolution, and Provenance of Mesozoic–Cenozoic Basins: Geological Society of America Special Paper 546, p. 1–XXX, [https://doi.org/10.1130/2020.2546\(08\)](https://doi.org/10.1130/2020.2546(08)).

## S2: Results of Hf isotope analysis

|                         | 176Hf/177Hf<br>fstnorm | 176Hf/177Hfc<br>orr 2SE | 176Lu/177Hfc<br>orr | 176Lu/177Hfc<br>r 2SE | 176Yb/177Hfc<br>orr | 176Yb/177Hfc<br>r 2SE | 178Hf/177Hf<br>2SE | 176Hf/177Hf | t (age,<br>Ma) | εHf(0) | ±2 sigma     | εHf(t)      | TDM          | TDM C*     | TotalHfBe<br>am (V) |       |
|-------------------------|------------------------|-------------------------|---------------------|-----------------------|---------------------|-----------------------|--------------------|-------------|----------------|--------|--------------|-------------|--------------|------------|---------------------|-------|
| T11-04                  |                        |                         |                     |                       |                     |                       |                    |             |                |        |              |             |              |            |                     |       |
| San Juan de la Rosa Fm. |                        |                         |                     |                       |                     |                       |                    |             |                |        |              |             |              |            |                     |       |
| Sequence 5              | 0.282709               | 0.000019                | 0.000089            | 0.000016              | 0.02284             | 0.00055               | 1.467249           | 0.000034    | 0.282704135    | 292    | -2.687554149 | 0.671888537 | 3.637990934  | 766.99524  | 1051.39069          | 17.85 |
| Sequence 6              | 0.282831               | 0.000026                | 0.0014176           | 0.0000059             | 0.03909             | 0.00024               | 1.467279           | 0.000036    | 0.282827184    | 144    | 1.626677511  | 0.919426419 | 4.691924592  | 603.42866  | 868.3050186         | 15.61 |
| Sequence 7              | 0.282834               | 0.000021                | 0.0010219           | 0.0000068             | 0.02843             | 0.00026               | 1.46728            | 0.000034    | 0.282831345    | 139    | 1.732765175  | 0.742613646 | 4.727813704  | 592.82455  | 862.095552          | 15.74 |
| Sequence 8              | 0.282739               | 0.000062                | 0.00275             | 0.000056              | 0.0797              | 0.0012                | 1.467292           | 0.00008     | 0.282729228    | 190    | -1.626677511 | 2.192478385 | 2.251017913  | 762.29476  | 1059.472684         | 14.87 |
| Sequence 9              | 0.282614               | 0.000029                | 0.001934            | 0.00002               | 0.0555              | 0.00051               | 1.467282           | 0.000034    | 0.282607164    | 189    | -6.046996835 | 1.025514083 | -2.089567979 | 926.11446  | 1333.330454         | 17.15 |
| Sequence 10             | 0.282535               | 0.000021                | 0.000866            | 0.000027              | 0.02429             | 0.00092               | 1.467303           | 0.000062    | 0.282531971    | 187    | -8.840638648 | 0.742613646 | -4.794197692 | 1010.7245  | 1502.200177         | 16.5  |
| Sequence 11             | 0.282808               | 0.000042                | 0.00168             | 0.000062              | 0.0417              | 0.0012                | 1.467344           | 0.000047    | 0.282803603    | 140    | 0.813338756  | 1.485227293 | 3.768756154  | 640.8767   | 923.9130341         | 10.9  |
| Sequence 12             | 0.282897               | 0.000028                | 0.002026            | 0.000042              | 0.0563              | 0.0014                | 1.467306           | 0.000047    | 0.282891811    | 137    | 3.960606114  | 0.990151529 | 6.822205526  | 517.29757  | 726.9936514         | 15.14 |
| Sequence 13             | 0.282625               | 0.000024                | 0.0010291           | 0.0000024             | 0.030542            | 0.000093              | 1.467215           | 0.00004     | 0.282621208    | 197    | -5.658008735 | 0.84870131  | -1.41455506  | 888.37346  | 1296.941016         | 15.44 |
| Sequence 14             | 0.282641               | 0.000023                | 0.000455            | 0.0000029             | 0.01279             | 0.00015               | 1.467271           | 0.000041    | 0.282638598    | 282    | -5.092207861 | 0.813338756 | 1.095746295  | 852.81806  | 1204.586238         | 14.21 |
| Sequence 15             | 0.282205               | 0.000023                | 0.0006607           | 0.0000089             | 0.02007             | 0.00026               | 1.4673             | 0.000042    | 0.282192675    | 990    | -20.51028166 | 0.813338756 | 1.222305703  | 1462.9638  | 1750.741199         | 15.01 |
| Sequence 16             | 0.282938               | 0.000045                | 0.001736            | 0.000039              | 0.04501             | 0.00082               | 1.467399           | 0.000048    | 0.282933392    | 142    | 5.410470852  | 1.591314957 | 8.404369636  | 453.86751  | 629.8426854         | 13    |
| Sequence 17             | 0.282544               | 0.000076                | 0.002475            | 0.000072              | 0.0684              | 0.002                 | 1.46744            | 0.0001      | 0.282527123    | 364    | -8.522375656 | 2.687554149 | -1.017776226 | 1042.3912  | 1402.004737         | 17.19 |
| Sequence 18             | 0.282546               | 0.000026                | 0.000893            | 0.000024              | 0.02436             | 0.00059               | 1.467272           | 0.00004     | 0.282541252    | 284    | -8.451650547 | 0.919426419 | -2.304185471 | 996.02839  | 1420.755142         | 12.57 |
| Sequence 23             | 0.282539               | 0.000048                | 0.001581            | 0.000038              | 0.0438              | 0.001                 | 1.46744            | 0.0001      | 0.282533619    | 182    | -8.699188429 | 1.69740262  | -4.847206855 | 1024.4562  | 1501.66072          | 15.6  |
| Sequence 24             | 0.282857               | 0.000027                | 0.0014313           | 0.000009              | 0.03953             | 0.00041               | 1.467264           | 0.000049    | 0.282853254    | 140    | 2.546103931  | 0.954788974 | 5.52508507   | 566.3903   | 812.0906129         | 14.12 |
| Sequence 25             | 0.282425               | 0.000027                | 0.0018              | 0.00012               | 0.0507              | 0.00033               | 1.467253           | 0.000039    | 0.282395251    | 878    | -12.73051965 | 0.954788974 | 5.86648919   | 1193.9309  | 1371.329661         | 18.47 |
| Sequence 26             | 0.282208               | 0.000019                | 0.000799            | 0.000031              | 0.02291             | 0.00071               | 1.467268           | 0.000031    | 0.282190888    | 1135   | -20.404194   | 0.671888537 | 4.448778378  | 1464.1136  | 1662.864535         | 15.74 |
| Sequence 27             | 0.282288               | 0.00003                 | 0.001121            | 0.000067              | 0.0328              | 0.0019                | 1.467372           | 0.000039    | 0.282269409    | 881    | -17.57518963 | 1.060876638 | 1.475442147  | 1364.6531  | 1649.467368         | 13.8  |
| Sequence 28             | 0.282619               | 0.00006                 | 0.00264             | 0.00012               | 0.0743              | 0.0029                | 1.467463           | 0.000085    | 0.282609668    | 189    | -5.870184062 | 2.121753275 | -2.000969254 | 936.87954  | 1327.738638         | 10    |
| Sequence 29             | 0.282797               | 0.000037                | 0.002532            | 0.000029              | 0.0736              | 0.0012                | 1.467273           | 0.00004     | 0.282790468    | 138    | 0.424350655  | 1.30841452  | 3.259611344  | 672.23103  | 954.7191878         | 13.71 |
| Sequence 30             | 0.282339               | 0.000032                | 0.00112             | 0.000098              | 0.0315              | 0.0025                | 1.467329           | 0.000058    | 0.282317616    | 1013   | -15.77169935 | 1.131601747 | 6.171700551  | 1293.1385  | 1458.616465         | 14.44 |
| Sequence 35             | 0.28223                | 0.000026                | 0.0005364           | 0.000052              | 0.01568             | 0.00011               | 1.467374           | 0.000038    | 0.282219697    | 1019   | -19.6262178  | 0.919426419 | 2.837166437  | 1423.7997  | 1672.486027         | 13.31 |
| Sequence 36             | 0.282826               | 0.000024                | 0.000996            | 0.000013              | 0.02723             | 0.00032               | 1.467296           | 0.000042    | 0.282823356    | 142    | 1.449864738  | 0.84870131  | 4.512003631  | 603.74497  | 878.1895583         | 15.47 |
| Sequence 37             | 0.282134               | 0.000023                | 0.000628            | 0.000016              | 0.0187              | 0.00037               | 1.467363           | 0.000043    | 0.282122738    | 952    | -23.02102304 | 0.813338756 | -2.116427501 | 1559.5947  | 1929.383942         | 16.7  |
| Sequence 38             | 0.28216                | 0.000025                | 0.00032             | 0.000012              | 0.00954             | 0.00031               | 1.467303           | 0.000046    | 0.282153354    | 1101   | -22.10159662 | 0.884063865 | 2.345803633  | 1511.6196  | 1767.624283         | 13.19 |
| Sequence 39             | 0.282535               | 0.000023                | 0.001234            | 0.000065              | 0.0347              | 0.0017                | 1.467329           | 0.000044    | 0.282527999    | 303    | -8.840638648 | 0.813338756 | -2.349174478 | 1020.6375  | 1438.368065         | 16.2  |
| Sequence 40             | 0.28281                | 0.000026                | 0.001405            | 0.000019              | 0.03961             | 0.0005                | 1.467302           | 0.000037    | 0.282806165    | 146    | 0.884063865  | 0.919426419 | 3.992931371  | 633.27945  | 914.3578142         | 14.28 |
| Sequence 41             | 0.282547               | 0.000026                | 0.001397            | 0.000042              | 0.0387              | 0.0012                | 1.467246           | 0.00004     | 0.282538655    | 319    | -8.416287993 | 0.919426419 | -1.614929104 | 1008.0473  | 1404.570657         | 13.18 |
| Sequence 42             | 0.282852               | 0.000022                | 0.001676            | 0.000018              | 0.04672             | 0.0005                | 1.467235           | 0.000037    | 0.282847767    | 135.1  | 2.369291158  | 0.777976201 | 5.221931735  | 577.35905  | 827.5600318         | 15.33 |
| Sequence 47             | 0.282821               | 0.000028                | 0.001574            | 0.00003               | 0.03954             | 0.00034               | 1.467296           | 0.000045    | 0.28281688     | 140    | 1.273051965  | 0.990151529 | 4.238425882  | 620.356    | 894.0328356         | 13.45 |
| Sequence 48             | 0.282995               | 0.000033                | 0.001873            | 0.000064              | 0.0482              | 0.0022                | 1.467378           | 0.00005     | 0.282989817    | 148    | 7.426136464  | 1.166964302 | 10.53400792  | 372.62356  | 498.2223107         | 14.1  |
| Sequence 49             | 0.282174               | 0.000019                | 0.0005251           | 0.0000051             | 0.0158              | 0.00013               | 1.467253           | 0.000035    | 0.282164464    | 964    | -21.60652086 | 0.671888537 | -0.36618311  | 1500.4422  | 1829.607761         | 15.79 |
| Sequence 50             | 0.282789               | 0.000027                | 0.001082            | 0.00005               | 0.028               | 0.0012                | 1.467278           | 0.00004     | 0.282786087    | 144    | 0.141450218  | 0.954788974 | 3.238181221  | 657.61161  | 960.781134          | 14.42 |
| Sequence 51             | 0.282325               | 0.000027                | 0.001368            | 0.00006               | 0.0409              | 0.0016                | 1.467284           | 0.000045    | 0.282314025    | 428    | -16.26677511 | 0.954788974 | -7.129169227 | 1321.4535  | 1835.15897          | 14.07 |
| Sequence 52             | 0.282653               | 0.000022                | 0.000558            | 0.000011              | 0.01524             | 0.00035               | 1.467254           | 0.000031    | 0.282651038    | 188    | -4.667857206 | 0.777976201 | -0.559673947 | 838.40237  | 1235.911305         | 14.83 |
| Sequence 53             | 0.282837               | 0.000033                | 0.001709            | 0.000027              | 0.04546             | 0.00097               | 1.467273           | 0.000041    | 0.282832495    | 141    | 1.838852839  | 1.166964302 | 4.813032032  | 599.53332  | 858.2389173         | 13.17 |
| Sequence 54             | 0.282902               | 0.00003                 | 0.001765            | 0.000036              | 0.04442             | 0.00087               | 1.467347           | 0.000039    | 0.282897414    | 139    | 4.137418887  | 1.060876638 | 7.064905824  | 506.38886  | 713.0730594         | 12.31 |
| Sequence 55             | 0.282869               | 0.000028                | 0.002019            | 0.000052              | 0.0548              | 0.0016                | 1.467275           | 0.000033    | 0.282863754    | 139    | 2.970454586  | 0.990151529 | 5.874233943  | 558.00978  | 789.0469457         | 14.63 |
| Sequence 56             | 0.282251               | 0.000027                | 0.000825            | 0.000062              | 0.022               | 0.0017                | 1.467241           | 0.000036    | 0.2822344      | 1067   | -18.88360415 | 0.954788974 | 4.446998814  | 1405.4386  | 1609.419044         | 11.46 |
| Sequence 57             | 0.282822               | 0.000031                | 0.001487            | 0.000038              | 0.0407              | 0.0012                | 1.467278           | 0.000042    | 0.282818053    | 142    | 1.30841452   | 1.096239192 | 4.324401385  | 617.46793  | 890.1302148         | 14.34 |
| Sequence 58             | 0.28285                | 0.000025                | 0.001294            | 0.000019              | 0.03315             | 0.00045               | 1.467251           | 0.00004     | 0.282846541    | 143    | 2.298566048  | 0.884063865 | 5.354393522  | 574.30308  | 825.3251893         | 14.86 |
| Sequence 59             | 0.2828                 | 0.000031                | 0.001859            | 0.000025              | 0.05011             | 0.00066               | 1.467336           | 0.000047    | 0.282795169    | 139    | 0.530438319  | 1.096239192 | 6.55.58232   | 943.515455 | 13.97               | 13.97 |
| Sequence 60             | 0.28267                | 0.000036                | 0.00196             | 0.00014               | 0.061               | 0.005                 | 1.467309           | 0.000035    | 0.282663769    | 170    | -4.066693778 | 1.273051965 | -0.510059527 | 845.80797  | 1218.744809         | 16.56 |
| Sequence 61             | 0.28281                | 0.000032                | 0.001766            | 0.000012              | 0.04737             | 0.00027               | 1.467256           | 0.000043    | 0.282805576    | 134    | 0.884063865  | 1.131601747 | 3.70502516   | 639.48283  | 923.263619          | 13.98 |
| Sequence 62             | 0.28243                | 0.000022                | 0.001373            | 0.000011              | 0.03722             | 0.00022               | 1.467283           | 0.000036    | 0.282424864    | 200    | -12.55370688 | 0.777976201 | -8.294064018 | 1173.2373  | 1731.960058         | 18.46 |
| Sequence 63             | 0.282196               | 0.000029                | 0.000986            | 0.00008               |                     |                       |                    |             |                |        |              |             |              |            |                     |       |

|             | 176Hf/177Hf<br>fstnorm | 176Hf/177Hf<br>corr 2SE | 176Lu/177Hf<br>corr | 176Lu/177Hf<br>corr 2SE | 176Yb/177Hf<br>corr | 176Yb/177Hf<br>corr 2SE | 178Hf/177Hf | 178Hf/177Hf<br>2SE | 176Hf/177Hf | t (age,<br>Ma) | εHf(0)       | ±2 sigma    | εHf(t)       | TDM       | TDM C*      | TotalHfBe<br>am (V) |
|-------------|------------------------|-------------------------|---------------------|-------------------------|---------------------|-------------------------|-------------|--------------------|-------------|----------------|--------------|-------------|--------------|-----------|-------------|---------------------|
| Sequence 79 | 0.282559               | 0.000035                | 0.001854            | 0.000023                | 0.05466             | 0.0007                  | 1.467323    | 0.00005            | 0.282552585 | 185            | -7.991937338 | 1.237689411 | -4.109450558 | 1003.2753 | 1457.552567 | 15.71               |
| Sequence 80 | 0.282807               | 0.000038                | 0.001693            | 0.000024                | 0.04495             | 0.00041                 | 1.467374    | 0.000062           | 0.282802569 | 140            | 0.777976201  | 1.343777074 | 3.732179054  | 642.54411 | 926.2393549 | 10.7                |
| Sequence 81 | 0.282622               | 0.000038                | 0.001888            | 0.000038                | 0.0543              | 0.00097                 | 1.467365    | 0.000059           | 0.282615574 | 182            | -5.764096398 | 1.343777074 | -1.947894088 | 913.42165 | 1318.943173 | 11.53               |
| Sequence 82 | 0.28261                | 0.000028                | 0.0013766           | 0.0000047               | 0.03841             | 0.00022                 | 1.46728     | 0.000046           | 0.282605237 | 185            | -6.188447053 | 0.990151529 | -2.24678384  | 917.97833 | 1340.141119 | 16                  |
| Sequence 83 | 0.282532               | 0.000033                | 0.001813            | 0.000058                | 0.0526              | 0.0014                  | 1.467351    | 0.000066           | 0.282526101 | 174            | -8.946726312 | 1.166964302 | -5.291204482 | 1040.9416 | 1523.391984 | 15.3                |
| Sequence 84 | 0.282252               | 0.000034                | 0.001646            | 0.000077                | 0.0439              | 0.0018                  | 1.467313    | 0.000077           | 0.282246182 | 189            | -18.8482416  | 1.202326856 | -14.86017596 | 1434.9968 | 2133.288355 | 14.5                |

#### T11-05

##### Peña Azul Fm.

|             |          |          |           |           |         |         |          |          |             |       |               |             |              |            |             |       |
|-------------|----------|----------|-----------|-----------|---------|---------|----------|----------|-------------|-------|---------------|-------------|--------------|------------|-------------|-------|
| Sequence 6  | 0.282614 | 0.000025 | 0.001617  | 0.000012  | 0.04834 | 0.00041 | 1.467246 | 0.000031 | 0.282608708 | 175   | -6.046996835  | 0.884063865 | -2.346604389 | 918.20112  | 1338.66499  | 22.82 |
| Sequence 7  | 0.282593 | 0.00003  | 0.001075  | 0.000044  | 0.0321  | 0.0012  | 1.467378 | 0.000084 | 0.282590166 | 141   | -6.789610481  | 1.060876638 | -3.759018672 | 934.60203  | 1401.342125 | 20.5  |
| Sequence 8  | 0.282636 | 0.000032 | 0.001936  | 0.000019  | 0.05931 | 0.00061 | 1.467349 | 0.000051 | 0.282631016 | 137.7 | -5.269020634  | 1.131601747 | -2.38740532  | 894.39364  | 1312.244352 | 23.8  |
| Sequence 9  | 0.282177 | 0.00003  | 0.0006441 | 0.0000041 | 0.01969 | 0.00022 | 1.467312 | 0.000039 | 0.28216458  | 1023  | -21.50043319  | 1.060876638 | 0.974265643  | 1500.9673  | 1792.103128 | 12.85 |
| Sequence 10 | 0.282156 | 0.000022 | 0.0007134 | 0.000008  | 0.02023 | 0.00015 | 1.467293 | 0.000033 | 0.282141972 | 1043  | -22.24304684  | 0.777976201 | 0.626331134  | 1532.701   | 1829.495912 | 19    |
| Sequence 11 | 0.282597 | 0.000016 | 0.0011754 | 0.000005  | 0.03611 | 0.00021 | 1.467273 | 0.000033 | 0.282594056 | 134   | -6.648160263  | 0.565800873 | -3.777110469 | 931.44485  | 1397.05177  | 21.75 |
| Sequence 12 | 0.282613 | 0.000019 | 0.00101   | 0.000014  | 0.03122 | 0.00058 | 1.467251 | 0.000029 | 0.282610413 | 137   | -6.08235939   | 0.671888537 | -3.131774168 | 904.681661 | 1358.681661 | 21.25 |
| Sequence 13 | 0.282615 | 0.000027 | 0.001005  | 0.00001   | 0.02974 | 0.0002  | 1.467273 | 0.000041 | 0.282612464 | 135   | -6.01163428   | 0.954788974 | -3.10372298  | 901.89161  | 1355.358868 | 13.19 |
| Sequence 14 | 0.282597 | 0.00003  | 0.00168   | 0.000054  | 0.0508  | 0.0014  | 1.46728  | 0.000035 | 0.282592697 | 137   | -6.648160263  | 1.060876638 | -3.758444799 | 944.13245  | 1398.202536 | 14.47 |
| Sequence 15 | 0.282601 | 0.000021 | 0.001082  | 0.000017  | 0.03341 | 0.00069 | 1.467247 | 0.000033 | 0.282598328 | 132.1 | -6.506710045  | 0.742613646 | -3.668231514 | 923.49102  | 1388.712972 | 21.38 |
| Sequence 16 | 0.282582 | 0.000022 | 0.001439  | 0.000028  | 0.04544 | 0.00079 | 1.467264 | 0.000038 | 0.282578557 | 128   | -7.178598582  | 0.777976201 | -4.458753656 | 959.38549  | 1435.357065 | 24.34 |
| Sequence 21 | 0.282199 | 0.000028 | 0.001213  | 0.000029  | 0.0362  | 0.0012  | 1.467424 | 0.000069 | 0.282173461 | 1116  | -20.72245699  | 0.990151529 | 3.399262895  | 1492.7985  | 1713.568978 | 15.2  |
| Sequence 22 | 0.282618 | 0.000027 | 0.001278  | 0.000042  | 0.0378  | 0.0014  | 1.46729  | 0.000036 | 0.282613698 | 180   | -5.905546617  | 0.954788974 | -2.058781472 | 904.21235  | 1324.387316 | 17.8  |
| Sequence 23 | 0.282589 | 0.000027 | 0.001024  | 0.000021  | 0.02954 | 0.00057 | 1.467265 | 0.000037 | 0.282586492 | 131   | -6.9310607    | 0.954788974 | -4.111353614 | 938.9707   | 1415.79305  | 14.7  |
| Sequence 24 | 0.282571 | 0.000023 | 0.001088  | 0.000015  | 0.02176 | 0.00033 | 1.467305 | 0.00005  | 0.282567081 | 238   | -7.567586682  | 0.813338756 | -2.41606325  | 960.64345  | 1392.029826 | 16.31 |
| Sequence 25 | 0.282631 | 0.000027 | 0.001304  | 0.000021  | 0.03951 | 0.00067 | 1.467308 | 0.000041 | 0.282627709 | 135   | -5.445833407  | 0.954788974 | -2.564443751 | 886.38169  | 1321.323693 | 13.15 |
| Sequence 26 | 0.282197 | 0.000034 | 0.001002  | 0.000031  | 0.0296  | 0.0013  | 1.467347 | 0.000049 | 0.282175445 | 1140  | -20.7931821   | 1.202326856 | 4.014909634  | 1487.2778  | 1693.949887 | 10.64 |
| Sequence 27 | 0.282608 | 0.000021 | 0.0006924 | 0.0000087 | 0.02016 | 0.00034 | 1.467259 | 0.000037 | 0.282606149 | 143   | -6.259172163  | 0.742613646 | -3.149172084 | 904.25452  | 1364.438244 | 14.01 |
| Sequence 28 | 0.282623 | 0.000015 | 0.0007365 | 0.0000042 | 0.02257 | 0.00017 | 1.467221 | 0.000034 | 0.28261128  | 136   | -5.728733844  | 0.530438319 | -2.775016621 | 884.32608  | 1335.392893 | 18.76 |
| Sequence 29 | 0.282602 | 0.000026 | 0.0006889 | 0.0000026 | 0.02099 | 0.00014 | 1.46726  | 0.000028 | 0.282600313 | 131   | -6.47134749   | 0.919426419 | -3.622480337 | 912.54992  | 1384.974556 | 16.11 |
| Sequence 30 | 0.282621 | 0.000028 | 0.001111  | 0.000011  | 0.03386 | 0.00049 | 1.467267 | 0.00004  | 0.282618238 | 133   | -5.799458953  | 0.990151529 | -2.943953463 | 895.9591   | 1343.724302 | 13.49 |
| Sequence 31 | 0.282598 | 0.000025 | 0.001391  | 0.000029  | 0.041   | 0.00078 | 1.467252 | 0.000032 | 0.282593552 | 171   | -6.612797709  | 0.884063865 | -2.971802693 | 935.40171  | 1374.997275 | 18    |
| Sequence 32 | 0.282781 | 0.000019 | 0.0004856 | 0.0000069 | 0.01244 | 0.00016 | 1.467311 | 0.000037 | 0.28277982  | 130   | -10.141450218 | 0.671888537 | 2.704940514  | 658.49423  | 983.7039699 | 18.4  |
| Sequence 33 | 0.282679 | 0.000031 | 0.00122   | 0.000018  | 0.03702 | 0.00077 | 1.467275 | 0.000038 | 0.282675898 | 136   | -3.748430787  | 1.096239192 | -0.83759683  | 816.33546  | 1212.971533 | 13.65 |
| Sequence 34 | 0.282665 | 0.000024 | 0.0011712 | 0.0000066 | 0.03513 | 0.00031 | 1.467269 | 0.000035 | 0.282662066 | 134   | -4.243506551  | 0.84870131  | -1.371368701 | 835.10766  | 1245.170632 | 16.79 |
| Sequence 39 | 0.282747 | 0.000025 | 0.000866  | 0.0000093 | 0.02296 | 0.00033 | 1.467301 | 0.000038 | 0.28274475  | 139   | -1.343777074  | 0.884063865 | 1.664651296  | 713.02525  | 1056.789496 | 15.69 |
| Sequence 40 | 0.282504 | 0.000019 | 0.000475  | 0.0000043 | 0.01336 | 0.0001  | 1.467274 | 0.000041 | 0.282501305 | 303   | -9.93687784   | 0.671888537 | -3.293784957 | 1043.3551  | 1497.818137 | 19.3  |
| Sequence 41 | 0.282494 | 0.00002  | 0.0007255 | 0.0000045 | 0.01876 | 0.00018 | 1.467308 | 0.000039 | 0.282490306 | 272   | -10.29050339  | 0.707251092 | -4.374546759 | 1064.1664  | 1541.709887 | 15.31 |
| Sequence 42 | 0.282591 | 0.000029 | 0.000202  | 0.000053  | 0.063   | 0.0015  | 1.467235 | 0.000039 | 0.282585927 | 134.2 | -6.860335591  | 1.025514083 | -4.060183626 | 961.60775  | 1415.04978  | 17.74 |
| Sequence 43 | 0.282607 | 0.000033 | 0.001293  | 0.000036  | 0.0395  | 0.0012  | 1.467336 | 0.000037 | 0.282603761 | 134   | -6.294534717  | 1.166964302 | -3.433799762 | 920.1845   | 1375.403941 | 14.08 |
| Sequence 48 | 0.282635 | 0.000034 | 0.001323  | 0.000057  | 0.04    | 0.0019  | 1.467298 | 0.000034 | 0.282631587 | 138   | -5.304383189  | 1.202326856 | -2.360550956 | 881.14832  | 1310.781865 | 12.74 |
| Sequence 49 | 0.282596 | 0.000024 | 0.00066   | 0.000015  | 0.02004 | 0.0005  | 1.467294 | 0.000037 | 0.282592442 | 288   | -6.683522818  | 0.84870131  | -0.403600567 | 920.22804  | 1304.01443  | 14.11 |
| Sequence 50 | 0.282667 | 0.000025 | 0.0009994 | 0.000007  | 0.03    | 0.00037 | 1.467337 | 0.000038 | 0.282664553 | 131   | -4.172781442  | 0.884063865 | -1.350140734 | 828.48101  | 1241.493404 | 15.5  |
| Sequence 51 | 0.282616 | 0.000032 | 0.0007205 | 0.0000033 | 0.01998 | 0.0001  | 1.467337 | 0.000044 | 0.282614263 | 129   | -5.976271726  | 1.131601747 | -3.173517052 | 893.74047  | 1355.103472 | 12.51 |
| Sequence 52 | 0.282661 | 0.000032 | 0.001054  | 0.000046  | 0.0305  | 0.0017  | 1.467273 | 0.000041 | 0.282658261 | 139   | -4.384956769  | 1.131601747 | -1.394748232 | 838.15522  | 1250.540431 | 13.85 |

#### T11-01

##### El Chilar Complex

|             |          |          |           |           |          |          |          |          |             |      |              |             |              |           |             |       |
|-------------|----------|----------|-----------|-----------|----------|----------|----------|----------|-------------|------|--------------|-------------|--------------|-----------|-------------|-------|
| Sequence 5  | 0.282143 | 0.000016 | 0.000576  | 0.000013  | 0.01747  | 0.00044  | 1.4673   | 0.000031 | 0.282130719 | 1130 | -22.70276005 | 0.565800873 | 2.202012999  | 1545.1005 | 1799.379257 | 7     |
| Sequence 6  | 0.282017 | 0.000025 | 0.000271  | 0.000003  | 0.00822  | 0.00012  | 1.467325 | 0.000039 | 0.282010994 | 1174 | -27.15844193 | 0.884063865 | -1.04278688  | 1704.6458 | 2035.981745 | 15.12 |
| Sequence 7  | 0.281864 | 0.000041 | 0.001346  | 0.000033  | 0.03701  | 0.00089  | 1.467265 | 0.000028 | 0.281848837 | 600  | -32.56891278 | 1.449864738 | -19.74669235 | 1966.9135 | 2748.688835 | 24.2  |
| Sequence 8  | 0.28213  | 0.00002  | 0.0004595 | 0.0000031 | 0.01413  | 0.00019  | 1.467283 | 0.000034 | 0.282121306 | 1004 | -23.16247326 | 0.707251092 | -0.990015425 | 1558.253  | 1899.792565 | 20.85 |
| Sequence 9  | 0.282238 | 0.000026 | 0.001441  | 0.000011  | 0.04326  | 0.00048  | 1.467291 | 0.000037 | 0.282204939 | 1215 | -19.34331736 | 0.919426419 | 6.766798008  | 1446.8945 | 1580.806488 | 15.95 |
| Sequence 10 | 0.282225 | 0.000017 | 0.0005594 | 0.000005  | 0.01658  | 0.00015  | 1.467283 | 0.000032 | 0.282214639 | 983  | -19.80303057 | 0.601163428 | 1.842192097  | 1431.5447 | 1706.48784  | 19.06 |
| Sequence 11 | 0.282109 | 0.000014 | 0.0000763 | 0.0000034 | 0.00318  | 0.00014  | 1.467298 | 0.000032 | 0.282107375 | 1129 | -23.9050869  | 0.495075764 | 1.351684391  | 1571.4032 | 1851.655959 | 26.2  |
| Sequence 12 | 0.282298 | 0.000024 | 0.001407  | 0.000057  | 0.0417   | 0.0016   | 1.467241 | 0.000035 | 0.282285705 | 466  | -17.22156409 | 0.84870131  | -7.281349898 | 1360.9554 | 1874.048081 | 22.39 |
| Sequence 13 | 0.282154 | 0.000017 | 0.0003422 | 0.000007  | 0.01013  | 0.00019  | 1.467274 | 0.000037 | 0.282150997 | 468  | -22.31377195 | 0.601163428 | -12.00518888 | 1520.6976 | 2169.723222 | 20.1  |
| Sequence 15 | 0.282119 | 0.000017 | 0.0004357 | 0.000022  | 0.013184 | 0.000043 | 1.467287 | 0.000031 | 0.282116692 | 283  | -23.55146136 | 0.601163428 | -17.34950086 | 1572.3627 | 2359.475681 | 22.56 |
| Sequence 16 | 0.282153 | 0.000018 | 0.000719  | 0.000013  | 0.02157  | 0.00041  | 1.467259 | 0.000035 | 0.282138862 | 1043 | -22.3491345  | 0.636525983 | 0.516091911  | 1537.0695 | 1836.375375 | 21.75 |
| Sequence 17 | 0.282264 | 0.000024 | 0.00138   | 0.000039  | 0.0447   | 0.0013   | 1.467248 | 0.000034 | 0.282232523 | 1208 | -18.42389094 | 0.84870131  | 7.585514958  | 1407.913  | 1523.929927 | 19.48 |
| Sequence 23 | 0.282118 | 0.000018 | 0.000653  | 0.0000043 | 0.01999  | 0.00012  | 1.467294 | 0.000032 | 0.282114749 | 266  | -23.58682391 | 0.636525983 | -17.79686655 | 1582.6597 | 2374.210506 | 20.7  |
| Sequence 24 | 0.282001 | 0.000018 | 0.0006561 | 0.0000092 | 0.01868  | 0.0003   | 1.467308 | 0.000037 | 0.281986536 | 1168 | -27.7242428  | 0.636525983 | -2.046373168 | 1743.7442 | 2093.632746 | 18.7  |
| Sequence 25 | 0.282084 | 0.000026 | 0.001825  | 0.000018  | 0.0584   | 0.00055  | 1.467313 | 0.00003  | 0.28204387  | 1165 | -24.78915077 | 0.919426419 | -0.081735624 | 1680.8832 | 1969.171579 | 23    |

|             | 176Hf/177Hf<br>fstnorm | 176Hf/177Hf<br>corr 2SE | 176Lu/177Hf<br>corr | 176Lu/177Hf<br>r 2SE | 176Yb/177Hf<br>corr | 176Yb/177Hf<br>r 2SE | 178Hf/177Hf<br>2SE | 176Hf/177Hf<br>t (age, Ma) | εHf(0)      | ±2 sigma | εHf(t)       | TDM         | TDM C*       | TotalHfBe<br>am (V) |             |       |
|-------------|------------------------|-------------------------|---------------------|----------------------|---------------------|----------------------|--------------------|----------------------------|-------------|----------|--------------|-------------|--------------|---------------------|-------------|-------|
| Sequence 27 | 0.282607               | 0.000019                | 0.000847            | 0.000012             | 0.0235              | 0.00034              | 1.467268           | 0.000026                   | 0.282602433 | 288      | -6.294534717 | 0.671888537 | -0.050038488 | 909.34813           | 1281.688952 | 18.98 |
| Sequence 28 | 0.282623               | 0.000018                | 0.001003            | 0.0000067            | 0.02834             | 0.00015              | 1.467292           | 0.000033                   | 0.282618119 | 260      | -5.728733844 | 0.636525983 | -0.119699834 | 890.5759            | 1264.244625 | 18.95 |
| Sequence 29 | 0.282481               | 0.000021                | 0.001145            | 0.000029             | 0.02814             | 0.00062              | 1.467296           | 0.000036                   | 0.2824753   | 266      | -10.7502166  | 0.742613646 | -5.039331652 | 1094.3425           | 1578.828396 | 19.83 |
| Sequence 30 | 0.282475               | 0.000019                | 0.001035            | 0.000032             | 0.02644             | 0.00083              | 1.467266           | 0.000031                   | 0.282469478 | 285      | -10.96239192 | 0.671888537 | -4.821609295 | 1099.5802           | 1579.879635 | 20.76 |
| Sequence 31 | 0.282837               | 0.000022                | 0.001373            | 0.000023             | 0.03503             | 0.0006               | 1.467243           | 0.000036                   | 0.282830036 | 271      | 1.838852839  | 0.777976201 | 7.624092213  | 594.12294           | 781.3994945 | 19.04 |
| Sequence 32 | 0.282163               | 0.000018                | 0.000654            | 0.0000059            | 0.01974             | 0.00017              | 1.467277           | 0.000031                   | 0.282159499 | 286      | -21.99550896 | 0.636525983 | -15.76795174 | 1520.669            | 2263.779641 | 18.5  |
| Sequence 33 | 0.282296               | 0.000022                | 0.0006093           | 0.0000012            | 0.019378            | 0.000033             | 1.467256           | 0.000033                   | 0.282281357 | 1272     | -17.29228919 | 0.777976201 | 10.77561735  | 1335.3472           | 1374.267693 | 18.9  |
| Sequence 35 | 0.282646               | 0.000018                | 0.000871            | 0.000011             | 0.02142             | 0.00028              | 1.467277           | 0.000032                   | 0.2826415   | 276      | -4.915395088 | 0.636525983 | 1.064542483  | 855.17309           | 1201.871367 | 18.6  |
| Sequence 36 | 0.282489               | 0.000024                | 0.001089            | 0.000018             | 0.03104             | 0.00055              | 1.467296           | 0.000043                   | 0.282483149 | 287      | -10.46731616 | 0.84870131  | -4.293247006 | 1081.463            | 1548.235834 | 14.14 |
| Sequence 37 | 0.282465               | 0.000021                | 0.000771            | 0.000019             | 0.02052             | 0.00052              | 1.467273           | 0.000037                   | 0.282461118 | 269      | -11.31601747 | 0.742613646 | -5.474233293 | 1105.889            | 1608.461567 | 17.32 |
| Sequence 42 | 0.282732               | 0.000021                | 0.0005045           | 0.000006             | 0.01396             | 0.00015              | 1.4673             | 0.000036                   | 0.282729375 | 278      | -1.874215393 | 0.742613646 | 4.218560336  | 727.1874            | 1003.565838 | 16.5  |
| Sequence 43 | 0.282121               | 0.000019                | 0.000522            | 0.000027             | 0.01513             | 0.00089              | 1.467318           | 0.000029                   | 0.282118205 | 286      | -23.48073625 | 0.671888537 | -17.22911729 | 1573.1467           | 2354.310538 | 17.2  |
| Sequence 45 | 0.282505               | 0.000019                | 0.001082            | 0.000028             | 0.02641             | 0.00056              | 1.467265           | 0.000033                   | 0.282499349 | 279      | -9.901515285 | 0.671888537 | -3.898456475 | 1058.7519           | 1517.210397 | 17.73 |
| Sequence 46 | 0.28281                | 0.000024                | 0.001319            | 0.000028             | 0.03256             | 0.00064              | 1.467322           | 0.000033                   | 0.282803508 | 263      | 0.884063865  | 0.84870131  | 6.506847703  | 631.81935           | 846.2819327 | 18.7  |
| Sequence 47 | 0.282939               | 0.000033                | 0.003155            | 0.000032             | 0.0889              | 0.0011               | 1.467311           | 0.000035                   | 0.282920983 | 305      | 5.445833407  | 1.166964302 | 11.60180468  | 470.554             | 554.1621984 | 15.54 |
| Sequence 48 | 0.282633               | 0.000017                | 0.0007311           | 0.0000088            | 0.017633            | 0.00069              | 1.46728            | 0.000034                   | 0.282628647 | 318      | -5.375108298 | 0.601163428 | 1.547325032  | 870.21221           | 1204.168173 | 19.7  |
| Sequence 49 | 0.282234               | 0.00002                 | 0.0003603           | 0.000004             | 0.0111              | 0.00014              | 1.467268           | 0.000036                   | 0.282232057 | 288      | -19.48476758 | 0.707251092 | -13.1558751  | 1411.8094           | 2103.091449 | 18.18 |
| Sequence 50 | 0.282545               | 0.000024                | 0.0014507           | 0.0000077            | 0.04089             | 0.0002               | 1.467275           | 0.000035                   | 0.282519013 | 951      | -8.487013102 | 0.84870131  | 11.90411061  | 1012.3436           | 1047.831275 | 20.42 |
| Sequence 51 | 0.282149               | 0.000023                | 0.000508            | 0.000013             | 0.01498             | 0.00044              | 1.467282           | 0.000034                   | 0.28214501  | 419      | -22.49058472 | 0.813338756 | -13.31281116 | 1534.1261           | 2213.278373 | 16.93 |
| Sequence 52 | 0.281789               | 0.00002                 | 0.000767            | 0.000032             | 0.02298             | 0.00087              | 1.467268           | 0.000037                   | 0.281773231 | 1090     | -35.22110437 | 0.707251092 | -11.37894985 | 2040.047            | 2609.775502 | 15.53 |
| Sequence 53 | 0.282166               | 0.000019                | 0.000972            | 0.000034             | 0.0299              | 0.0011               | 1.467275           | 0.000033                   | 0.282141599 | 1328     | -21.88942129 | 0.671888537 | 7.096610578  | 1529.2337           | 1649.509283 | 18.98 |
| Sequence 54 | 0.28233                | 0.000022                | 0.0012948           | 0.0000075            | 0.03877             | 0.00025              | 1.467282           | 0.000032                   | 0.282300169 | 1220     | -16.08996234 | 0.777976201 | 10.25749661  | 1311.8359           | 1365.550457 | 21.1  |
| Sequence 55 | 0.282191               | 0.000016                | 0.0000866           | 0.0000077            | 0.00316             | 0.0003               | 1.467291           | 0.000038                   | 0.28218931  | 1035     | -21.00535743 | 0.565800873 | 2.122851512  | 1460.3834           | 1729.738722 | 18.86 |
| Sequence 57 | 0.282642               | 0.00002                 | 0.0010941           | 0.0000097            | 0.02881             | 0.00027              | 1.467249           | 0.00003                    | 0.282636224 | 282      | -5.056845307 | 0.707251092 | 1.011753641  | 865.89761           | 1209.898461 | 19.28 |
| Sequence 62 | 0.282513               | 0.000019                | 0.00109             | 0.000027             | 0.02809             | 0.0008               | 1.467303           | 0.000028                   | 0.282507553 | 267      | -9.618614849 | 0.671888537 | -3.87579646  | 1047.7156           | 1506.471502 | 18.53 |
| Sequence 63 | 0.282062               | 0.000016                | 0.0008001           | 0.0000081            | 0.02361             | 0.0002               | 1.46731            | 0.000031                   | 0.282057897 | 274      | -25.56712697 | 0.565800873 | -19.63038564 | 1666.1463           | 2493.637712 | 21.9  |
| Sequence 64 | 0.282263               | 0.000018                | 0.0006615           | 0.0000069            | 0.01703             | 0.00029              | 1.467288           | 0.000037                   | 0.282250358 | 1014     | -18.4592535  | 0.636525983 | 3.810524293  | 1382.8337           | 1607.590244 | 17.85 |
| Sequence 65 | 0.282119               | 0.000014                | 0.0004876           | 0.0000056            | 0.01291             | 0.00022              | 1.467269           | 0.000029                   | 0.282108873 | 1101     | -23.55146136 | 0.495075764 | 0.768958407  | 1574.4838           | 1866.0437   | 21.09 |
| Sequence 66 | 0.282471               | 0.000021                | 0.000585            | 0.000015             | 0.0283              | 0.00045              | 1.46732            | 0.000034                   | 0.282469456 | 964      | -11.10384214 | 0.742613646 | 10.44245677  | 1078.0685           | 1150.64835  | 16    |
| Sequence 67 | 0.282279               | 0.000018                | 0.0005703           | 0.0000097            | 0.0176              | 0.00031              | 1.467268           | 0.000034                   | 0.282266024 | 1205     | -17.89345262 | 0.636525983 | 8.705126491  | 1357.4601           | 1451.259284 | 19.51 |
| Sequence 68 | 0.282197               | 0.000023                | 0.0005628           | 0.0000051            | 0.01614             | 0.00018              | 1.467304           | 0.000029                   | 0.282190904 | 577      | -20.7931821  | 0.813338756 | -8.150238715 | 1470.2488           | 2014.02081  | 18.77 |
| Sequence 69 | 0.282432               | 0.000023                | 0.001231            | 0.000041             | 0.02789             | 0.00087              | 1.467309           | 0.000026                   | 0.28240838  | 1018     | -12.48298177 | 0.813338756 | 9.50203547   | 1165.9837           | 1252.86938  | 18.06 |
| Sequence 70 | 0.282214               | 0.000022                | 0.000878            | 0.000014             | 0.02688             | 0.00044              | 1.467257           | 0.000031                   | 0.282193571 | 1232     | -20.19201867 | 0.777976201 | 6.750842779  | 1458.8202           | 1595.24388  | 17.56 |
| Sequence 71 | 0.282207               | 0.000015                | 0.000389            | 0.000014             | 0.01192             | 0.00034              | 1.467277           | 0.000034                   | 0.282205129 | 257      | -20.43955655 | 0.530438319 | -14.79935516 | 1449.9042           | 2181.503182 | 23.76 |
| Sequence 72 | 0.282178               | 0.000024                | 0.001039            | 0.000014             | 0.03084             | 0.00049              | 1.4673             | 0.000036                   | 0.282156303 | 1107     | -21.46507064 | 0.84870131  | 2.586578966  | 1515.2162           | 1757.29409  | 18.91 |
| Sequence 73 | 0.28214                | 0.000022                | 0.000754            | 0.000013             | 0.02309             | 0.00045              | 1.467244           | 0.000034                   | 0.282123651 | 1149     | -22.80884771 | 0.777976201 | 2.383164697  | 1556.4475           | 1802.993604 | 15.33 |
| Sequence 76 | 0.2822                 | 0.000023                | 0.0010322           | 0.0000098            | 0.03196             | 0.00024              | 1.467292           | 0.000036                   | 0.282194028 | 309      | -20.68709444 | 0.813338756 | -14.03345987 | 1484.2808           | 2173.725861 | 15.82 |
| Sequence 77 | 0.282842               | 0.000024                | 0.001228            | 0.000035             | 0.0327              | 0.001                | 1.467285           | 0.000043                   | 0.282835564 | 280      | 2.015665612  | 0.84870131  | 8.020659385  | 584.69225           | 763.2110426 | 17.47 |
| Sequence 82 | 0.282261               | 0.000018                | 0.0008109           | 0.0000028            | 0.02553             | 0.00016              | 1.467248           | 0.000041                   | 0.282242984 | 1177     | -18.52997861 | 0.636525983 | 7.250853824  | 1391.0361           | 1520.406154 | 20    |
| Sequence 83 | 0.282246               | 0.000017                | 0.0003478           | 0.0000041            | 0.00984             | 0.00013              | 1.467298           | 0.000033                   | 0.282237429 | 1304     | -19.06041692 | 0.601163428 | 9.947702157  | 1394.8973           | 1451.735388 | 18.94 |
| Sequence 84 | 0.282676               | 0.00002                 | 0.000681            | 0.000014             | 0.02012             | 0.00048              | 1.467261           | 0.000035                   | 0.282672162 | 301      | -3.85451845  | 0.707251092 | 2.707568034  | 808.9537            | 1117.423104 | 16.58 |
| Sequence 86 | 0.282196               | 0.000021                | 0.0005185           | 0.0000026            | 0.015804            | 0.000099             | 1.467306           | 0.00004                    | 0.282193341 | 274      | -20.82854465 | 0.742613646 | -14.83781087 | 1469.9285           | 2196.892485 | 14.47 |
| Sequence 87 | 0.282117               | 0.000022                | 0.0006214           | 0.0000089            | 0.01856             | 0.00025              | 1.467329           | 0.000043                   | 0.282103241 | 1173     | -23.62218647 | 0.777976201 | 2.205167978  | 1582.7318           | 1832.95376  | 16.98 |
| Sequence 88 | 0.282649               | 0.00002                 | 0.0006067           | 0.0000077            | 0.01506             | 0.00015              | 1.46728            | 0.000035                   | 0.282645809 | 281      | -4.809307424 | 0.707251092 | 1.328573971  | 845.05479           | 1189.076297 | 18.02 |
| Sequence 91 | 0.28183                | 0.00026                 | 0.00000164          | 0.00000047           | 0.00068             | 0.0006               | 1.467236           | 0.000029                   | 0.281829991 | 279      | -33.77123963 | 9.194264194 | -27.58335535 | 1945.0114           | 2986.227918 | 20.71 |

**T11-10**  
**El Chilar Complex**

|             |          |          |           |           |          |          |          |          |              |      |              |             |              |           |             |       |
|-------------|----------|----------|-----------|-----------|----------|----------|----------|----------|--------------|------|--------------|-------------|--------------|-----------|-------------|-------|
| Sequence 6  | 0.282206 | 0.000024 | 0.000954  | 0.000016  | 0.02822  | 0.00043  | 1.467311 | 0.000035 | 0.282183456  | 1251 | -20.47491911 | 0.84870131  | 6.825027387  | 1472.8748 | 1605.616449 | 16.53 |
| Sequence 7  | 0.282329 | 0.000027 | 0.000772  | 0.000027  | 0.01949  | 0.0007   | 1.467283 | 0.000039 | 0.282321425  | 523  | -16.12532489 | 0.954788974 | -4.740001928 | 1295.2172 | 1759.366265 | 17.02 |
| Sequence 8  | 0.282254 | 0.000019 | 0.0004596 | 0.0000035 | 0.013057 | 0.000077 | 1.467291 | 0.000035 | 0.282244831  | 1058 | -18.77751649 | 0.671888537 | 6.412512039  | 1387.9506 | 1591.957671 | 17.85 |
| Sequence 9  | 0.282533 | 0.000026 | 0.000949  | 0.000026  | 0.0232   | 0.00076  | 1.467298 | 0.000033 | 0.282528079  | 277  | -8.911363757 | 0.919426419 | -2.926464052 | 1015.7502 | 1454.500548 | 15.87 |
| Sequence 10 | 0.282171 | 0.00002  | 0.0004389 | 0.0000058 | 0.0126   | 0.0002   | 1.467287 | 0.000035 | 0.282161776  | 1114 | -21.71260852 | 0.707251092 | 2.939583472  | 1501.1983 | 1740.734643 | 19.56 |
| Sequence 11 | 0.282164 | 0.000021 | 0.000709  | 0.00002   | 0.02114  | 0.00053  | 1.467244 | 0.000042 | 0.282148937  | 1126 | -21.9601464  | 0.742613646 | 2.757019607  | 1521.4755 | 1761.574503 | 16.2  |
| Sequence 12 | 0.282654 | 0.000022 | 0.000897  | 0.000012  | 0.02566  | 0.00034  | 1.467287 | 0.000033 | 0.282649332  | 278  | -4.632494651 | 0.777976201 | 1.38630283   | 844.51555 | 1183.078529 | 17.69 |
| Sequence 13 | 0.282523 | 0.00002  | 0.0007432 | 0.0000089 | 0.0179   | 0.00029  | 1.467288 | 0.000034 | 0.282518895  | 295  | -9.264989303 | 0.707251092 | -2.849863714 | 1024.2071 | 1463.669066 | 16.7  |
| Sequence 14 | 0.28232  | 0.000018 | 0.000968  | 0.000025  | 0.02596  | 0.00066  | 1.467244 | 0.000038 | 0.282311213  | 484  | -16.44358788 | 0.636525983 | -5.975354486 | 1314.4849 | 1806.385241 | 17.33 |
| Sequence 15 | 0.282895 | 0.000025 | 0.001854  | 0.000076  | 0.0455   | 0.0019   | 1.467258 | 0.000036 | 0.282884447  | 304  | 3.889881005  | 0.884063865 | 10.2865836   | 517.77771 | 637.5036993 | 17.49 |
| Sequence 16 | 0.28252  | 0.000022 | 0.000532  | 0.000016  | 0.01539  | 0.00052  | 1.46729  | 0.000038 | 0.282517371  | 264  | -9.371076967 | 0.777976201 | -3.595280843 | 1022.712  | 1486.495966 | 17.03 |
| Sequence 21 | 0.282204 | 0.00002  | 0.000857  | 0.000023  | 0.02552  | 0.00072  | 1.467283 | 0.000033 | 0.282184976  | 1176 | -20.54564422 | 0.707251092 | 5.171369483  | 1471.8971 | 1649.948475 | 20.7  |
| Sequence 22 | 0.282192 | 0.000019 | 0.000314  | 0.000041  | 0.0096   | 0.0012   | 1.467235 | 0.00003  | 0.282186387  | 949  | -20.96999487 | 0.671888537 | 0.071275322  | 1467.6161 | 1790.556971 | 20.71 |
| Sequence 23 | 0.281272 | 0.000021 | 0.0003595 | 0.0000023 | 0.01075  | 0.000089 | 1.467311 | 0.000034 | 0.2821257814 | 2073 | -53.5035451  | 0.742613646 | -7.151159477 | 2715.0758 | 3112.919067 | 16.14 |

|             | 176Hf/177Hf<br>fstnorm | 176Hf/177Hf<br>corr 2SE | 176Lu/177Hf<br>corr | 176Lu/177Hf<br>corr 2SE | 176Yb/177Hf<br>corr | 176Yb/177Hf<br>corr 2SE | 178Hf/177Hf | 178Hf/177Hf<br>2SE | 176Hf/177Hf | t (age,<br>Ma) | εHf(0)       | ±2 sigma    | εHf(t)       | TDM       | TDM C*      | TotalHfBe<br>am (V) |
|-------------|------------------------|-------------------------|---------------------|-------------------------|---------------------|-------------------------|-------------|--------------------|-------------|----------------|--------------|-------------|--------------|-----------|-------------|---------------------|
| Sequence 24 | 0.282177               | 0.000019                | 0.0005373           | 0.0000022               | 0.016045            | 0.000078                | 1.467315    | 0.000037           | 0.282166066 | 1079           | -21.50043319 | 0.671888537 | 2.297039548  | 1496.7921 | 1753.394317 | 17.89               |
| Sequence 25 | 0.282176               | 0.000018                | 0.0005789           | 0.0000089               | 0.01724             | 0.000032                | 1.467242    | 0.000032           | 0.28216574  | 941            | -21.53579575 | 0.636525983 | -0.841414089 | 1499.7928 | 1841.287982 | 20.91               |
| Sequence 26 | 0.282285               | 0.000023                | 0.0000849           | 0.000026                | 0.02528             | 0.000085                | 1.467209    | 0.00003            | 0.282268289 | 1044           | -17.6812773  | 0.813338756 | 5.12638405   | 1359.0643 | 1548.702015 | 16.08               |
| Sequence 27 | 0.282869               | 0.000028                | 0.002791            | 0.000097                | 0.0698              | 0.0024                  | 1.467307    | 0.000036           | 0.282853533 | 296            | 2.970454586  | 0.990151529 | 9.01389942   | 570.04323 | 712.4711888 | 16                  |
| Sequence 28 | 0.282547               | 0.000021                | 0.0007308           | 0.0000053               | 0.01879             | 0.00015                 | 1.467261    | 0.000033           | 0.282543129 | 283            | -8.416287993 | 0.742613646 | -2.260112446 | 990.38322 | 1417.200816 | 17.3                |
| Sequence 29 | 0.281649               | 0.000018                | 0.0007547           | 0.0000087               | 0.02152             | 0.00025                 | 1.467276    | 0.000032           | 0.281622521 | 1847           | -40.17186202 | 0.636525983 | 0.581498188  | 2230.8013 | 2463.109695 | 17.9                |
| Sequence 30 | 0.282841               | 0.000019                | 0.0008              | 0.000011                | 0.02283             | 0.00024                 | 1.467242    | 0.000035           | 0.282836417 | 306            | 1.980303057  | 0.671888537 | 8.631628784  | 579.4817  | 744.7624465 | 18.78               |
| Sequence 31 | 0.282726               | 0.000019                | 0.000655            | 0.000019                | 0.0186              | 0.00055                 | 1.467267    | 0.000035           | 0.282722432 | 291            | -2.086390721 | 0.671888537 | 4.263109209  | 738.46558 | 1010.940407 | 19.32               |
| Sequence 32 | 0.282759               | 0.000022                | 0.001304            | 0.000034                | 0.03145             | 0.00088                 | 1.467248    | 0.00003            | 0.2827517   | 299            | -0.919426419 | 0.777976201 | 5.477451199  | 704.29024 | 940.091248  | 17.26               |
| Sequence 33 | 0.282199               | 0.00002                 | 0.000513            | 0.00002                 | 0.01557             | 0.00068                 | 1.467298    | 0.000037           | 0.282187808 | 1156           | -20.72245699 | 0.707251092 | 4.816936328  | 1465.5914 | 1656.367279 | 15.12               |
| Sequence 34 | 0.282213               | 0.000021                | 0.000719            | 0.000014                | 0.02306             | 0.00055                 | 1.467282    | 0.000045           | 0.282198739 | 1052           | -20.22738123 | 0.742613646 | 2.842575147  | 1454.1307 | 1698.07533  | 16.66               |
| Sequence 35 | 0.282106               | 0.000026                | 0.001296            | 0.000017                | 0.03584             | 0.00053                 | 1.467271    | 0.000036           | 0.282073738 | 1317           | -24.01117457 | 0.919426419 | 4.438724217  | 1626.4858 | 1806.906622 | 16.69               |
| Sequence 40 | 0.282162               | 0.000021                | 0.0006446           | 0.0000062               | 0.01934             | 0.00019                 | 1.467271    | 0.00004            | 0.282147629 | 1181           | -22.03087151 | 0.742613646 | 3.960938276  | 1521.6747 | 1729.603965 | 16.51               |
| Sequence 42 | 0.282184               | 0.000021                | 0.000949            | 0.000026                | 0.02783             | 0.00087                 | 1.467264    | 0.000032           | 0.282163386 | 1151           | -21.25289531 | 0.742613646 | 3.837407116  | 1503.2828 | 1713.710112 | 16.06               |
| Sequence 43 | 0.282555               | 0.000028                | 0.001688            | 0.000023                | 0.05165             | 0.00093                 | 1.467297    | 0.000034           | 0.282540314 | 464            | -8.133387556 | 0.990151529 | 1.686794876  | 1004.5086 | 1309.581208 | 18.13               |
| Sequence 44 | 0.282901               | 0.000022                | 0.001002            | 0.00001                 | 0.02398             | 0.00021                 | 1.467293    | 0.000035           | 0.282895146 | 312            | 4.102056333  | 0.777976201 | 10.84398506  | 497.52412 | 608.1991904 | 17.69               |
| Sequence 45 | 0.28236                | 0.000021                | 0.001189            | 0.000037                | 0.0339              | 0.0014                  | 1.467315    | 0.000037           | 0.282334853 | 1121           | -15.0290857  | 0.742613646 | 9.234454603  | 1265.9942 | 1351.387951 | 16.92               |
| Sequence 46 | 0.282454               | 0.000028                | 0.001492            | 0.000033                | 0.04546             | 0.00094                 | 1.467307    | 0.000037           | 0.2824254   | 1017           | -11.70500557 | 0.990151529 | 10.08261119  | 1142.8955 | 1215.43615  | 18.7                |
| Sequence 47 | 0.282139               | 0.000026                | 0.00075             | 0.000046                | 0.0229              | 0.0013                  | 1.467322    | 0.000037           | 0.282123967 | 1063           | -22.84421027 | 0.919426419 | 0.441682002  | 1557.6664 | 1856.682634 | 17.08               |
| Sequence 48 | 0.282151               | 0.000019                | 0.0005795           | 0.0000036               | 0.01747             | 0.00015                 | 1.467248    | 0.000032           | 0.282138202 | 1170           | -22.41985961 | 0.671888537 | 3.376511767  | 1534.2328 | 1757.467866 | 17.13               |
| Sequence 49 | 0.282753               | 0.000022                | 0.001144            | 0.000015                | 0.03146             | 0.00039                 | 1.467291    | 0.00004            | 0.28274636  | 310            | -1.131601747 | 0.777976201 | 5.534175142  | 709.79845 | 945.1347152 | 16.7                |
| Sequence 50 | 0.282418               | 0.000019                | 0.000247            | 0.000016                | 0.00748             | 0.00045                 | 1.467226    | 0.000037           | 0.282415357 | 570            | -12.97805753 | 0.671888537 | -0.359931271 | 1155.4668 | 1521.323723 | 17.87               |
| Sequence 51 | 0.282664               | 0.000019                | 0.00063             | 0.000013                | 0.01636             | 0.00036                 | 1.467313    | 0.000027           | 0.282660722 | 278            | -4.278869106 | 0.671888537 | 1.789310359  | 824.62949 | 1157.571997 | 17.88               |
| Sequence 52 | 0.282145               | 0.000022                | 0.001566            | 0.000029                | 0.04707             | 0.00081                 | 1.467297    | 0.000034           | 0.282111163 | 1145           | -22.63203494 | 0.777976201 | 1.849526158  | 1833.1963 | 1555.17     | 18.08               |
| Sequence 53 | 0.282438               | 0.000023                | 0.0012065           | 0.0000084               | 0.03675             | 0.00034                 | 1.467285    | 0.000028           | 0.28242623  | 520            | -12.27080644 | 0.813338756 | -1.096782045 | 1156.7687 | 1528.605998 | 20.3                |
| Sequence 54 | 0.282125               | 0.000023                | 0.000809            | 0.000015                | 0.02488             | 0.00055                 | 1.467284    | 0.00003            | 0.282106763 | 1194           | -23.33928603 | 0.813338756 | 2.807691756  | 1579.4478 | 1811.859802 | 19.47               |
| Sequence 59 | 0.282315               | 0.000023                | 0.0004492           | 0.0000074               | 0.01224             | 0.00017                 | 1.467276    | 0.000041           | 0.282306047 | 1057           | -16.62040066 | 0.813338756 | 6.759715703  | 1303.6187 | 1456.402777 | 19.2                |
| Sequence 60 | 0.282356               | 0.000031                | 0.000926            | 0.000089                | 0.0281              | 0.0027                  | 1.467301    | 0.000033           | 0.28234646  | 549            | -15.17053592 | 1.096239192 | -3.270613491 | 1262.797  | 1687.575485 | 18.8                |
| Sequence 61 | 0.282273               | 0.000028                | 0.0009741           | 0.0000098               | 0.02932             | 0.00027                 | 1.467305    | 0.00003            | 0.282251042 | 1194           | -18.10562795 | 0.990151529 | 7.923442014  | 1380.2892 | 1491.640696 | 13.57               |
| Sequence 62 | 0.282893               | 0.000026                | 0.001715            | 0.000024                | 0.04151             | 0.00052                 | 1.467293    | 0.000037           | 0.282883432 | 298            | 3.819155896  | 0.919426419 | 10.11656735  | 518.71729 | 643.622649  | 17.14               |
| Sequence 63 | 0.282593               | 0.000025                | 0.000984            | 0.000054                | 0.0236              | 0.0014                  | 1.467293    | 0.00004            | 0.282587732 | 286            | -6.789610481 | 0.884063865 | -0.614891898 | 932.34864 | 1315.792557 | 14.94               |
| Sequence 64 | 0.282153               | 0.000026                | 0.000611            | 0.000029                | 0.01791             | 0.00082                 | 1.467343    | 0.000036           | 0.282139949 | 1132           | -22.3491345  | 0.919426419 | 2.574694803  | 1532.7388 | 1777.678486 | 13.73               |
| Sequence 65 | 0.28225                | 0.000022                | 0.000517            | 0.00002                 | 0.01454             | 0.00058                 | 1.467285    | 0.000044           | 0.282240375 | 988            | -18.91896671 | 0.777976201 | 2.867554482  | 1395.5369 | 1646.229658 | 17.11               |
| Sequence 66 | 0.28226                | 0.000019                | 0.0004416           | 0.0000221               | 0.013155            | 0.000042                | 1.467281    | 0.000034           | 0.282522207 | 937            | -18.56534116 | 0.671888537 | 2.132221039  | 1379.0503 | 1652.243987 | 18.68               |
| Sequence 67 | 0.282572               | 0.000029                | 0.001049            | 0.000067                | 0.027               | 0.0018                  | 1.467281    | 0.000043           | 0.282566344 | 288            | -7.532224128 | 1.025514083 | -1.327058301 | 963.54267 | 1362.281793 | 17.63               |
| Sequence 69 | 0.282425               | 0.00002                 | 0.001205            | 0.000021                | 0.02962             | 0.00052                 | 1.467315    | 0.000036           | 0.282418797 | 275            | -12.73051965 | 0.707251092 | -6.837934477 | 1175.0398 | 1698.639435 | 17.15               |
| Sequence 70 | 0.282394               | 0.000018                | 0.00007842          | 0.0000088               | 0.003237            | 0.000039                | 1.467262    | 0.000037           | 0.282393204 | 541            | -13.82675885 | 0.636525983 | -1.795067521 | 1183.2598 | 1588.827366 | 20.5                |
| Sequence 71 | 0.282066               | 0.000028                | 0.000573            | 0.000037                | 0.0171              | 0.0011                  | 1.467272    | 0.000044           | 0.28204944  | 1526           | -25.42567675 | 0.990151529 | 8.3560583    | 1650.8047 | 1727.606977 | 18.8                |
| Sequence 72 | 0.282311               | 0.000027                | 0.0003739           | 0.0000079               | 0.01106             | 0.00028                 | 1.467291    | 0.000035           | 0.282302921 | 1145           | -16.76185088 | 0.954788974 | 8.64803425   | 1306.5671 | 1407.307167 | 12.43               |
| Sequence 73 | 0.281795               | 0.000022                | 0.0005976           | 0.0000072               | 0.01755             | 0.00025                 | 1.467245    | 0.000038           | 0.281774564 | 1801           | -35.00892905 | 0.777976201 | 4.919905327  | 2022.8907 | 2159.005938 | 16.88               |
| Sequence 78 | 0.28249                | 0.000022                | 0.001157            | 0.00003                 | 0.02822             | 0.00076                 | 1.467262    | 0.000033           | 0.282484066 | 274            | -10.4319536  | 0.777976201 | -4.550751652 | 1082.0084 | 1554.334832 | 16.8                |
| Sequence 79 | 0.282515               | 0.000033                | 0.001249            | 0.000069                | 0.0317              | 0.0018                  | 1.467283    | 0.000044           | 0.282508758 | 267            | -9.54788974  | 1.166964302 | -3.831144273 | 1049.3284 | 1503.788781 | 20.1                |
| Sequence 80 | 0.28263                | 0.000021                | 0.000849            | 0.000015                | 0.02115             | 0.00037                 | 1.467279    | 0.000039           | 0.282625709 | 270            | -5.481195962 | 0.742613646 | 0.371930757  | 877.13208 | 1240.979637 | 16.91               |
| Sequence 81 | 0.282036               | 0.000066                | 0.0014              | 0.000033                | 0.0362              | 0.001                   | 1.467457    | 0.000077           | 0.28199239  | 1643           | -26.48655339 | 2.333928603 | 9.016669885  | 1729.1927 | 1779.223966 | 6.78                |
| Sequence 82 | 0.282161               | 0.000025                | 0.000381            | 0.000017                | 0.01157             | 0.00057                 | 1.467321    | 0.000044           | 0.282153871 | 993            | -22.06623406 | 0.884063865 | -0.085003709 | 1512.6414 | 1834.743864 | 16.57               |
| Sequence 83 | 0.281851               | 0.000022                | 0.000696            | 0.000015                | 0.02175             | 0.00042                 | 1.46728     | 0.000034           | 0.281836479 | 1106           | -33.02862599 | 0.777976201 | -8.774028048 | 1591.4194 | 2461.713457 | 18.69               |
| Sequence 84 | 0.282173               | 0.000032                | 0.001461            | 0.000065                | 0.0424              | 0.0019                  | 1.467308    | 0.000034           | 0.282139982 | 1197           | -21.64188341 | 0.954788974 | 4.053808691  | 1539.3262 | 1736.398048 | 17.31               |
| Sequence 85 | 0.282115               | 0.000024                | 0.000407            | 0.000037                | 0.0124              | 0.0011                  | 1.46727     | 0.000035           | 0.282107562 | 970            | -23.69291158 | 0.84870131  | -2.246933989 | 1576.668  | 1951.556248 | 17.91               |
| Sequence 86 | 0.282844               | 0.000028                | 0.001505            | 0.000047                | 0.0346              | 0.0013                  | 1.467291    | 0.000038           | 0.282835321 | 308            | 2.086390721  | 0.990151529 | 8.637545424  | 586.18615 | 745.9642665 | 14.76               |
| Sequence 87 | 0.282111               | 0.000023                | 0.0003416           | 0.000001                | 0.010499            | 0.000029                | 1.467285    | 0.000038           | 0.282104816 | 961            | -23.83436179 | 0.813338756 | -2.547936491 | 1579.4642 | 1963.28041  | 14.87               |
| Sequence 88 | 0.282149               | 0.000025                | 0.000899            | 0.000012                | 0.0262              | 0.00043                 | 1.467273    | 0.00004            | 0.282127945 | 1240           | -22.49058472 | 0.884063865 | 4.605901756  | 1549.8923 | 1735.773432 | 15.05               |

**T11-II**  
**El Chilar Complex**

|             |          |          |           |           |          |          |          |          |             |      |              |             |              |           |             |       |
|-------------|----------|----------|-----------|-----------|----------|----------|----------|----------|-------------|------|--------------|-------------|--------------|-----------|-------------|-------|
| Sequence 5  | 0.281866 | 0.000028 | 0.001436  | 0.000094  | 0.0432   | 0.0027   | 1.467292 | 0.000031 | 0.281825216 | 1500 | -32.49818767 | 0.990151529 | -0.195713903 | 1968.8221 | 2238.71171  | 16.72 |
| Sequence 6  | 0.281913 | 0.000027 | 0.001249  | 0.000061  | 0.0365   | 0.002    | 1.467254 | 0.000037 | 0.281876328 | 1550 | -30.8361476  | 0.954788974 | 2.763215575  | 1893.7234 | 2094.688082 | 16.02 |
| Sequence 7  | 0.281908 | 0.000022 | 0.0009073 | 0.000002  | 0.025735 | 0.000034 | 1.467304 | 0.000034 | 0.281881483 | 1543 | -31.01296038 | 0.777976201 | 2.785704049  | 1883.6599 | 2087.782483 | 14.85 |
| Sequence 8  | 0.28201  | 0.000024 | 0.00146   | 0.000012  | 0.04094  | 0.00039  | 1.467296 | 0.000035 | 0.281980735 | 1063 | -27.40597981 | 0.84870131  | -4.635443889 | 1768.4437 | 2172.432616 | 20.4  |
| Sequence 9  | 0.282122 | 0.000035 | 0.002628  | 0.000062  | 0.0814   | 0.002    | 1.467297 | 0.000033 | 0.282050741 | 1433 | -23.44537369 | 1.237689411 | 6.272748232  | 1662.8863 | 1784.033687 | 17.51 |
| Sequence 10 | 0.281954 | 0.000032 | 0.001062  | 0.000046  | 0.0322   | 0.0015   | 1.467473 | 0.000033 | 0.281942297 | 587  | -29.38628827 | 1.131601747 | -16.72878174 | 1827.592  | 2553.111507 | 13.23 |
| Sequence 11 | 0.281902 | 0.000021 | 0.000808  | 0.000012  | 0.02278  | 0.00037  | 1.467359 | 0.000032 | 0.281887848 | 930  | -31.2251357  | 0.742613646 | -10.93767869 | 1887.024  | 2459.232846 | 17.6  |
| Sequence 12 | 0.281733 | 0.000021 | 0.0005188 | 0.0000053 | 0.01493  | 0.0002   | 1.467324 | 0.00003  | 0.281717049 | 1622 | -37.20140743 | 0.742613646 | -1.238248007 | 2103.1164 | 2398.70718  | 16.12 |
| Sequence 13 | 0.281866 | 0.000026 | 0.001224  | 0.0000033 | 0.03602  | 0.00093  | 1.467258 | 0.000033 | 0.281830415 | 1535 | -32.49818767 | 0.919426419 | 2.790226054  | 1957.7196 | 2205.154    | 14.94 |

|             | 176Hf/177Hf<br>fstnorm | 176Hf/177Hf<br>corr 2SE | 176Lu/177Hf<br>corr | 176Lu/177Hf<br>corr 2SE | 176Yb/177Hf<br>corr | 176Yb/177Hf<br>corr 2SE | 178Hf/177Hf | 178Hf/177Hf<br>2SE | 176Hf/177Hf | t (age,<br>Ma) | εHf(0)       | ±2 sigma    | εHf(t)       | TDM       | TDM C*      | TotalHfBe<br>am (V) |
|-------------|------------------------|-------------------------|---------------------|-------------------------|---------------------|-------------------------|-------------|--------------------|-------------|----------------|--------------|-------------|--------------|-----------|-------------|---------------------|
| Sequence 14 | 0.281951               | 0.00002                 | 0.000649            | 0.000015                | 0.01926             | 0.00037                 | 1.467272    | 0.000032           | 0.281936618 | 1174           | -29.49237053 | 0.707251092 | -3.679880327 | 1812.0466 | 2199.627505 | 17.24               |
| Sequence 15 | 0.282032               | 0.000033                | 0.001835            | 0.000014                | 0.05419             | 0.00032                 | 1.467286    | 0.000037           | 0.281980906 | 1471           | -26.62800361 | 1.166964302 | 4.664549411  | 1755.1027 | 1914.280892 | 13.57               |
| Sequence 16 | 0.282535               | 0.000032                | 0.001222            | 0.000028                | 0.0358              | 0.0012                  | 1.467338    | 0.000038           | 0.282519364 | 681            | -8.840638648 | 1.131601747 | 5.818586984  | 1020.3112 | 1219.097956 | 11.87               |
| Sequence 17 | 0.281962               | 0.000027                | 0.00108             | 0.000025                | 0.03227             | 0.00078                 | 1.467313    | 0.000038           | 0.281933088 | 1415           | -29.10338243 | 0.954788974 | 1.687339291  | 1817.3612 | 2055.288463 | 14.32               |
| Sequence 18 | 0.282492               | 0.000025                | 0.001422            | 0.00002                 | 0.03611             | 0.00057                 | 1.467264    | 0.000028           | 0.282484867 | 268            | -10.3612285  | 0.884063865 | -4.656203539 | 1086.8455 | 1556.308872 | 16.42               |
| Sequence 23 | 0.281936               | 0.000044                | 0.001524            | 0.000093                | 0.0459              | 0.0028                  | 1.467303    | 0.000036           | 0.281892805 | 1497           | -30.02280885 | 1.555952402 | 2.133796598  | 1875.3491 | 2092.032785 | 16.6                |
| Sequence 24 | 0.281833               | 0.000028                | 0.0008116           | 0.0000069               | 0.02352             | 0.00022                 | 1.467274    | 0.000036           | 0.281811196 | 1420           | -33.66515197 | 0.990151529 | -2.5226263   | 1982.0357 | 2319.971394 | 16.12               |
| Sequence 25 | 0.282199               | 0.000018                | 0.0004412           | 0.0000051               | 0.01214             | 0.00016                 | 1.467323    | 0.000029           | 0.282190375 | 1037           | -20.72245699 | 0.636525983 | 2.205929923  | 1462.8568 | 1726.113922 | 15.72               |
| Sequence 26 | 0.281956               | 0.000023                | 0.0013              | 0.00004                 | 0.0396              | 0.0012                  | 1.467286    | 0.000036           | 0.28191753  | 1562           | -29.31555776 | 0.813338756 | 4.50048061   | 1836.3271 | 1996.287787 | 18.7                |
| Sequence 27 | 0.281897               | 0.000024                | 0.000718            | 0.000024                | 0.02085             | 0.00064                 | 1.467305    | 0.000036           | 0.281882362 | 1081           | -31.40194848 | 0.84870131  | -7.714445712 | 1889.4565 | 2376.960784 | 17.56               |
| Sequence 28 | 0.281987               | 0.000034                | 0.00197             | 0.00003                 | 0.0642              | 0.001                   | 1.46729     | 0.000039           | 0.281932109 | 1472           | -28.21931856 | 1.202326856 | 2.956126914  | 1825.4842 | 2021.310983 | 17.1                |
| Sequence 29 | 0.282026               | 0.000026                | 0.001644            | 0.000055                | 0.0484              | 0.0015                  | 1.467319    | 0.000027           | 0.281980508 | 1462           | -26.84017893 | 0.919426419 | 4.444468908  | 1754.5917 | 1920.88039  | 14.48               |
| Sequence 30 | 0.282691               | 0.000025                | 0.001051            | 0.000025                | 0.03023             | 0.00087                 | 1.467304    | 0.000029           | 0.282686201 | 244            | -3.324080132 | 0.884063865 | 1.932358923  | 795.71688 | 1121.918063 | 13.98               |
| Sequence 31 | 0.282507               | 0.000025                | 0.001242            | 0.000015                | 0.03092             | 0.00029                 | 1.46732     | 0.000034           | 0.282501189 | 250            | -9.830790176 | 0.884063865 | -4.79956148  | 1060.4395 | 1531.274082 | 16.31               |
| Sequence 32 | 0.282299               | 0.000023                | 0.0005508           | 0.0000076               | 0.01419             | 0.00024                 | 1.467263    | 0.000036           | 0.28228776  | 1082           | -17.18620153 | 0.813338756 | 6.678989919  | 1329.1675 | 1481.222656 | 16.32               |
| Sequence 33 | 0.282092               | 0.000034                | 0.00251             | 0.0001                  | 0.0724              | 0.0027                  | 1.467281    | 0.000043           | 0.282015407 | 1610           | -24.50625033 | 1.202326856 | 9.075537849  | 1700.8926 | 1749.344367 | 11.62               |
| Sequence 34 | 0.281859               | 0.000024                | 0.000702            | 0.00001                 | 0.01985             | 0.00031                 | 1.467306    | 0.000035           | 0.28183855  | 1538           | -32.74572555 | 0.84870131  | 1.147653527  | 1940.7635 | 2185.379953 | 16.52               |
| Sequence 35 | 0.282267               | 0.000031                | 0.0006575           | 0.0000084               | 0.01873             | 0.00035                 | 1.467309    | 0.000037           | 0.282254584 | 1002           | -18.31780328 | 1.096239192 | 3.688351059  | 1377.1568 | 1605.8085   | 17.4                |
| Sequence 36 | 0.281993               | 0.00002                 | 0.001301            | 0.000012                | 0.03731             | 0.00029                 | 1.467302    | 0.000035           | 0.281956001 | 1502           | -28.00714324 | 0.707251092 | 4.490610062  | 1784.7324 | 1949.561737 | 15.86               |
| Sequence 37 | 0.282459               | 0.000023                | 0.0008135           | 0.0000047               | 0.0244              | 0.00015                 | 1.467322    | 0.000033           | 0.282449483 | 623            | -11.5281928  | 0.813338756 | 2.038999176  | 1115.5012 | 1411.895148 | 15.28               |
| Sequence 38 | 0.282136               | 0.000023                | 0.001113            | 0.0000062               | 0.03346             | 0.00017                 | 1.467335    | 0.00003            | 0.282110868 | 1196           | -22.95029793 | 0.813338756 | 2.998735402  | 1576.7949 | 1801.508539 | 17.8                |
| Sequence 39 | 0.281987               | 0.000025                | 0.000875            | 0.000018                | 0.0255              | 0.00066                 | 1.467267    | 0.000035           | 0.281962939 | 1453           | -28.21931856 | 0.884063865 | 3.615206377  | 1773.0875 | 1965.380877 | 13.17               |
| Sequence 44 | 0.281989               | 0.000023                | 0.000212            | 0.000009                | 0.00566             | 0.00034                 | 1.46735     | 0.000039           | 0.281983402 | 1396           | -28.14859345 | 0.813338756 | 3.038033097  | 1740.084  | 1956.398973 | 12.61               |
| Sequence 45 | 0.281916               | 0.000021                | 0.000764            | 0.000031                | 0.02095             | 0.00085                 | 1.467281    | 0.000031           | 0.281892319 | 1635           | -30.73005994 | 0.742613646 | 5.281004237  | 1865.6176 | 2005.435534 | 16.3                |
| Sequence 46 | 0.281849               | 0.000027                | 0.000862            | 0.000033                | 0.0247              | 0.00083                 | 1.46729     | 0.00004            | 0.281827113 | 1343           | -33.0993511  | 0.954788974 | -3.715646981 | 1962.6441 | 2333.581044 | 14.8                |
| Sequence 47 | 0.282132               | 0.000021                | 0.000287            | 0.000011                | 0.00827             | 0.00035                 | 1.467311    | 0.000035           | 0.28212646  | 1024           | -23.09174815 | 0.742613646 | -0.354178058 | 1548.5709 | 1875.789085 | 16.5                |
| Sequence 48 | 0.282044               | 0.000026                | 0.001042            | 0.000033                | 0.02858             | 0.00087                 | 1.467321    | 0.000048           | 0.282013766 | 1532           | -26.20365295 | 0.919426419 | 7.227703512  | 1701.774  | 1802.787783 | 13.32               |
| Sequence 49 | 0.282276               | 0.000024                | 0.000402            | 0.0000085               | 0.01439             | 0.00031                 | 1.467292    | 0.000033           | 0.28226736  | 1139           | -17.99954029 | 0.84870131  | 7.250846631  | 1355.6461 | 1490.357435 | 20.12               |
| Sequence 50 | 0.281958               | 0.000027                | 0.0005584           | 0.0000053               | 0.01654             | 0.00014                 | 1.46731     | 0.000045           | 0.281944078 | 1319           | -29.24483265 | 0.954788974 | -0.114385905 | 1798.2007 | 2091.820001 | 12.81               |
| Sequence 51 | 0.282216               | 0.000026                | 0.000863            | 0.000013                | 0.02573             | 0.00044                 | 1.467304    | 0.000031           | 0.282200081 | 979            | -20.12129356 | 0.919426419 | 1.235676678  | 1455.4679 | 1741.283247 | 14.63               |
| Sequence 52 | 0.282014               | 0.00002                 | 0.000327            | 0.000013                | 0.00997             | 0.00041                 | 1.467334    | 0.000028           | 0.282008148 | 950            | -27.26452959 | 0.707251092 | -6.222498524 | 1711.2014 | 2183.053585 | 15.26               |
| Sequence 53 | 0.281942               | 0.000023                | 0.0002131           | 0.000004                | 0.00788             | 0.00012                 | 1.467321    | 0.000031           | 0.281936091 | 1465           | -29.81063352 | 0.813338756 | 2.937222936  | 1803.9113 | 2016.975325 | 20.1                |
| Sequence 54 | 0.282197               | 0.000026                | 0.001241            | 0.000051                | 0.0365              | 0.0017                  | 1.467284    | 0.000034           | 0.282172219 | 1059           | -20.7931821  | 0.919426419 | 2.061351066  | 1496.7113 | 1752.421628 | 16                  |
| Sequence 55 | 0.281653               | 0.000023                | 0.000408            | 0.0000037               | 0.01132             | 0.00015                 | 1.467304    | 0.000037           | 0.28164483  | 1062           | -40.0304118  | 0.813338756 | -16.56492127 | 2205.4467 | 2906.325504 | 15.77               |
| Sequence 56 | 0.281908               | 0.000026                | 0.001173            | 0.000016                | 0.0338              | 0.00035                 | 1.467374    | 0.000044           | 0.281872838 | 1582           | -31.01296038 | 0.919426419 | 3.373098135  | 1896.8688 | 2082.057656 | 15.34               |
| Sequence 57 | 0.281893               | 0.000026                | 0.001183            | 0.000016                | 0.03283             | 0.00039                 | 1.467306    | 0.000044           | 0.28185731  | 1592           | -31.5433987  | 0.919426419 | 3.051442842  | 1918.2018 | 2109.885523 | 14.1                |
| Sequence 58 | 0.282079               | 0.000039                | 0.002571            | 0.000039                | 0.0832              | 0.0015                  | 1.467299    | 0.000033           | 0.282000744 | 1606           | -24.96596354 | 1.379139629 | 8.463261769  | 1722.5651 | 1784.376172 | 15.57               |
| Sequence 59 | 0.281987               | 0.000019                | 0.0004253           | 0.0000066               | 0.01255             | 0.00012                 | 1.467295    | 0.000037           | 0.281978443 | 1067           | -28.21931856 | 0.671888537 | -4.626013056 | 1752.4301 | 2174.959593 | 16.15               |
| Sequence 60 | 0.281885               | 0.000031                | 0.001219            | 0.000023                | 0.03381             | 0.0008                  | 1.467307    | 0.000032           | 0.281851923 | 1434           | -31.82629913 | 1.096239192 | -0.75783317  | 1931.1438 | 2221.783007 | 15.69               |
| Sequence 65 | 0.281982               | 0.000029                | 0.000635            | 0.000037                | 0.0187              | 0.0011                  | 1.467302    | 0.000046           | 0.281968073 | 1162           | -28.39613134 | 1.025514083 | -2.837301357 | 1768.8642 | 2138.033654 | 12.93               |
| Sequence 66 | 0.281937               | 0.000027                | 0.001225            | 0.000035                | 0.0357              | 0.001                   | 1.467332    | 0.000041           | 0.28190148  | 1531           | -29.98744629 | 0.954788974 | 3.220323716  | 1859.1329 | 2051.36084  | 14.44               |
| Sequence 67 | 0.281851               | 0.000021                | 0.0007193           | 0.0000061               | 0.0199              | 0.00015                 | 1.467312    | 0.000032           | 0.281829383 | 1586           | -33.02862599 | 0.742613646 | 1.9226661    | 1952.6044 | 2175.111262 | 16.32               |
| Sequence 68 | 0.282086               | 0.000024                | 0.000576            | 0.000016                | 0.01672             | 0.00052                 | 1.467308    | 0.000035           | 0.282071717 | 1312           | -24.71842566 | 0.84870131  | 4.252957629  | 1623.4646 | 1814.556209 | 14.79               |
| Sequence 69 | 0.282152               | 0.000022                | 0.0008567           | 0.0000089               | 0.0259              | 0.00019                 | 1.467345    | 0.000031           | 0.282135888 | 998            | -22.38449706 | 0.777976201 | -0.609098904 | 1544.0128 | 1871.352178 | 15.21               |
| Sequence 70 | 0.281195               | 0.000026                | 0.001021            | 0.000013                | 0.02953             | 0.00042                 | 1.467308    | 0.000038           | 0.281146115 | 2505           | -56.2264618  | 0.919426419 | -1.072005471 | 2866.5956 | 3081.451235 | 12.58               |
| Sequence 71 | 0.282076               | 0.000023                | 0.0004888           | 0.0000089               | 0.01456             | 0.00027                 | 1.467318    | 0.000041           | 0.282067272 | 948            | -25.0720512  | 0.813338756 | -4.17253301  | 1633.492  | 2054.225341 | 14.75               |
| Sequence 72 | 0.281873               | 0.000019                | 0.0009447           | 0.0000069               | 0.02761             | 0.00023                 | 1.467303    | 0.000037           | 0.281846859 | 1462           | -32.25064979 | 0.671888537 | -0.297303417 | 1933.8057 | 2215.212599 | 17.51               |
| Sequence 73 | 0.282024               | 0.000028                | 0.000958            | 0.00004                 | 0.0277              | 0.0012                  | 1.467278    | 0.000031           | 0.281999859 | 1333           | -26.91090404 | 0.990151529 | 2.183390364  | 1725.7266 | 1960.021062 | 16.4                |
| Sequence 74 | 0.281903               | 0.000021                | 0.000641            | 0.00003                 | 0.01683             | 0.00069                 | 1.467282    | 0.000033           | 0.281891408 | 960            | -31.18977315 | 0.742613646 | -10.13347057 | 1877.4531 | 2432.749537 | 17.4                |
| Sequence 75 | 0.282108               | 0.000025                | 0.0005922           | 0.0000078               | 0.01704             | 0.00026                 | 1.467308    | 0.000042           | 0.28209491  | 1171           | -23.94044946 | 0.884063865 | 1.864313853  | 1593.905  | 1852.644032 | 15.77               |
| Sequence 76 | 0.28182                | 0.000025                | 0.000804            | 0.000034                | 0.0229              | 0.0011                  | 1.467305    | 0.00004            | 0.281795698 | 1595           | -34.12486518 | 0.884063865 | 0.933644611  | 1999.4874 | 2243.39592  | 14.56               |
| Sequence 77 | 0.282091               | 0.000016                | 0.0000584           | 0.0000291               | 0.002093            | 0.000069                | 1.467286    | 0.000033           | 0.282089799 | 1090           | -24.54161289 | 0.565800873 | -0.156885629 | 1595.0394 | 1915.136597 | 22.8                |
| Sequence 78 | 0.281976               | 0.000026                | 0.000532            | 0.000048                | 0.0143              | 0.0013                  | 1.467267    | 0.000038           | 0.28196186  | 1405           | -28.60830666 | 0.919426419 | 2.479502738  | 1772.3423 | 1998.212633 | 11.96               |
| Sequence 79 | 0.282406               | 0.00003                 | 0.001144            | 0.000037                |                     |                         |             |                    |             |                |              |             |              |           |             |                     |

|             | 176Hf/177Hf<br>fstnorm | 176Hf/177Hf<br>corr 2SE | 176Lu/177Hf<br>corr | 176Lu/177Hf<br>corr 2SE | 176Yb/177Hf<br>corr | 176Yb/177Hf<br>corr 2SE | 178Hf/177Hf | 178Hf/177Hf<br>2SE | 176Hf/177Hf | t (age,<br>Ma) | εHf(0)       | ±2 sigma    | εHf(t)       | TDM       | TDM C*      | TotalHfBe<br>am (V) |
|-------------|------------------------|-------------------------|---------------------|-------------------------|---------------------|-------------------------|-------------|--------------------|-------------|----------------|--------------|-------------|--------------|-----------|-------------|---------------------|
| Sequence 98 | 0.282041               | 0.000024                | 0.0007017           | 0.0000044               | 0.01966             | 0.00014                 | 1.467245    | 0.000031           | 0.282028537 | 943            | -26.30974062 | 0.84870131  | -5.658283006 | 1690.7816 | 2142.619015 | 16.09               |
| Sequence 99 | 0.281626               | 0.000018                | 0.000025            | 0.000002                | 0.000875            | 0.000072                | 1.467216    | 0.000031           | 0.281625732 | 571            | -40.98520077 | 0.636525983 | -28.29625627 | 2220.0454 | 3249.330632 | 21.27               |

#### T12-10

##### San Juan de la Rosa Fm. (rhyolite)

|             |           |          |          |          |         |          |          |          |             |       |              |             |             |           |             |       |
|-------------|-----------|----------|----------|----------|---------|----------|----------|----------|-------------|-------|--------------|-------------|-------------|-----------|-------------|-------|
| Sequence 85 | 0.2827852 | 0.000038 | 0.003073 | 0.000086 | 0.0794  | 0.0024   | 1.467389 | 0.000063 | 0.282777387 | 136   | 0.007072511  | 1.343777074 | 2.752399071 | 700.12174 | 985.3852069 | 15    |
| Sequence 86 | 0.282865  | 0.00004  | 0.002186 | 0.000093 | 0.0558  | 0.0024   | 1.467439 | 0.000066 | 0.282859442 | 136   | 2.829004367  | 1.414502184 | 5.654952445 | 566.42385 | 800.6693966 | 15.5  |
| Sequence 87 | 0.282816  | 0.000029 | 0.002401 | 0.000039 | 0.06401 | 0.000097 | 1.467383 | 0.000061 | 0.282809671 | 141   | 1.096239192  | 1.025514083 | 4.005661777 | 641.87451 | 909.6273895 | 19.3  |
| Sequence 88 | 0.282851  | 0.00004  | 0.00339  | 0.00014  | 0.0904  | 0.0036   | 1.467337 | 0.000053 | 0.282842064 | 141   | 2.333928603  | 1.414502184 | 5.151521915 | 606.97858 | 836.6796297 | 13.73 |
| Sequence 89 | 0.282853  | 0.000032 | 0.002636 | 0.000031 | 0.06845 | 0.00095  | 1.46733  | 0.00005  | 0.282846249 | 137   | 2.404653712  | 1.131601747 | 5.21051757  | 591.29026 | 829.7795498 | 15.5  |
| Sequence 90 | 0.282808  | 0.000028 | 0.002406 | 0.000067 | 0.0607  | 0.0016   | 1.467338 | 0.000058 | 0.282801991 | 133.6 | 0.813338756  | 0.990151529 | 3.569306672 | 653.72464 | 931.5816416 | 17.45 |
| Sequence 91 | 0.282816  | 0.000056 | 0.003108 | 0.00007  | 0.0808  | 0.0018   | 1.467309 | 0.000095 | 0.282807982 | 138   | 1.096239192  | 1.980303057 | 3.87914264  | 654.65483 | 915.3238456 | 17.9  |
| Sequence 92 | 0.282817  | 0.000044 | 0.00307  | 0.0001   | 0.08    | 0.0028   | 1.467309 | 0.000067 | 0.282808735 | 144   | 1.131601747  | 1.555952402 | 4.039332538 | 652.45731 | 909.8377207 | 15.6  |
| Sequence 93 | 0.282218  | 0.000025 | 0.00133  | 0.000011 | 0.03472 | 0.00017  | 1.467378 | 0.000048 | 0.28218652  | 1253  | -20.05056845 | 0.884063865 | 6.979254887 | 1470.7422 | 1597.536202 | 15.1  |
| Sequence 94 | 0.282831  | 0.000034 | 0.003978 | 0.000087 | 0.1063  | 0.0025   | 1.467312 | 0.000053 | 0.282820589 | 140   | 1.626677511  | 1.202326856 | 4.369598297 | 648.04282 | 885.6847208 | 17.8  |
| Sequence 95 | 0.282775  | 0.000033 | 0.002418 | 0.000027 | 0.06226 | 0.00071  | 1.467433 | 0.000071 | 0.282768898 | 135   | -0.353625546 | 1.166964302 | 2.429846111 | 702.4462  | 1005.090497 | 15.1  |

#### MP-6

##### Mineral de Pozos Sandstone

|             |          |          |           |           |          |          |          |          |             |      |              |             |              |           |             |       |
|-------------|----------|----------|-----------|-----------|----------|----------|----------|----------|-------------|------|--------------|-------------|--------------|-----------|-------------|-------|
| Sequence 4  | 0.282826 | 0.00003  | 0.0005913 | 0.0000042 | 0.013453 | 0.000044 | 1.467346 | 0.000061 | 0.282824906 | 99   | 1.449864738  | 1.060876638 | 3.610157209  | 597.31845 | 901.8707934 | 23.2  |
| Sequence 5  | 0.282667 | 0.000028 | 0.000903  | 0.000063  | 0.02     | 0.0013   | 1.467376 | 0.000057 | 0.282665448 | 92   | -4.172781442 | 0.990151529 | -2.185500945 | 826.36744 | 1263.965253 | 17.9  |
| Sequence 6  | 0.281698 | 0.000032 | 0.0005676 | 0.0000043 | 0.014825 | 0.00009  | 1.467296 | 0.000049 | 0.281679904 | 1681 | -38.43909684 | 1.131601747 | -1.202025329 | 2153.3969 | 2442.69305  | 15.22 |
| Sequence 7  | 0.282591 | 0.000028 | 0.000656  | 0.000012  | 0.01441  | 0.00024  | 1.467472 | 0.000053 | 0.282587611 | 276  | -6.860335591 | 0.990151529 | -0.842290009 | 927.10546 | 1322.349557 | 13.8  |
| Sequence 8  | 0.282954 | 0.000034 | 0.001601  | 0.000039  | 0.03636  | 0.00079  | 1.467407 | 0.000055 | 0.282950978 | 101  | 5.976271726  | 1.202326856 | 8.113865201  | 429.11188 | 616.0899563 | 15.4  |
| Sequence 9  | 0.282808 | 0.00002  | 0.0005639 | 0.0000065 | 0.01286  | 0.00014  | 1.467345 | 0.000041 | 0.282806957 | 99   | 0.813338756  | 0.707251092 | 2.975284236  | 622.08129 | 942.2549674 | 20    |
| Sequence 10 | 0.282827 | 0.00002  | 0.000537  | 0.000011  | 0.01321  | 0.00027  | 1.467358 | 0.000035 | 0.282826087 | 91   | 1.485227293  | 0.707251092 | 3.474039955  | 595.0676  | 904.2645729 | 22.3  |
| Sequence 11 | 0.282802 | 0.000019 | 0.0005376 | 0.0000087 | 0.01269  | 0.00018  | 1.467333 | 0.000038 | 0.282801005 | 99   | 0.601163428  | 0.671888537 | 2.764783238  | 630.04095 | 955.6381854 | 20.1  |
| Sequence 12 | 0.282539 | 0.00002  | 0.0007601 | 0.0000064 | 0.01963  | 0.00016  | 1.467315 | 0.000032 | 0.282535458 | 249  | -8.699188429 | 0.707251092 | -3.289742421 | 1002.3212 | 1455.61714  | 21.6  |
| Sequence 13 | 0.282818 | 0.000029 | 0.000635  | 0.000017  | 0.01493  | 0.0003   | 1.467386 | 0.000062 | 0.282816885 | 94   | 1.166964302  | 1.025514083 | 3.21525848   | 609.225   | 923.0781946 | 21.5  |
| Sequence 14 | 0.282793 | 0.00002  | 0.000579  | 0.00001   | 0.01304  | 0.00027  | 1.467336 | 0.00004  | 0.282791994 | 93   | 0.282900437  | 0.707251092 | 2.312640359  | 643.32162 | 979.6802477 | 17.2  |
| Sequence 15 | 0.282577 | 0.000017 | 0.000724  | 0.000018  | 0.01675  | 0.00045  | 1.467256 | 0.00004  | 0.282573396 | 266  | -7.355411355 | 0.601163428 | -1.568354006 | 948.32163 | 1360.366941 | 21.04 |
| Sequence 16 | 0.281948 | 0.000028 | 0.0008902 | 0.000007  | 0.02257  | 0.0002   | 1.467315 | 0.000052 | 0.281920493 | 1630 | -29.59845819 | 0.990151529 | 6.166147414  | 1827.6428 | 1946.466597 | 19.6  |
| Sequence 17 | 0.282558 | 0.000026 | 0.000945  | 0.000023  | 0.02535  | 0.00064  | 1.467345 | 0.000036 | 0.282556181 | 103  | -8.027299892 | 0.919426419 | -5.80586809  | 980.55197 | 1500.816295 | 17.9  |
| Sequence 18 | 0.282838 | 0.000022 | 0.00098   | 0.000015  | 0.02204  | 0.00034  | 1.467313 | 0.000034 | 0.28283626  | 95   | 1.874215393  | 0.777976201 | 3.922810633  | 586.50158 | 878.8362187 | 18    |
| Sequence 21 | 0.282686 | 0.00002  | 0.000745  | 0.000026  | 0.01765  | 0.00073  | 1.467296 | 0.000032 | 0.282684677 | 95   | -3.500892905 | 0.707251092 | -1.438676091 | 796.30566 | 1219.075036 | 21.5  |
| Sequence 22 | 0.282892 | 0.00002  | 0.00131   | 0.000027  | 0.02958  | 0.00069  | 1.467331 | 0.00004  | 0.28288965  | 96   | 3.783793341  | 0.707251092 | 5.833444837  | 514.51058 | 757.8494735 | 17.8  |
| Sequence 23 | 0.282869 | 0.000019 | 0.000718  | 0.000013  | 0.01858  | 0.00037  | 1.467303 | 0.000029 | 0.282867699 | 97   | 2.970454586  | 0.671888537 | 5.079260285  | 538.84064 | 806.7341903 | 18.74 |
| Sequence 24 | 0.282818 | 0.000024 | 0.000667  | 0.000022  | 0.01626  | 0.00057  | 1.467378 | 0.000048 | 0.282816805 | 95.9 | 1.166964302  | 0.84870131  | 3.254677745  | 609.73873 | 922.058711  | 17.9  |
| Sequence 25 | 0.282834 | 0.000019 | 0.000923  | 0.000031  | 0.02235  | 0.00078  | 1.467255 | 0.000036 | 0.282832379 | 94   | 1.732765175  | 0.671888537 | 3.763284591  | 591.26872 | 888.2072602 | 18.14 |
| Sequence 26 | 0.282892 | 0.000027 | 0.001017  | 0.000056  | 0.0239   | 0.0013   | 1.467265 | 0.000056 | 0.282890208 | 94.3 | 3.783793341  | 0.954788974 | 5.81537103   | 510.49711 | 757.6666149 | 23.57 |
| Sequence 27 | 0.282735 | 0.000029 | 0.00085   | 0.000011  | 0.01938  | 0.00021  | 1.467351 | 0.000048 | 0.282733513 | 93.6 | -1.76812773  | 1.025514083 | 0.257530157  | 729.61149 | 1110.575739 | 15.9  |
| Sequence 28 | 0.282413 | 0.000021 | 0.001531  | 0.000037  | 0.02879  | 0.00091  | 1.467352 | 0.000037 | 0.282405665 | 256  | -13.15487031 | 0.742613646 | -7.726119559 | 1202.3644 | 1739.602733 | 19.8  |
| Sequence 29 | 0.282841 | 0.000018 | 0.0006821 | 0.0000078 | 0.01531  | 0.00021  | 1.467331 | 0.000037 | 0.282839804 | 93.8 | 1.980303057  | 0.636525983 | 4.021483863  | 577.68007 | 871.6133576 | 21.6  |
| Sequence 30 | 0.281999 | 0.000024 | 0.000763  | 0.000011  | 0.02187  | 0.0004   | 1.46732  | 0.000036 | 0.281980167 | 1306 | -27.79496791 | 0.84870131  | 0.869156824  | 1751.3718 | 2020.543353 | 17.8  |
| Sequence 31 | 0.282824 | 0.00002  | 0.000734  | 0.000013  | 0.01729  | 0.00032  | 1.4673   | 0.000033 | 0.282822697 | 95   | 1.379139629  | 0.707251092 | 3.443076686  | 602.38112 | 909.3682286 | 20.2  |
| Sequence 32 | 0.282531 | 0.000035 | 0.00255   | 0.00011   | 0.0657   | 0.003    | 1.467274 | 0.000058 | 0.282522989 | 168  | -8.982088866 | 1.237689411 | -5.534782215 | 1063.5951 | 1534.063663 | 18.34 |
| Sequence 33 | 0.282671 | 0.000015 | 0.000983  | 0.000015  | 0.02295  | 0.00032  | 1.467341 | 0.000031 | 0.282669089 | 104  | -4.031331223 | 0.530438319 | -1.789995508 | 822.48229 | 1248.294659 | 22.1  |
| Sequence 34 | 0.282647 | 0.000018 | 0.00057   | 0.00002   | 0.01382  | 0.00048  | 1.46735  | 0.00004  | 0.282645988 | 95   | -4.880032534 | 0.636525983 | -2.807118485 | 847.02876 | 1305.570988 | 18.4  |
| Sequence 35 | 0.282835 | 0.000022 | 0.000848  | 0.000023  | 0.02089  | 0.00059  | 1.467328 | 0.000033 | 0.282833431 | 99   | 1.76812773   | 0.777976201 | 3.911692627  | 588.68357 | 882.6795006 | 21.8  |
| Sequence 36 | 0.28297  | 0.000027 | 0.001857  | 0.000058  | 0.0485   | 0.0016   | 1.467313 | 0.000045 | 0.282966495 | 101  | 6.542072599  | 0.954788974 | 8.662702434  | 408.83774 | 580.9671419 | 19.7  |
| Sequence 37 | 0.282188 | 0.000024 | 0.000934  | 0.000037  | 0.0246   | 0.001    | 1.467338 | 0.000037 | 0.282167035 | 1189 | -21.11144509 | 0.84870131  | 4.830993792  | 1497.1288 | 1681.499016 | 17.5  |
| Sequence 42 | 0.282671 | 0.000024 | 0.000696  | 0.000017  | 0.01567  | 0.00038  | 1.467368 | 0.000064 | 0.282669764 | 95   | -4.031331223 | 0.84870131  | -1.966149623 | 816.26908 | 1252.431915 | 19.1  |
| Sequence 43 | 0.282768 | 0.000027 | 0.000764  | 0.00005   | 0.0176   | 0.0011   | 1.46747  | 0.000066 | 0.282766675 | 92.8 | -0.601163428 | 0.954788974 | 1.412677789  | 681.60538 | 1036.679204 | 18.5  |
| Sequence 44 | 0.282798 | 0.000017 | 0.000553  | 0.000034  | 0.01475  | 0.00098  | 1.467287 | 0.000032 | 0.282797008 | 96   | 0.45971321   | 0.601163428 | 2.556688711  | 635.89018 | 966.5178485 | 19.64 |
| Sequence 45 | 0.282818 | 0.000028 | 0.001334  | 0.000028  | 0.02874  | 0.00064  | 1.467322 | 0.000058 | 0.282815732 | 91   | 1.166964302  | 0.990151529 | 3.107778568  | 620.64761 | 927.5654933 | 22.2  |
| Sequence 46 | 0.28281  | 0.000022 | 0.0004733 | 0.0000081 | 0.0107   | 0.00017  | 1.467421 | 0.000037 | 0.282809147 | 96.5 | 0.884063865  | 0.777976201 | 2.997147683  | 617.8181  | 938.9075038 | 17.7  |
| Sequence 47 | 0.282802 | 0.000026 | 0.000466  | 0.000012  | 0.01162  | 0.00036  | 1.467348 | 0.000044 | 0.28280112  | 101  | 0.601163428  | 0.919426419 | 2.813323782  | 628.85871 | 954.1177866 | 17.1  |
| Sequence 48 | 0.282811 | 0.000033 | 0.0008261 | 0.0000084 | 0.01953  | 0.00025  | 1.467314 | 0.000049 | 0.282809518 | 96   | 0.919426419  | 1.166964302 | 2.999171361  | 622.17008 | 938.387371  | 20.71 |
| Sequence 49 | 0.282544 | 0.000036 | 0.0006355 | 0.0000065 | 0.01637  | 0.00019  | 1.467358 | 0.000056 | 0.28254286  | 96   | -8.522375656 | 1.273051965 | -6.432549844 | 992.08387 | 1534.825741 | 17.7  |
| Sequence 50 | 0.282822 | 0.000015 | 0.0005318 | 0.0000059 | 0.01197  | 0.00016  | 1.46728  | 0.00003  | 0.282821036 | 97   | 1.30841452   | 0.530438319 | 3.428800035  | 601.9799  | 911.843285  | 22.6  |
| Sequence 51 | 0.282865 | 0.00002  | 0.000932  | 0.000015  | 0.02037  | 0.00034  | 1.467301 | 0.000032 | 0.282863241 | 101  | 2.829004367  | 0.707251092 | 5.010554301  | 547.56302 | 814.2540714 | 21.1  |
| Sequence 53 | 0.282314 | 0.00002  | 0.000597  | 0.0000033 | 0.01564  | 0.00096  | 1.467336 | 0.000048 | 0.282302272 | 1042 | -16.65576321 | 0.742613646 | 6.285544776  | 1310.0364 | 1474.511864 | 20.8  |
| Sequence 54 | 0.282679 | 0.000031 | 0.000663  | 0.000024  | 0.01636  | 0.00064  | 1.467377 | 0.000063 | 0.282676383 | 211  | -3.724843078 | 1.096239192 | 0.84934486   | 804.37633 | 1164.712262 | 16.9  |

|             | 176Hf/177Hf<br>fstnorm | 176Hf/177Hf<br>orr 2SE | 176Lu/177Hf<br>orr | 176Lu/177Hf<br>r 2SE | 176Yb/177Hf<br>orr | 176Yb/177Hf<br>r 2SE | 178Hf/177Hf<br>2SE | 176Hf/177Hf<br>t (age, Ma) | εHf(0)      | ±2 sigma | εHf(t)       | TDM         | TDM C*       | TotalHfBe<br>am (V) |             |       |
|-------------|------------------------|------------------------|--------------------|----------------------|--------------------|----------------------|--------------------|----------------------------|-------------|----------|--------------|-------------|--------------|---------------------|-------------|-------|
| Sequence 55 | 0.282826               | 0.000029               | 0.000909           | 0.000037             | 0.0233             | 0.0011               | 1.467349           | 0.000064                   | 0.282824352 | 97       | 1.449864738  | 1.025514083 | 3.546097277  | 602.35179           | 904.3800481 | 21.3  |
| Sequence 56 | 0.282946               | 0.000049               | 0.0008741          | 0.0000045            | 0.019              | 0.00014              | 1.467287           | 0.000087                   | 0.282944432 | 96       | 5.69371289   | 1.732765175 | 7.771088353  | 432.16036           | 634.0740717 | 20.1  |
| Sequence 57 | 0.282831               | 0.000022               | 0.00156            | 0.000043             | 0.0375             | 0.001                | 1.467289           | 0.000039                   | 0.282828172 | 97       | 1.626677511  | 0.777976201 | 3.681210534  | 605.74799           | 895.7819479 | 24.6  |
| Sequence 58 | 0.282578               | 0.000015               | 0.0010508          | 0.0000054            | 0.02658            | 0.00013              | 1.467282           | 0.000031                   | 0.282575506 | 127      | -7.3200488   | 0.530438319 | -4.588926245 | 955.13693           | 1442.782253 | 25.6  |
| Sequence 61 | 0.282214               | 0.000027               | 0.0013577          | 0.0000065            | 0.03644            | 0.00016              | 1.467328           | 0.000043                   | 0.282185311 | 1120     | -20.19201867 | 0.954788974 | 3.910224719  | 1477.4538           | 1684.755434 | 20.8  |
| Sequence 62 | 0.282471               | 0.000024               | 0.0010059          | 0.0000099            | 0.02236            | 0.00026              | 1.4674             | 0.000044                   | 0.282465973 | 267      | -11.10384214 | 0.84870131  | -5.347035307 | 1104.3461           | 1598.926769 | 19.4  |
| Sequence 63 | 0.282404               | 0.000023               | 0.002104           | 0.000014             | 0.05735            | 0.00037              | 1.467353           | 0.000049                   | 0.282382323 | 549      | -13.4731333  | 0.813338756 | -2.000830297 | 1234.1115           | 1607.971802 | 17.8  |
| Sequence 64 | 0.282841               | 0.000015               | 0.000082           | 0.000043             | 0.0213             | 0.0013               | 1.467294           | 0.000033                   | 0.282839498 | 98       | 1.980303057  | 0.530438319 | 4.104051125  | 579.78844           | 869.6491203 | 22.8  |
| Sequence 65 | 0.282411               | 0.000022               | 0.001205           | 0.000016             | 0.02991            | 0.00044              | 1.467248           | 0.000033                   | 0.282407372 | 161      | -13.22559542 | 0.777976201 | -9.780478979 | 1194.7591           | 1794.972023 | 22.3  |
| Sequence 66 | 0.282696               | 0.000013               | 0.0004509          | 0.0000062            | 0.01014            | 0.00015              | 1.467299           | 0.000028                   | 0.282695225 | 92       | -3.147267359 | 0.45971321  | -1.132287517 | 776.27045           | 1197.354353 | 23.7  |
| Sequence 67 | 0.282809               | 0.00002                | 0.0007682          | 0.0000082            | 0.01733            | 0.00018              | 1.467344           | 0.000039                   | 0.282807616 | 96.4     | 0.84870131   | 0.707251092 | 2.940795531  | 624.03207           | 942.4125456 | 17    |
| Sequence 68 | 0.282857               | 0.000019               | 0.000888           | 0.000025             | 0.02161            | 0.00065              | 1.467296           | 0.00003                    | 0.282855291 | 103      | 2.546103931  | 0.671888537 | 4.773835274  | 558.22966           | 830.9095111 | 18.98 |
| Sequence 69 | 0.282197               | 0.000021               | 0.0003795          | 0.0000034            | 0.00977            | 0.00011              | 1.467308           | 0.000037                   | 0.282189776 | 1010     | -20.7931821  | 0.742613646 | 1.572681785  | 1463.2566           | 1744.52008  | 22.1  |
| Sequence 70 | 0.282814               | 0.000024               | 0.000655           | 0.000047             | 0.0152             | 0.0012               | 1.467338           | 0.000042                   | 0.282812825 | 96       | 1.025514083  | 0.84870131  | 3.116138172  | 615.15764           | 930.9488308 | 18.99 |
| Sequence 71 | 0.282799               | 0.000025               | 0.000647           | 0.000017             | 0.01507            | 0.0004               | 1.467316           | 0.000051                   | 0.282797755 | 103      | 0.495075764  | 0.884063865 | 2.738746047  | 636.0621            | 960.4238612 | 20.8  |
| Sequence 72 | 0.282969               | 0.000019               | 0.000949           | 0.000017             | 0.02004            | 0.00046              | 1.467297           | 0.000035                   | 0.282966836 | 122      | 6.506710045  | 0.671888537 | 9.142114951  | 400.38184           | 566.8492036 | 20.4  |
| Sequence 73 | 0.282359               | 0.000045               | 0.001486           | 0.00002              | 0.03806            | 0.00062              | 1.46736            | 0.000072                   | 0.282345427 | 487      | -15.06444826 | 1.591314957 | -4.696956538 | 1277.4765           | 1728.735109 | 21.8  |
| Sequence 74 | 0.281833               | 0.000043               | 0.001287           | 0.000047             | 0.02924            | 0.00095              | 1.46737            | 0.000076                   | 0.281793876 | 1604     | -33.66515197 | 1.520589847 | 1.075440747  | 2006.9548           | 2241.695458 | 24.5  |
| Sequence 75 | 0.282184               | 0.000022               | 0.000851           | 0.000031             | 0.02124            | 0.0008               | 1.467287           | 0.000027                   | 0.282158817 | 1562     | -21.25289531 | 0.777976201 | 13.06310412  | 1499.4138           | 1461.535009 | 13.2  |
| Sequence 76 | 0.282151               | 0.000023               | 0.000516           | 0.000014             | 0.01328            | 0.00036              | 1.467328           | 0.000035                   | 0.282139673 | 1163     | -22.41985961 | 0.813338756 | 3.269504495  | 1531.6976           | 1758.646815 | 15.4  |
| Sequence 77 | 0.282689               | 0.000022               | 0.000784           | 0.000011             | 0.0186             | 0.00025              | 1.467317           | 0.000035                   | 0.282687535 | 100      | -3.394805241 | 0.777976201 | -1.22647949  | 792.91635           | 1209.542055 | 18.8  |
| Sequence 82 | 0.282515               | 0.000025               | 0.000906           | 0.000017             | 0.0216             | 0.00043              | 1.467439           | 0.000052                   | 0.282513304 | 100.2    | -9.54788974  | 0.884063865 | -7.38467172  | 1039.8216           | 1597.910148 | 17.8  |
| Sequence 83 | 0.28161                | 0.000021               | 0.0002927          | 0.0000038            | 0.00821            | 0.00016              | 1.467343           | 0.000058                   | 0.281600967 | 1628     | -41.55100164 | 0.742613646 | -5.220629037 | 2256.8853           | 2648.404701 | 23.8  |
| MP-6_1      | 0.281931               | 0.000021               | 0.001093           | 0.00004              | 0.0287             | 0.0012               | 1.467368           | 0.000049                   | 0.281896742 | 1653     | -30.19962162 | 0.742613646 | 5.851519314  | 1860.9881           | 1984.217288 | 21.3  |

**Z12-02**  
**La Pimentia Fm.**

|             |          |          |           |           |         |         |          |          |             |       |              |             |              |           |             |       |
|-------------|----------|----------|-----------|-----------|---------|---------|----------|----------|-------------|-------|--------------|-------------|--------------|-----------|-------------|-------|
| Sequence 5  | 0.282569 | 0.000036 | 0.002218  | 0.000037  | 0.0575  | 0.001   | 1.467275 | 0.000033 | 0.282561675 | 176.6 | -7.638311792 | 1.273051965 | -3.974859352 | 998.7456  | 1442.560965 | 19.6  |
| Sequence 6  | 0.282715 | 0.000026 | 0.0010119 | 0.0000091 | 0.02407 | 0.00027 | 1.467235 | 0.000025 | 0.282712145 | 150.9 | -2.475378821 | 0.919426419 | 0.776114705  | 761.00445 | 1122.422555 | 18.13 |
| Sequence 7  | 0.282159 | 0.000023 | 0.000806  | 0.000012  | 0.02025 | 0.00031 | 1.46726  | 0.000035 | 0.282155167 | 254.1 | -22.13695917 | 0.813338756 | -16.63171127 | 1532.2691 | 2292.977226 | 15.86 |
| Sequence 8  | 0.282587 | 0.000024 | 0.0007842 | 0.0000096 | 0.01904 | 0.00021 | 1.467233 | 0.000031 | 0.282571923 | 1020  | -7.001785809 | 0.84870131  | 15.34395049  | 935.8352  | 884.6393562 | 15.31 |
| Sequence 9  | 0.282591 | 0.000033 | 0.001603  | 0.000068  | 0.041   | 0.0019  | 1.467288 | 0.000028 | 0.28258582  | 172.8 | -6.860335591 | 1.166964302 | -3.205267344 | 950.75472 | 1391.11627  | 15.6  |
| Sequence 10 | 0.282635 | 0.000022 | 0.001008  | 0.000044  | 0.0245  | 0.0011  | 1.467271 | 0.000027 | 0.282631782 | 170.7 | -5.304383189 | 0.777976201 | -1.626042945 | 873.78551 | 1289.827358 | 16.94 |
| Sequence 11 | 0.282783 | 0.000028 | 0.001485  | 0.000015  | 0.03567 | 0.00045 | 1.467266 | 0.000032 | 0.282778413 | 165.2 | -0.070725109 | 0.990151529 | 3.43868258   | 673.34401 | 964.6483918 | 15.09 |
| Sequence 12 | 0.28268  | 0.000024 | 0.000874  | 0.000021  | 0.0219  | 0.00048 | 1.467224 | 0.000028 | 0.282677161 | 173.7 | -3.713068232 | 0.84870131  | 0.046060006  | 807.45922 | 1186.445472 | 16.09 |
| Sequence 13 | 0.282463 | 0.00003  | 0.0009581 | 0.0000061 | 0.02362 | 0.0002  | 1.467267 | 0.000036 | 0.282459821 | 177.4 | -11.38674258 | 1.060876638 | -7.560272782 | 1114.1605 | 1668.526908 | 16.27 |
| Sequence 14 | 0.282585 | 0.000028 | 0.001275  | 0.000039  | 0.0325  | 0.0011  | 1.467311 | 0.000029 | 0.282580684 | 181   | -0.772510918 | 0.990151529 | -3.204440403 | 950.93306 | 1397.431928 | 18.2  |
| Sequence 15 | 0.28257  | 0.000037 | 0.001362  | 0.000019  | 0.03506 | 0.00049 | 1.467251 | 0.000045 | 0.282565749 | 166.9 | -7.602949237 | 1.30841452  | -4.046587053 | 974.45214 | 1439.554594 | 12.89 |
| Sequence 16 | 0.282565 | 0.000023 | 0.00116   | 0.000084  | 0.0291  | 0.0022  | 1.46725  | 0.000028 | 0.282561204 | 175   | -7.77976201  | 0.813338756 | -4.027135671 | 976.27599 | 1444.612323 | 16.4  |
| Sequence 17 | 0.282602 | 0.000025 | 0.002041  | 0.000068  | 0.0531  | 0.0017  | 1.467226 | 0.000023 | 0.282595493 | 170.5 | -6.47134749  | 0.884063865 | -2.91427916  | 946.18735 | 1370.981058 | 20.2  |
| Sequence 18 | 0.282129 | 0.000016 | 0.000126  | 0.00002   | 0.00298 | 0.00039 | 1.467275 | 0.000028 | 0.28212862  | 161.5 | -23.19783581 | 0.565800873 | -19.63031588 | 1546.2287 | 2408.166132 | 21.6  |
| Sequence 19 | 0.282725 | 0.00004  | 0.001416  | 0.000052  | 0.0346  | 0.0013  | 1.467223 | 0.000037 | 0.282705569 | 730   | -2.121753275 | 1.414502184 | 13.5178662   | 754.98219 | 769.4793286 | 8.86  |
| Sequence 20 | 0.282587 | 0.000025 | 0.0011577 | 0.0000058 | 0.03076 | 0.00025 | 1.467219 | 0.000025 | 0.28258325  | 173.2 | -7.001785809 | 0.884063865 | -3.287272194 | 945.13829 | 1396.596591 | 15.63 |
| Sequence 21 | 0.282718 | 0.000029 | 0.001323  | 0.000046  | 0.03042 | 0.00092 | 1.467235 | 0.000033 | 0.282713623 | 176.9 | -2.369291158 | 1.025514083 | 1.407212707  | 763.07189 | 1102.734665 | 15.2  |
| Sequence 22 | 0.282303 | 0.000024 | 0.000446  | 0.000014  | 0.01174 | 0.00042 | 1.467287 | 0.00003  | 0.282300846 | 258   | -17.04475131 | 0.84870131  | -11.39032751 | 1320.0352 | 1970.118043 | 16.25 |
| Sequence 23 | 0.282569 | 0.000019 | 0.001093  | 0.000018  | 0.02732 | 0.00046 | 1.467246 | 0.000029 | 0.2825505   | 899   | -7.638311792 | 0.671888537 | 11.84243398  | 968.89897 | 1010.397888 | 15.8  |
| Sequence 24 | 0.282538 | 0.000023 | 0.000966  | 0.000024  | 0.02417 | 0.00064 | 1.467257 | 0.000027 | 0.282534916 | 170.7 | -8.734550984 | 0.813338756 | -5.052769485 | 1009.187  | 1505.838713 | 14.64 |
| Sequence 25 | 0.282587 | 0.000026 | 0.001131  | 0.000013  | 0.03064 | 0.00044 | 1.467256 | 0.000027 | 0.28258156  | 257   | -7.001785809 | 0.919426419 | -1.48017505  | 944.46712 | 1347.797497 | 18.3  |
| Sequence 26 | 0.282549 | 0.000021 | 0.00091   | 0.000012  | 0.02271 | 0.00038 | 1.467256 | 0.000032 | 0.282544929 | 239.1 | -8.345562883 | 0.742613646 | -3.175326659 | 992.26861 | 1440.722831 | 15.74 |
| Sequence 27 | 0.282228 | 0.000028 | 0.0002109 | 0.0000034 | 0.00572 | 0.00012 | 1.467245 | 0.000033 | 0.282223785 | 1060  | -19.69694291 | 0.990151529 | 3.911858052  | 1414.5547 | 1637.433353 | 15.5  |
| Sequence 28 | 0.282608 | 0.000033 | 0.00311   | 0.000028  | 0.0829  | 0.0078  | 1.46723  | 0.000029 | 0.282596669 | 194.8 | -6.259172163 | 1.166964302 | -2.331703727 | 965.6468  | 1353.119294 | 12.77 |
| Sequence 29 | 0.282166 | 0.000028 | 0.000786  | 0.000029  | 0.01929 | 0.00095 | 1.467279 | 0.000037 | 0.282147441 | 1250  | -21.88942129 | 0.990151529 | 5.525076475  | 1521.7781 | 1686.195175 | 15    |
| Sequence 30 | 0.282543 | 0.000039 | 0.001477  | 0.000021  | 0.03625 | 0.00057 | 1.467295 | 0.000041 | 0.282534582 | 304.4 | -8.557738211 | 1.379139629 | -2.084991164 | 1015.9047 | 1422.819002 | 14.38 |
| Sequence 31 | 0.282751 | 0.000022 | 0.000927  | 0.000011  | 0.01988 | 0.00027 | 1.467262 | 0.000028 | 0.282746573 | 255.2 | -1.202326856 | 0.777976201 | 4.318262917  | 708.53629 | 979.3410904 | 18.7  |
| Sequence 32 | 0.282369 | 0.000025 | 0.000724  | 0.000013  | 0.01881 | 0.00041 | 1.467251 | 0.000028 | 0.282354943 | 1030  | -14.71082271 | 0.884063865 | 7.880217554  | 1238.0492 | 1364.581258 | 17.9  |
| Sequence 33 | 0.282173 | 0.000032 | 0.001179  | 0.000032  | 0.02769 | 0.00071 | 1.467268 | 0.000036 | 0.282146738 | 1180  | -21.64188341 | 1.131601747 | 3.906582287  | 1527.8285 | 1732.214145 | 17    |
| Sequence 34 | 0.282332 | 0.000023 | 0.001645  | 0.00001   | 0.03916 | 0.00032 | 1.467276 | 0.000029 | 0.282301062 | 998   | -16.01923723 | 0.813338756 | 5.244963881  | 1321.3383 | 1505.004942 | 17.2  |
| Sequence 35 | 0.282087 | 0.000023 | 0.000194  | 0.000029  | 0.00387 | 0.00054 | 1.46722  | 0.00003  | 0.282083495 | 959   | -24.6830631  | 0.813338756 | -3.34876059  | 1606.1132 | 2011.562446 | 16.55 |
| Sequence 36 | 0.282158 | 0.000021 | 0.0005387 | 0.000008  | 0.01354 | 0.00021 | 1.467268 | 0.000029 | 0.282146514 | 1130  | -22.17232173 | 0.742613646 | 2.761993124  | 1522.9786 | 1764.407368 | 14.57 |
| Sequence 37 | 0.282627 | 0.000021 | 0.000745  | 0.000024  | 0.01768 | 0.00058 | 1.467231 | 0.000027 | 0.282624516 | 178.3 | -5.587283625 | 0.742613646 | -1.713925191 | 878.92721 | 1301.291872 | 20.1  |
| Sequence 38 | 0.282228 | 0.000023 | 0.0005148 | 0.0000059 | 0.01375 | 0.00017 | 1.46727  | 0.000031 | 0.282217711 | 1060  | -19.69694291 | 0.813338756 | 3.69654934   | 1425.752  | 1650.916577 | 16.32 |
| Sequence 39 | 0.282596 | 0.000021 | 0.0007452 | 0.0000054 | 0.01954 | 0.00019 | 1.467244 | 0.000026 | 0.282591866 | 296.3 | -6.683522818 | 0.742613646 | -0.238720206 | 922.29238 | 1300.078869 | 16.21 |
| Sequence 40 | 0.282493 | 0.000019 | 0.0006417 | 0.000005  | 0.01704 | 0.00015 | 1.467266 | 0.000028 | 0.282487797 | 416   | -10.32586594 | 0.671888537 | -1.239738948 | 1063.2162 | 1456.512421 | 19.5  |

|             | 176Hf/177Hf<br>fstnorm | 176Hf/177Hf<br>corr 2SE | 176Lu/177Hf<br>corr | 176Lu/177Hf<br>corr 2SE | 176Yb/177Hf<br>corr | 176Yb/177Hf<br>corr 2SE | 178Hf/177Hf | 178Hf/177Hf<br>2SE | 176Hf/177Hf | t (age,<br>Ma) | εHf(0)       | ±2 sigma    | εHf(t)       | TDM       | TDM C*      | TotalHfBe<br>am (V) |
|-------------|------------------------|-------------------------|---------------------|-------------------------|---------------------|-------------------------|-------------|--------------------|-------------|----------------|--------------|-------------|--------------|-----------|-------------|---------------------|
| Sequence 41 | 0.282552               | 0.000022                | 0.000665            | 0.000028                | 0.01674             | 0.00073                 | 1.467252    | 0.000029           | 0.282546389 | 450            | -8.23947522  | 0.777976201 | 1.588275571  | 981.70433 | 1304.841941 | 16.94               |
| Sequence 42 | 0.282522               | 0.000034                | 0.000828            | 0.000043                | 0.0222              | 0.0014                  | 1.467291    | 0.000045           | 0.282514531 | 481            | -9.300351857 | 1.202326856 | 1.155005882  | 1027.8952 | 1356.422599 | 11.5                |
| Sequence 43 | 0.282304               | 0.00002                 | 0.001478            | 0.000035                | 0.03513             | 0.0009                  | 1.467225    | 0.000026           | 0.282290361 | 492            | -17.00938876 | 0.707251092 | -6.53436903  | 1055.0535 | 1847.513009 | 20.5                |
| Sequence 44 | 0.282378               | 0.000022                | 0.001799            | 0.000049                | 0.0434              | 0.0013                  | 1.467245    | 0.000026           | 0.282361772 | 481            | -14.39255972 | 0.777976201 | -4.252742747 | 1261.12   | 1696.259259 | 19.2                |
| Sequence 45 | 0.282337               | 0.000026                | 0.000902            | 0.000013                | 0.02287             | 0.00028                 | 1.467313    | 0.000033           | 0.282326856 | 599            | -15.84242446 | 0.919426419 | -2.8425314   | 1288.4991 | 1699.663105 | 17.41               |
| Sequence 46 | 0.282833               | 0.000021                | 0.000803            | 0.000012                | 0.01828             | 0.00027                 | 1.467259    | 0.000028           | 0.282828475 | 301            | 1.69740262   | 0.742613646 | 8.238880055  | 590.80091 | 765.8646377 | 17.45               |
| Sequence 47 | 0.28222                | 0.000031                | 0.0002583           | 0.0000083               | 0.00673             | 0.00027                 | 1.467265    | 0.00003            | 0.282214443 | 1140           | -19.97984334 | 1.096239192 | 5.397527073  | 1427.2295 | 1607.392808 | 14.6                |
| Sequence 48 | 0.281935               | 0.000029                | 0.001152            | 0.00003                 | 0.02941             | 0.0008                  | 1.467302    | 0.000033           | 0.281915567 | 896            | -30.0581714  | 1.025514083 | -10.72340406 | 1858.3297 | 2419.792863 | 20.9                |
| Sequence 49 | 0.28263                | 0.000029                | 0.001884            | 0.000045                | 0.04676             | 0.00099                 | 1.467256    | 0.000032           | 0.282616374 | 386            | -5.481195962 | 1.025514083 | 2.632909003  | 901.78515 | 1188.731805 | 16.65               |
| Sequence 50 | 0.282587               | 0.000031                | 0.001973            | 0.000074                | 0.0507              | 0.002                   | 1.467257    | 0.000035           | 0.282580979 | 163.2          | -7.001785809 | 1.096239192 | -3.590153421 | 966.1025  | 1407.925077 | 14.31               |
| Sequence 51 | 0.282664               | 0.000019                | 0.000562            | 0.000019                | 0.01205             | 0.00047                 | 1.467248    | 0.000029           | 0.282660916 | 293.1          | -4.278869106 | 0.671888537 | 2.13323459   | 823.15885 | 1147.612052 | 17.7                |

## Z12-04

### Zacatecas Fm.

|             |          |          |           |           |         |         |          |          |             |       |               |             |              |           |             |       |
|-------------|----------|----------|-----------|-----------|---------|---------|----------|----------|-------------|-------|---------------|-------------|--------------|-----------|-------------|-------|
| Z12-04      | 0.281004 | 0.000022 | 0.00076   | 0.000033  | 0.01889 | 0.00078 | 1.467259 | 0.00003  | 0.280969439 | 2382  | -62.98070973  | 0.777976201 | -10.22481059 | 3104.3423 | 3539.200634 | 18.2  |
| Sequence 58 | 0.282803 | 0.000025 | 0.00057   | 0.00001   | 0.01306 | 0.00036 | 1.467248 | 0.00003  | 0.28279983  | 297.1 | 0.636525983   | 0.884063865 | 7.138114137  | 629.17809 | 832.938015  | 19.1  |
| Sequence 59 | 0.282325 | 0.000028 | 0.001512  | 0.000045  | 0.0366  | 0.0015  | 1.467277 | 0.000043 | 0.282311329 | 482.1 | -16.26677511  | 0.990151529 | -6.013794714 | 1326.5487 | 1807.316505 | 17.3  |
| Sequence 60 | 0.282826 | 0.000034 | 0.001101  | 0.000023  | 0.02659 | 0.0008  | 1.467289 | 0.000042 | 0.282820742 | 255.2 | 1.449864738   | 1.202326856 | 6.942556879  | 605.435   | 812.3866144 | 15.6  |
| Sequence 61 | 0.282864 | 0.000026 | 0.000922  | 0.00001   | 0.02026 | 0.00047 | 1.467286 | 0.000036 | 0.282859436 | 264.5 | 2.793641813   | 0.919426419 | 8.519256442  | 548.83227 | 719.1689918 | 14.4  |
| Sequence 62 | 0.282601 | 0.000029 | 0.001918  | 0.000092  | 0.0478  | 0.0024  | 1.467278 | 0.000032 | 0.28259031  | 297.7 | -6.506710045  | 1.025514083 | -0.26253949  | 944.4677  | 1302.674753 | 13.07 |
| Sequence 63 | 0.282141 | 0.000041 | 0.000606  | 0.000012  | 0.01504 | 0.00026 | 1.467281 | 0.000042 | 0.282126888 | 1233  | -22.77348516  | 1.449864738 | 4.409008298  | 1549.0631 | 1742.560042 | 19.07 |
| Sequence 64 | 0.282676 | 0.000053 | 0.000893  | 0.000019  | 0.02203 | 0.00061 | 1.467236 | 0.000064 | 0.28267136  | 277.6 | -3.85451845   | 1.874215393 | 2.156807156  | 813.49158 | 1133.989335 | 8.04  |
| Sequence 65 | 0.282317 | 0.000041 | 0.001967  | 0.000038  | 0.05    | 0.0011  | 1.467219 | 0.000041 | 0.28229949  | 474.7 | -16.54967555  | 1.449864738 | -6.598623863 | 1354.3783 | 1838.136399 | 12.9  |
| Sequence 66 | 0.282595 | 0.000042 | 0.00183   | 0.000011  | 0.0468  | 0.003   | 1.467259 | 0.000038 | 0.282585834 | 267.6 | -6.718885372  | 1.485227293 | -1.092539483 | 950.84876 | 1331.596397 | 15.22 |
| Sequence 67 | 0.282658 | 0.000042 | 0.00283   | 0.00012   | 0.0739  | 0.0041  | 1.467264 | 0.000049 | 0.282643061 | 282   | -4.491044433  | 1.485227293 | 1.253661091  | 884.10593 | 1194.597286 | 18.3  |
| Sequence 68 | 0.282266 | 0.000029 | 0.0002622 | 0.0000055 | 0.00673 | 0.00015 | 1.467232 | 0.000036 | 0.282260779 | 1056  | -18.35316583  | 1.025514083 | 5.132431045  | 1364.4317 | 1557.780702 | 11.49 |
| Sequence 69 | 0.281735 | 0.00003  | 0.000824  | 0.000012  | 0.02023 | 0.00036 | 1.467281 | 0.000031 | 0.281706631 | 1813  | -37.13068232  | 1.060876638 | 2.784354644  | 2117.1244 | 2300.530176 | 15.4  |
| Sequence 70 | 0.28223  | 0.00006  | 0.00356   | 0.00036   | 0.099   | 0.012   | 1.467281 | 0.000074 | 0.282139677 | 1342  | -19.6262178   | 2.121753275 | 7.348021106  | 1545.5981 | 1644.85396  | 10.33 |
| Sequence 71 | 0.282597 | 0.000044 | 0.002702  | 0.000057  | 0.0696  | 0.0016  | 1.467223 | 0.000043 | 0.282584496 | 247.3 | -6.648160263  | 1.555952402 | -1.592589564 | 970.91854 | 1347.337092 | 15.06 |
| Sequence 72 | 0.282158 | 0.000027 | 0.001524  | 0.000062  | 0.0404  | 0.0015  | 1.467262 | 0.000029 | 0.282129946 | 977   | -22.17232173  | 0.954788974 | -1.295196046 | 1563.0834 | 1877.191866 | 22.06 |
| Sequence 73 | 0.282221 | 0.000022 | 0.001205  | 0.000046  | 0.028   | 0.0012  | 1.467283 | 0.000028 | 0.282203803 | 759   | -19.94448079  | 0.777976201 | -3.601692075 | 1461.6629 | 1871.625502 | 20.6  |
| Sequence 74 | 0.282459 | 0.00002  | 0.001011  | 0.000029  | 0.02232 | 0.00065 | 1.467275 | 0.000025 | 0.282450112 | 468.8 | -11.5281928   | 0.707251092 | -1.398741583 | 1121.3323 | 1507.666303 | 19.42 |
| Sequence 75 | 0.282166 | 0.00003  | 0.00173   | 0.00006   | 0.0424  | 0.0014  | 1.467255 | 0.000035 | 0.282121378 | 1364  | -21.88942129  | 1.060876638 | 7.201372173  | 1560.3882 | 1671.439694 | 15.15 |
| Sequence 77 | 0.282155 | 0.000036 | 0.001286  | 0.000089  | 0.0306  | 0.0021  | 1.467253 | 0.000035 | 0.282123529 | 1295  | -22.27840939  | 1.273051965 | 5.702806072  | 1557.4094 | 1710.603816 | 21.6  |
| Sequence 78 | 0.282176 | 0.000031 | 0.00069   | 0.000045  | 0.0184  | 0.0016  | 1.467258 | 0.000028 | 0.282157793 | 1395  | -21.53579575  | 1.096239192 | 9.201498897  | 1504.1499 | 1570.78987  | 18.3  |
| Sequence 79 | 0.28252  | 0.000029 | 0.001792  | 0.000032  | 0.03741 | 0.00073 | 1.467277 | 0.00004  | 0.282508939 | 329.6 | -9.371076967  | 1.025514083 | -2.429838609 | 1057.5672 | 1464.137538 | 17.5  |
| Sequence 80 | 0.282706 | 0.000027 | 0.002333  | 0.000021  | 0.05759 | 0.00054 | 1.467268 | 0.00003  | 0.282691612 | 329.3 | -2.793641813  | 0.954788974 | 4.028010046  | 801.8437  | 1055.914697 | 20.1  |
| Sequence 81 | 0.282471 | 0.000032 | 0.001372  | 0.000083  | 0.0411  | 0.0034  | 1.467254 | 0.000036 | 0.282452381 | 722   | -11.10384214  | 1.131601747 | 4.369590918  | 1155.152  | 1342.798271 | 12.56 |
| Sequence 82 | 0.282015 | 0.000032 | 0.001321  | 0.000035  | 0.0381  | 0.0011  | 1.467251 | 0.000044 | 0.28198161  | 1337  | -27.22916704  | 1.131601747 | 1.627399127  | 1754.9327 | 1997.742806 | 19    |
| Sequence 83 | 0.282466 | 0.000023 | 0.001035  | 0.000014  | 0.02659 | 0.00042 | 1.467262 | 0.000029 | 0.282457126 | 457.3 | -11.28065491  | 0.813338756 | -1.40803514  | 1112.2179 | 1499.287704 | 21.1  |
| Sequence 84 | 0.282594 | 0.000023 | 0.001434  | 0.000015  | 0.03221 | 0.00045 | 1.467254 | 0.000035 | 0.282588076 | 220.8 | -6.754247927  | 0.813338756 | -2.056537629 | 942.17538 | 1355.981867 | 17.71 |
| Sequence 85 | 0.282747 | 0.000052 | 0.001698  | 0.000059  | 0.041   | 0.0016  | 1.467316 | 0.000057 | 0.282738266 | 274.8 | -1.3437777074 | 1.838852839 | 4.461743631  | 729.07934 | 985.6123392 | 13    |
| Sequence 86 | 0.282184 | 0.000029 | 0.000906  | 0.000018  | 0.02325 | 0.00053 | 1.467264 | 0.000031 | 0.282162781 | 1240  | -21.25289531  | 1.025514083 | 5.841231321  | 1501.5827 | 1658.521776 | 16.1  |
| Sequence 87 | 0.282563 | 0.000038 | 0.00322   | 0.00011   | 0.0982  | 0.0039  | 1.467223 | 0.000032 | 0.282531587 | 520   | -7.850487119  | 1.343777074 | 2.633232135  | 1035.8818 | 1293.718161 | 21.4  |
| Sequence 88 | 0.282206 | 0.00005  | 0.000649  | 0.00003   | 0.01896 | 0.00097 | 1.467388 | 0.000054 | 0.282193263 | 1041  | -20.47491911  | 1.76812773  | 2.399006174  | 1461.1359 | 1717.180384 | 9.3   |
| Sequence 89 | 0.282126 | 0.000029 | 0.000884  | 0.000019  | 0.02178 | 0.00049 | 1.467254 | 0.000035 | 0.282104383 | 1294  | -23.30392348  | 1.025514083 | 5.001003859  | 1581.173  | 1753.667933 | 21.7  |
| Sequence 90 | 0.282209 | 0.000078 | 0.000679  | 0.000058  | 0.0183  | 0.0017  | 1.467308 | 0.00008  | 0.282194626 | 1122  | -20.36883144  | 2.758279258 | 4.285909359  | 1458.1369 | 1662.819872 | 12.3  |
| Sequence 91 | 0.282238 | 0.000031 | 0.000958  | 0.00002   | 0.022   | 0.00044 | 1.467252 | 0.000044 | 0.282217702 | 1123  | -19.34331736  | 1.096239192 | 5.126703648  | 1428.4763 | 1610.955271 | 20.3  |
| Sequence 92 | 0.282698 | 0.000048 | 0.001524  | 0.000039  | 0.03425 | 0.00098 | 1.467266 | 0.000041 | 0.282691505 | 227.8 | -3.076542249  | 1.69740262  | 1.758783512  | 795.83045 | 1120.244784 | 10.69 |
| Sequence 93 | 0.282052 | 0.00003  | 0.001031  | 0.000034  | 0.02502 | 0.00076 | 1.467279 | 0.000034 | 0.282023154 | 1478  | -25.92075252  | 1.060876638 | 6.323761983  | 1690.1717 | 1816.431418 | 16.6  |
| Sequence 94 | 0.281658 | 0.000031 | 0.001219  | 0.000037  | 0.03093 | 0.00097 | 1.467308 | 0.000036 | 0.281616103 | 1810  | -39.85359902  | 1.096239192 | -0.499231436 | 2245.6481 | 2500.566878 | 15.5  |
| Sequence 95 | 0.282716 | 0.000029 | 0.00087   | 0.000066  | 0.0213  | 0.0019  | 1.467284 | 0.000034 | 0.28271168  | 265.3 | -2.440016267  | 1.025514083 | 3.309015585  | 756.74025 | 1051.325732 | 15.5  |
| Sequence 96 | 0.282145 | 0.000036 | 0.001296  | 0.000025  | 0.03517 | 0.00073 | 1.467279 | 0.000038 | 0.282129421 | 640   | -22.63203494  | 1.273051965 | -8.913155262 | 1571.843  | 2110.134846 | 13.6  |
| Sequence 97 | 0.282231 | 0.000028 | 0.001023  | 0.000023  | 0.02731 | 0.00067 | 1.467292 | 0.00003  | 0.282211721 | 1000  | -19.59085524  | 0.990151529 | 2.123883492  | 1440.6934 | 1702.203568 | 19.5  |
| Sequence 98 | 0.282806 | 0.000033 | 0.002038  | 0.000029  | 0.05442 | 0.00088 | 1.467257 | 0.000048 | 0.282796767 | 242.1 | 0.742613646   | 1.166964302 | 5.8019936    | 650.05903 | 874.7102327 | 14.2  |
| Sequence 99 | 0.282349 | 0.000024 | 0.001229  | 0.000019  | 0.03173 | 0.00053 | 1.467256 | 0.000032 | 0.282323804 | 1087  | -15.4180738   | 0.84870131  | 8.070224307  | 1282.8182 | 1397.724364 | 16.74 |



|              | 176Hf/177Hf<br>fstnorm | 176Hf/177Hf<br>corr 2SE | 176Lu/177Hf<br>corr | 176Lu/177Hf<br>corr 2SE | 176Yb/177Hf<br>corr | 176Yb/177Hf<br>corr 2SE | 178Hf/177Hf<br>2SE | 176Hf/177Hf<br>t (age, Ma) | εHf(0)      | ±2 sigma | εHf(t)       | TDM         | TDM C*       | TotalHfBe<br>am (V) |             |      |
|--------------|------------------------|-------------------------|---------------------|-------------------------|---------------------|-------------------------|--------------------|----------------------------|-------------|----------|--------------|-------------|--------------|---------------------|-------------|------|
| Sequence 106 | 0.282585               | 0.000026                | 0.001974            | 0.000026                | 0.04994             | 0.00068                 | 1.467233           | 0.000028                   | 0.28257306  | 323      | -7.072510918 | 0.919426419 | -0.308089325 | 969.01699           | 1325.28562  | 23.2 |
| Sequence 107 | 0.28112                | 0.000033                | 0.000536            | 0.000032                | 0.0141              | 0.0012                  | 1.467252           | 0.000041                   | 0.281090116 | 2906     | -58.87865339 | 1.166964302 | 6.352311587  | 2931.3685           | 2947.043293 | 25   |
| Sequence 108 | 0.282592               | 0.00004                 | 0.001844            | 0.000031                | 0.04232             | 0.00075                 | 1.467313           | 0.000043                   | 0.282584282 | 223.7    | -6.824973036 | 1.414502184 | -2.126148342 | 955.52775           | 1362.628446 | 11.2 |
| z12-04_1     | 0.281879               | 0.000047                | 0.000891            | 0.000022                | 0.025               | 0.00063                 | 1.467275           | 0.00005                    | 0.281869874 | 545.8    | -32.03847446 | 1.662040066 | -20.21621349 | 1922.8214           | 2736.303945 | 14.2 |

#### Z12-06

##### Zacatecas Fm.

|              |          |          |           |           |          |          |          |          |             |       |              |             |              |           |             |       |
|--------------|----------|----------|-----------|-----------|----------|----------|----------|----------|-------------|-------|--------------|-------------|--------------|-----------|-------------|-------|
| z12-06       | 0.28228  | 0.000022 | 0.0007309 | 0.0000091 | 0.018    | 0.00034  | 1.467284 | 0.000029 | 0.282264793 | 1103  | -17.85809007 | 0.777976201 | 6.341728725  | 1361.7883 | 1518.983449 | 17.1  |
| Sequence 115 | 0.282073 | 0.000017 | 0.00013   | 0.000014  | 0.00331  | 0.00034  | 1.467269 | 0.000027 | 0.28207028  | 1109  | -25.17813887 | 0.601163428 | -0.41755965  | 1622.4799 | 1946.241413 | 21    |
| Sequence 116 | 0.282229 | 0.000026 | 0.000774  | 0.000015  | 0.01939  | 0.00038  | 1.467224 | 0.000027 | 0.282213441 | 1066  | -19.66158035 | 0.919426419 | 3.681363048  | 1434.0574 | 1656.58747  | 14.88 |
| Sequence 117 | 0.282141 | 0.000022 | 0.0005228 | 0.000005  | 0.01295  | 0.00016  | 1.467234 | 0.000029 | 0.282128985 | 1217  | -22.77348516 | 0.777976201 | 4.119076569  | 1545.7091 | 1748.070618 | 18.2  |
| Sequence 118 | 0.282164 | 0.000021 | 0.0005412 | 0.0000048 | 0.0137   | 0.00015  | 1.467256 | 0.000024 | 0.282151831 | 1191  | -21.9601464  | 0.742613646 | 4.337424559  | 1514.8264 | 1713.943729 | 17.7  |
| Sequence 119 | 0.282326 | 0.000021 | 0.000594  | 0.000015  | 0.01556  | 0.0004   | 1.467271 | 0.000033 | 0.282315562 | 933   | -16.23141256 | 0.742613646 | 4.286821221  | 1293.3408 | 1513.981804 | 19.78 |
| Sequence 120 | 0.282185 | 0.000025 | 0.001074  | 0.000016  | 0.02713  | 0.00044  | 1.467222 | 0.00003  | 0.2821596   | 1252  | -21.21753275 | 0.884063865 | 6.001819347  | 1506.8518 | 1657.947656 | 14.66 |
| Sequence 121 | 0.282295 | 0.000019 | 0.000889  | 0.000015  | 0.02259  | 0.00032  | 1.467242 | 0.000026 | 0.282281605 | 801   | -17.32765175 | 0.671888537 | 0.10125777   | 1346.5726 | 1672.905546 | 18.32 |
| Sequence 122 | 0.282167 | 0.00002  | 0.000514  | 0.00002   | 0.01322  | 0.00054  | 1.467256 | 0.000032 | 0.282155433 | 1192  | -21.85405874 | 0.707251092 | 4.487887243  | 1509.6308 | 1705.323507 | 18.43 |
| Sequence 123 | 0.282458 | 0.000025 | 0.001221  | 0.000046  | 0.03123  | 0.00098  | 1.467247 | 0.000026 | 0.282442908 | 658   | -11.56355535 | 0.884063865 | 2.59322462   | 1129.0104 | 1404.437819 | 20    |
| Sequence 124 | 0.282299 | 0.000021 | 0.00068   | 0.000012  | 0.01869  | 0.00033  | 1.467248 | 0.00003  | 0.282290788 | 643   | -17.18620153 | 0.742613646 | -3.131250142 | 1333.664  | 1751.975676 | 19.1  |
| Sequence 125 | 0.282072 | 0.000019 | 0.000808  | 0.000021  | 0.01797  | 0.00042  | 1.467271 | 0.000033 | 0.282056081 | 1045  | -25.21350142 | 0.671888537 | -2.372769963 | 1652.6776 | 2017.900578 | 17.1  |
| Sequence 128 | 0.282151 | 0.000019 | 0.0007415 | 0.0000037 | 0.01839  | 0.00012  | 1.46725  | 0.000029 | 0.282135558 | 1104  | -22.41985961 | 0.671888537 | 1.783039473  | 1540.7388 | 1805.124536 | 21.3  |
| Sequence 129 | 0.282156 | 0.000021 | 0.0004356 | 0.0000075 | 0.01136  | 0.00019  | 1.46724  | 0.000029 | 0.282147343 | 1054  | -22.24304684 | 0.742613646 | 1.066170043  | 1521.6435 | 1810.661438 | 17.58 |
| Sequence 130 | 0.282142 | 0.00002  | 0.000504  | 0.0000038 | 0.01255  | 0.0001   | 1.46729  | 0.000029 | 0.282130802 | 1177  | -22.7381226  | 0.707251092 | 3.273334388  | 1543.58   | 1769.419545 | 16.88 |
| Sequence 131 | 0.282241 | 0.000023 | 0.000916  | 0.000016  | 0.0243   | 0.00042  | 1.467255 | 0.000032 | 0.282222726 | 1058  | -19.2372297  | 0.813338756 | 3.828971441  | 1422.7226 | 1641.050717 | 17.01 |
| Sequence 132 | 0.281889 | 0.000025 | 0.001189  | 0.000043  | 0.0302   | 0.0011   | 1.467237 | 0.00003  | 0.281853518 | 1575  | -31.68484891 | 0.884063865 | 2.526926103  | 1924.0604 | 2129.018164 | 13.48 |
| Sequence 133 | 0.282106 | 0.000018 | 0.000346  | 0.000029  | 0.00861  | 0.00071  | 1.467257 | 0.000025 | 0.282099335 | 1022  | -24.01117457 | 0.636525983 | -1.360928114 | 1586.4768 | 1936.96888  | 19.6  |
| Sequence 134 | 0.282358 | 0.000022 | 0.001296  | 0.000023  | 0.03246  | 0.00056  | 1.467269 | 0.000032 | 0.282346529 | 472   | -15.09981081 | 0.777976201 | -4.993897557 | 1272.4216 | 1735.686885 | 17.79 |
| Sequence 135 | 0.28227  | 0.000024 | 0.000726  | 0.000014  | 0.01959  | 0.00037  | 1.467267 | 0.000029 | 0.282255517 | 1058  | -18.21171561 | 0.84870131  | 4.991277223  | 1375.4719 | 1568.209846 | 16.16 |
| Sequence 136 | 0.282563 | 0.000024 | 0.001856  | 0.000021  | 0.04185  | 0.00051  | 1.467256 | 0.000031 | 0.282554773 | 236.9 | -7.850487119 | 0.84870131  | -2.876058414 | 997.57544 | 1420.162803 | 16.03 |
| Sequence 137 | 0.282149 | 0.00002  | 0.00049   | 0.000023  | 0.01249  | 0.00057  | 1.467224 | 0.000032 | 0.282137889 | 1201  | -22.49058472 | 0.707251092 | 4.070610849  | 1533.408  | 1738.498007 | 18.17 |
| Sequence 138 | 0.282562 | 0.000024 | 0.001275  | 0.000039  | 0.02685  | 0.00083  | 1.467262 | 0.000029 | 0.282555401 | 276.5 | -7.885849674 | 0.84870131  | -1.970858632 | 983.52232 | 1393.916835 | 16.95 |
| Sequence 139 | 0.28176  | 0.000025 | 0.000769  | 0.000033  | 0.0186   | 0.00079  | 1.467263 | 0.000026 | 0.281732128 | 1907  | -36.24661846 | 0.884063865 | 5.858729176  | 2079.873  | 2184.735618 | 16.1  |
| Sequence 140 | 0.281931 | 0.000026 | 0.001272  | 0.00005   | 0.0336   | 0.0013   | 1.467265 | 0.000022 | 0.281891524 | 1637  | -30.19962162 | 0.919426419 | 5.298723158  | 1869.8054 | 2005.915156 | 19.21 |
| Sequence 141 | 0.282276 | 0.000027 | 0.001369  | 0.000023  | 0.03389  | 0.00067  | 1.467254 | 0.00003  | 0.282262644 | 520   | -17.99954029 | 0.954788974 | -6.88828931  | 1390.5908 | 1891.281786 | 16.63 |
| Sequence 142 | 0.282191 | 0.000025 | 0.001078  | 0.000024  | 0.0281   | 0.00066  | 1.46726  | 0.000022 | 0.282166843 | 1187  | -21.00535743 | 0.884063865 | 4.778709892  | 1498.6385 | 1683.193388 | 19    |
| Sequence 143 | 0.281949 | 0.000024 | 0.001122  | 0.000033  | 0.02903  | 0.00094  | 1.467253 | 0.000032 | 0.281917242 | 1495  | -29.56309564 | 0.84870131  | 2.95508245   | 1837.4262 | 2039.48185  | 18.3  |
| Sequence 144 | 0.282085 | 0.00002  | 0.000208  | 0.000027  | 0.00505  | 0.00059  | 1.467237 | 0.000029 | 0.282081163 | 979   | -24.75378821 | 0.707251092 | -2.978800087 | 1609.4151 | 2004.129688 | 21.6  |
| Sequence 145 | 0.28216  | 0.000026 | 0.000692  | 0.000014  | 0.01811  | 0.00039  | 1.46725  | 0.000029 | 0.282143528 | 1260  | -22.10159662 | 0.919426419 | 5.614182287  | 1526.3217 | 1688.514837 | 17.17 |
| Sequence 146 | 0.28215  | 0.00002  | 0.000653  | 0.00002   | 0.0163   | 0.00049  | 1.467259 | 0.000022 | 0.282135579 | 1170  | -22.45522217 | 0.707251092 | 3.283504998  | 1538.5566 | 1763.278133 | 18.69 |
| Sequence 147 | 0.282247 | 0.000027 | 0.0007574 | 0.0000094 | 0.01971  | 0.00025  | 1.467297 | 0.000029 | 0.282232337 | 1027  | -19.02505437 | 0.954788974 | 3.466536309  | 1408.4916 | 1639.366347 | 16    |
| Sequence 148 | 0.282129 | 0.000028 | 0.0009653 | 0.000006  | 0.0241   | 0.00023  | 1.467258 | 0.000032 | 0.282120056 | 494   | -23.19783581 | 0.990151529 | -12.51863664 | 1580.3892 | 2221.560167 | 16.8  |
| Sequence 149 | 0.282316 | 0.000023 | 0.000601  | 0.000017  | 0.01625  | 0.0003   | 1.46725  | 0.000026 | 0.282310137 | 520   | -16.5850381  | 0.813338756 | -5.206889076 | 1307.4077 | 1786.241879 | 18.3  |
| Sequence 150 | 0.282175 | 0.00002  | 0.000847  | 0.000022  | 0.02251  | 0.00057  | 1.467237 | 0.000026 | 0.282155955 | 1191  | -21.5711583  | 0.707251092 | 4.483653135  | 1511.7372 | 1704.800353 | 19.3  |
| Sequence 151 | 0.282323 | 0.000024 | 0.001196  | 0.000011  | 0.03086  | 0.00045  | 1.467275 | 0.000029 | 0.282312684 | 460   | -16.33750022 | 0.84870131  | -6.460624075 | 1318.228  | 1818.13453  | 18.8  |
| Sequence 152 | 0.282191 | 0.000023 | 0.000597  | 0.000012  | 0.01561  | 0.00028  | 1.467277 | 0.000031 | 0.282178635 | 1098  | -21.00535743 | 0.813338756 | 3.17390613   | 1479.831  | 1713.506688 | 16.2  |
| Sequence 153 | 0.282198 | 0.000024 | 0.000357  | 0.000019  | 0.00963  | 0.00054  | 1.467254 | 0.000031 | 0.282190824 | 1066  | -20.75781954 | 0.84870131  | 2.879630735  | 1461.0328 | 1706.758333 | 15.17 |
| Sequence 154 | 0.282181 | 0.000026 | 0.001237  | 0.000027  | 0.03051  | 0.0006   | 1.467252 | 0.000027 | 0.282151721 | 1253  | -21.35898297 | 0.919426419 | 5.745211407  | 1518.9726 | 1764.793059 | 18.5  |
| Sequence 155 | 0.282274 | 0.000022 | 0.000995  | 0.000023  | 0.02396  | 0.00045  | 1.467272 | 0.000026 | 0.282255589 | 982   | -18.0702654  | 0.777976201 | 3.270856676  | 1379.6551 | 1616.248724 | 17.7  |
| Sequence 156 | 0.28219  | 0.000029 | 0.000602  | 0.00004   | 0.01553  | 0.00098  | 1.467251 | 0.000033 | 0.28217628  | 1207  | -21.04071998 | 1.025514083 | 5.568463581  | 1481.4025 | 1649.54617  | 16.55 |
| Sequence 157 | 0.282234 | 0.000031 | 0.001509  | 0.000051  | 0.0373   | 0.0013   | 1.467276 | 0.000038 | 0.282199984 | 1194  | -19.48476758 | 1.096239192 | 6.113056023  | 1455.178  | 1605.180348 | 13.23 |
| Sequence 158 | 0.282258 | 0.000024 | 0.000782  | 0.00001   | 0.02033  | 0.00028  | 1.467265 | 0.000026 | 0.282243531 | 982   | -18.63066627 | 0.84870131  | 2.84348526   | 1394.1431 | 1643.023896 | 17.33 |
| Sequence 159 | 0.282289 | 0.000022 | 0.000711  | 0.000037  | 0.01774  | 0.00091  | 1.467207 | 0.000024 | 0.282275871 | 980   | -17.53982708 | 0.777976201 | 3.944352627  | 1348.6074 | 1572.453078 | 19.2  |
| Sequence 160 | 0.281958 | 0.000021 | 0.0003446 | 0.0000071 | 0.00849  | 0.00019  | 1.467264 | 0.000026 | 0.281948683 | 1429  | -29.24483265 | 0.742613646 | 2.560573114  | 1788.2649 | 2012.051164 | 19.8  |
| Sequence 161 | 0.280955 | 0.000022 | 0.0004018 | 0.0000044 | 0.010238 | 0.000091 | 1.467236 | 0.00003  | 0.280934463 | 2670  | -64.7134749  | 0.777976201 | -4.737825106 | 3141.0782 | 3432.877681 | 17.03 |
| Sequence 162 | 0.282303 | 0.00002  | 0.0003363 | 0.0000043 | 0.00811  | 0.00011  | 1.467259 | 0.000025 | 0.282296291 | 1058  | -17.04475131 | 0.707251092 | 6.4365836    | 1316.2772 | 1477.495139 | 17.57 |
| Sequence 163 | 0.282051 | 0.000022 | 0.00064   | 0.000064  | 0.0161   | 0.0016   | 1.467291 | 0.000028 | 0.282037608 | 1060  | -25.95611507 | 0.777976201 | -2.687479784 | 1675.6261 | 2049.167494 | 18.1  |
| Sequence 164 | 0.282682 | 0.000019 | 0.001104  | 0.000024  | 0.02503  | 0.00061  | 1.46726  | 0.000028 | 0.282675799 | 300   | -3.642343123 | 0.671888537 | 2.813935439  | 809.57206 | 1109.900989 | 17.5  |
| Sequence 165 | 0.282354 | 0.000022 | 0.001422  | 0.000016  | 0.03432  | 0.00043  | 1.467238 | 0.000025 | 0.282341065 | 485   | -15.24126103 | 0.777976201 | -4.896168381 | 1282.3631 | 1739.653702 | 21.5  |
| z12-06       | 0.282247 | 0.000032 | 0.001056  | 0.000085  | 0.0271   | 0.0021   | 1.467294 | 0.000031 | 0.282261615 | 1049  | -19.02505437 | 1.131601747 | 3.744890775  | 1419.6059 | 1639.235792 | 15.4  |

|              | 176Hf/177Hf<br>fstnorm | 176Hf/177Hf<br>corr 2SE | 176Lu/177Hf<br>corr | 176Lu/177Hf<br>corr 2SE | 176Yb/177Hf<br>corr | 176Yb/177Hf<br>corr 2SE | 178Hf/177Hf | 178Hf/177Hf<br>2SE | 176Hf/177Hf | t (age,<br>Ma) | εHf(0)       | ±2 sigma    | εHf(t)       | TDM       | TDM C*      | TotalHfBe<br>am (V) |
|--------------|------------------------|-------------------------|---------------------|-------------------------|---------------------|-------------------------|-------------|--------------------|-------------|----------------|--------------|-------------|--------------|-----------|-------------|---------------------|
| Sequence 173 | 0.28297                | 0.000021                | 0.001311            | 0.000057                | 0.028               | 0.0013                  | 1.467259    | 0.000024           | 0.282967001 | 122.4          | 6.542072599  | 0.742613646 | 9.1568451    | 402.84167 | 566.2218728 | 18.32               |
| Sequence 174 | 0.281798               | 0.000018                | 0.0005577           | 0.000008                | 0.01472             | 0.0002                  | 1.467256    | 0.000029           | 0.281791665 | 605            | -34.90284138 | 0.636525983 | -21.65908807 | 2016.7084 | 2869.792194 | 16.6                |
| Sequence 175 | 0.28241                | 0.000028                | 0.002103            | 0.00004                 | 0.0529              | 0.001                   | 1.467252    | 0.000026           | 0.282400871 | 232            | -13.26095797 | 0.990151529 | -8.430422519 | 1225.425  | 1765.179833 | 19.64               |
| Sequence 176 | 0.282298               | 0.000063                | 0.001422            | 0.000043                | 0.0368              | 0.0012                  | 1.46712     | 0.00011            | 0.282273634 | 910            | -17.22156409 | 2.227840939 | 2.28075668   | 1361.5005 | 1621.752168 | 18.2                |
| Sequence 177 | 0.282119               | 0.000018                | 0.0003491           | 0.000032                | 0.008282            | 0.00007                 | 1.467248    | 0.000026           | 0.282110757 | 1250           | -23.55146136 | 0.636525983 | 4.224189005  | 1568.836  | 1767.499563 | 18.63               |
| Sequence 178 | 0.282158               | 0.000021                | 0.000388            | 0.000016                | 0.01033             | 0.00041                 | 1.467256    | 0.000032           | 0.282148898 | 1242           | -22.17232173 | 0.742613646 | 5.394487213  | 1517.0254 | 1688.049987 | 17                  |
| Sequence 179 | 0.281622               | 0.000039                | 0.000603            | 0.000022                | 0.01458             | 0.00056                 | 1.467275    | 0.000045           | 0.281601857 | 1760           | -41.12665099 | 1.379139629 | -2.156281068 | 2258.7251 | 2563.277385 | 12.02               |
| Sequence 180 | 0.282512               | 0.000021                | 0.001781            | 0.000029                | 0.04624             | 0.00079                 | 1.467263    | 0.000026           | 0.282506709 | 158.9          | -9.653977403 | 0.742613646 | -6.313157113 | 1068.7241 | 1575.947027 | 24.7                |
| Sequence 181 | 0.282957               | 0.000017                | 0.0009709           | 0.0000093               | 0.02009             | 0.0002                  | 1.467228    | 0.000029           | 0.282954853 | 118.3          | 6.08235939   | 0.601163428 | 8.635904428  | 417.65682 | 596.3325105 | 19.06               |
| Sequence 182 | 0.282177               | 0.000021                | 0.000789            | 0.00001                 | 0.02069             | 0.00028                 | 1.467239    | 0.000027           | 0.282160178 | 1130           | -21.50043319 | 0.742613646 | 3.246389438  | 1506.6694 | 1734.13741  | 16.79               |
| Sequence 183 | 0.282373               | 0.000027                | 0.00101             | 0.000033                | 0.02675             | 0.00089                 | 1.467273    | 0.000028           | 0.282362518 | 553            | -14.56937249 | 0.954788974 | -2.612314784 | 1241.8113 | 1649.43457  | 17.8                |
| Sequence 184 | 0.282263               | 0.000023                | 0.000846            | 0.000033                | 0.02134             | 0.00071                 | 1.467284    | 0.000028           | 0.282251167 | 744            | -18.45925235 | 0.813338756 | -2.261894118 | 1389.54   | 1776.265936 | 16.44               |
| Sequence 185 | 0.282237               | 0.000023                | 0.0004983           | 0.0000074               | 0.01249             | 0.0002                  | 1.467237    | 0.000027           | 0.282226926 | 1072           | -19.37867992 | 0.813338756 | 4.295537841  | 1412.7534 | 1622.845821 | 15.53               |
| Sequence 186 | 0.2822                 | 0.00003                 | 0.00315             | 0.00017                 | 0.0884              | 0.0054                  | 1.467265    | 0.000042           | 0.282119175 | 1357           | -20.68709444 | 1.060876638 | 6.963326332  | 1572.1592 | 1680.789221 | 12.23               |
| Sequence 187 | 0.282332               | 0.00002                 | 0.000527            | 0.000014                | 0.01247             | 0.00033                 | 1.467256    | 0.000027           | 0.282326511 | 555            | -16.01923723 | 0.707251092 | -3.842331315 | 1282.7961 | 1728.040945 | 19.4                |
| Sequence 188 | 0.28128                | 0.000025                | 0.0005893           | 0.0000076               | 0.01481             | 0.00021                 | 1.46725     | 0.00003            | 0.281257899 | 1972           | -53.22064466 | 0.884063865 | -9.483597259 | 2720.3931 | 3176.135511 | 17.19               |
| Sequence 189 | 0.282295               | 0.000017                | 0.000801            | 0.000038                | 0.0184              | 0.0012                  | 1.467244    | 0.000023           | 0.282288031 | 464            | -17.32765175 | 0.601163428 | -7.243796238 | 1343.4602 | 1870.156719 | 22.1                |
| Sequence 190 | 0.282212               | 0.000025                | 0.000963            | 0.000036                | 0.0236              | 0.001                   | 1.467261    | 0.000031           | 0.282191872 | 1108           | -20.26274378 | 0.884063865 | 3.870220875  | 1464.872  | 1677.81394  | 18.7                |
| Sequence 191 | 0.282829               | 0.000023                | 0.001125            | 0.000038                | 0.02411             | 0.0009                  | 1.467234    | 0.00003            | 0.282826131 | 136.4          | 1.555952402  | 0.813338756 | 4.485537291  | 601.56012 | 875.480381  | 20.4                |
| Sequence 192 | 0.282071               | 0.000059                | 0.002098            | 0.000028                | 0.0519              | 0.0011                  | 1.467315    | 0.000048           | 0.282012059 | 1484           | -25.24886398 | 2.086390721 | 6.067488756  | 1711.9069 | 1837.15384  | 10.47               |
| Sequence 193 | 0.282357               | 0.000021                | 0.001417            | 0.000015                | 0.03231             | 0.00035                 | 1.46723     | 0.000024           | 0.282340101 | 635            | -15.13517336 | 0.742613646 | -1.564725903 | 1277.9496 | 1647.65265  | 22.5                |
| Sequence 194 | 0.282397               | 0.000024                | 0.000573            | 0.000021                | 0.01405             | 0.00058                 | 1.467273    | 0.000029           | 0.282389029 | 740            | -13.72067118 | 0.84870131  | 2.531228564  | 1194.4048 | 1472.65377  | 17.3                |
| Sequence 195 | 0.282957               | 0.000024                | 0.001129            | 0.000013                | 0.02319             | 0.00039                 | 1.467234    | 0.000035           | 0.28295366  | 158.2          | 6.08235939   | 0.84870131  | 9.48219196   | 419.42156 | 573.6686072 | 19.97               |
| Sequence 196 | 0.282322               | 0.000019                | 0.000458            | 0.0000044               | 0.0121              | 0.00012                 | 1.46727     | 0.000029           | 0.282317748 | 495            | -16.37286278 | 0.671888537 | -5.497642093 | 1294.2725 | 1785.039796 | 20.1                |
| Sequence 197 | 0.282968               | 0.000024                | 0.001264            | 0.000013                | 0.02669             | 0.00028                 | 1.467229    | 0.000029           | 0.282965248 | 116.5          | 6.47134749   | 0.84870131  | 8.963512947  | 405.19671 | 573.9421562 | 19.37               |
| Sequence 198 | 0.282201               | 0.000022                | 0.000517            | 0.0000055               | 0.01338             | 0.00014                 | 1.467258    | 0.000023           | 0.28219415  | 705            | -20.65173188 | 0.777976201 | -5.15944178  | 1462.9926 | 1926.820089 | 19.7                |
| Sequence 199 | 0.282446               | 0.00002                 | 0.000242            | 0.000015                | 0.00584             | 0.00038                 | 1.467255    | 0.000037           | 0.282443926 | 457            | -11.98790601 | 0.707251092 | -1.881985499 | 1116.8387 | 1528.846682 | 17.1                |
| Sequence 200 | 0.282824               | 0.000022                | 0.0012288           | 0.0000045               | 0.02987             | 0.00013                 | 1.467263    | 0.000032           | 0.282820913 | 134.4          | 1.379139629  | 0.777976201 | 4.256424324  | 610.35413 | 888.4949743 | 18.2                |
| Sequence 201 | 0.282412               | 0.000027                | 0.00272             | 0.00014                 | 0.0556              | 0.003                   | 1.467303    | 0.000035           | 0.282388591 | 459            | -13.19023286 | 0.954788974 | -3.796013704 | 1243.4377 | 1650.548956 | 15.4                |
| Sequence 202 | 0.282937               | 0.000024                | 0.000931            | 0.000031                | 0.02243             | 0.00074                 | 1.467266    | 0.000027           | 0.282934579 | 139.1          | 5.375108298  | 0.84870131  | 8.381802098  | 445.57441 | 628.9982867 | 18.63               |
| Sequence 203 | 0.282975               | 0.000025                | 0.001236            | 0.000029                | 0.02599             | 0.00058                 | 1.467256    | 0.000033           | 0.282972404 | 112.4          | 6.718885372  | 0.884063865 | 9.125372084  | 394.87901 | 560.3413999 | 15.53               |
| Sequence 204 | 0.282254               | 0.00002                 | 0.001131            | 0.00001                 | 0.03011             | 0.00031                 | 1.467251    | 0.000027           | 0.282238052 | 750            | -18.77751649 | 0.707251092 | -2.591282882 | 1412.6277 | 1801.527374 | 22.2                |
| Sequence 205 | 0.282947               | 0.000024                | 0.000896            | 0.000015                | 0.02191             | 0.00042                 | 1.46722     | 0.00003            | 0.282944896 | 125.6          | 5.728733844  | 0.84870131  | 8.446201989  | 430.995   | 614.2297249 | 15.68               |
| Sequence 206 | 0.282255               | 0.000022                | 0.0005965           | 0.0000052               | 0.01522             | 0.00014                 | 1.46726     | 0.000023           | 0.282242157 | 1141           | -18.74215393 | 0.777976201 | 6.402784666  | 1391.5316 | 1545.16175  | 18.8                |
| Sequence 207 | 0.282431               | 0.000042                | 0.001031            | 0.0000045               | 0.0275              | 0.00014                 | 1.467269    | 0.000051           | 0.282419269 | 606            | -12.51834433 | 1.485227293 | 0.587059985  | 1161.213  | 1489.933454 | 8.39                |
| Sequence 208 | 0.282389               | 0.000024                | 0.001073            | 0.000066                | 0.0232              | 0.0015                  | 1.467265    | 0.000032           | 0.282380392 | 428            | -14.00357162 | 0.84870131  | -4.780033239 | 1221.4464 | 1688.16281  | 16.38               |
| Sequence 209 | 0.28293                | 0.000041                | 0.001696            | 0.000075                | 0.0421              | 0.0019                  | 1.467281    | 0.000043           | 0.282926259 | 118            | 5.127570416  | 1.449864738 | 7.617814138  | 464.94966 | 661.2093456 | 13.5                |
| Sequence 210 | 0.282824               | 0.000037                | 0.0016929           | 0.0000052               | 0.04205             | 0.00016                 | 1.467242    | 0.000053           | 0.282819889 | 129.9          | 1.379139629  | 1.30841452  | 4.120079814  | 618.02669 | 893.6429414 | 9.6                 |
| Sequence 211 | 0.282129               | 0.000025                | 0.000633            | 0.000045                | 0.0147              | 0.0011                  | 1.467308    | 0.000032           | 0.28211683  | 1020           | -23.19783581 | 0.884063865 | -0.786149568 | 1566.6853 | 1899.592201 | 17.4                |
| Sequence 212 | 0.281658               | 0.000021                | 0.00104             | 0.00002                 | 0.02541             | 0.00053                 | 1.467272    | 0.000025           | 0.281623459 | 1750           | -39.85359902 | 0.742613646 | -1.619411037 | 2235.1101 | 2522.438967 | 16.51               |
| Sequence 213 | 0.282419               | 0.000034                | 0.001671            | 0.00002                 | 0.04339             | 0.00038                 | 1.467231    | 0.000034           | 0.282404524 | 462            | -12.94269498 | 1.202326856 | -3.164809723 | 1198.3407 | 1613.290285 | 12.68               |
| Sequence 214 | 0.282676               | 0.000027                | 0.001105            | 0.000027                | 0.02657             | 0.00069                 | 1.467279    | 0.00003            | 0.282672713 | 159.1          | -3.85451845  | 0.954788974 | -0.436296568 | 818.08067 | 1205.583221 | 16.47               |
| Sequence 215 | 0.282752               | 0.000027                | 0.001485            | 0.000023                | 0.03706             | 0.00058                 | 1.467276    | 0.000033           | 0.282748183 | 137.5          | -1.166964302 | 0.954788974 | 1.752719153  | 717.74318 | 1050.02925  | 16.34               |
| Sequence 216 | 0.282792               | 0.000029                | 0.001826            | 0.000055                | 0.0438              | 0.0013                  | 1.467251    | 0.000031           | 0.282787532 | 130.9          | 0.247537882  | 1.025514083 | 2.997761027  | 666.56659 | 965.8018753 | 13.39               |
| Sequence 217 | 0.282615               | 0.000025                | 0.001169            | 0.000044                | 0.03                | 0.0012                  | 1.467267    | 0.000026           | 0.282611518 | 159.3          | -6.01163428  | 0.884063865 | -2.596614692 | 905.83097 | 1342.238338 | 17.7                |
| Sequence 218 | 0.282637               | 0.000032                | 0.001662            | 0.00005                 | 0.0404              | 0.0011                  | 1.467316    | 0.000039           | 0.282632047 | 159.4          | -5.233658079 | 1.131601747 | -1.86819363  | 886.34404 | 1296.329864 | 16.2                |
| Sequence 219 | 0.282371               | 0.000032                | 0.002241            | 0.000081                | 0.0569              | 0.0019                  | 1.4673      | 0.00005            | 0.282351798 | 457            | -14.6400976  | 1.131601747 | -5.143216134 | 1286.4774 | 1733.401376 | 10.83               |
| Sequence 220 | 0.28212                | 0.00002                 | 0.0006988           | 0.0000073               | 0.01783             | 0.0002                  | 1.467277    | 0.000027           | 0.282103593 | 1243           | -23.5160988  | 0.707251092 | 3.810704758  | 1581.7956 | 1787.804497 | 20.3                |
| Sequence 221 | 0.282225               | 0.000024                | 0.001283            | 0.000024                | 0.03273             | 0.00058                 | 1.467269    | 0.000029           | 0.282200309 | 1021           | -19.80303057 | 0.84870131  | 2.195298519  | 1459.0761 | 1714.218912 | 19.6                |
| z12-08_1     | 0.282827               | 0.000025                | 0.001174            | 0.000012                | 0.02876             | 0.00037                 | 1.467232    | 0.000029           | 0.282823963 | 138.4          | 1.485227293  | 0.884063865 | 4.453330463  | 605.19291 | 879.0997909 | 16.12               |

# Z12-09

## Las Pilas Volcanosedimentary Complex (LPVCS)

|              |          |          |           |           |          |          |          |          |             |       |              |             |              |           |             |       |
|--------------|----------|----------|-----------|-----------|----------|----------|----------|----------|-------------|-------|--------------|-------------|--------------|-----------|-------------|-------|
| z12-09       | 0.282614 | 0.000027 | 0.0007012 | 0.0000082 | 0.01714  | 0.00017  | 1.467216 | 0.000039 | 0.282610064 | 299.8 | -6.046996835 | 0.954788974 | 0.483362383  | 896.08121 | 1257.203938 | 16.15 |
| Sequence 228 | 0.282202 | 0.000023 | 0.000859  | 0.000012  | 0.02195  | 0.0003   | 1.467214 | 0.00003  | 0.282181602 | 1257  | -20.61636933 | 0.813338756 | 6.896027362  | 1474.7505 | 1605.91289  | 18.23 |
| Sequence 229 | 0.282156 | 0.000023 | 0.0007351 | 0.0000023 | 0.019555 | 0.000048 | 1.467226 | 0.000031 | 0.282139499 | 1189  | -22.24304684 | 0.813338756 | 3.854670555  | 1533.5715 | 1742.543777 | 15.37 |
| Sequence 230 | 0.28216  | 0.000024 | 0.000719  | 0.000028  | 0.01859  | 0.00073  | 1.467284 | 0.000032 | 0.282144039 | 1176  | -22.10159662 | 0.84870131  | 3.719919218  | 1527.3999 | 1740.731572 | 15.45 |
| Sequence 231 | 0.282024 | 0.000019 | 0.0005075 | 0.0000089 | 0.01264  | 0.00024  | 1.467273 | 0.000029 | 0.282011192 | 1335  | -26.91090404 | 0.671888537 | 2.630988103  | 1705.5328 | 1933.738929 | 16.32 |
| Sequence 232 | 0.28265  | 0.000024 | 0.001075  | 0.000018  | 0.02586  | 0.00043  | 1.467272 | 0.000034 | 0.282646504 | 173.9 | -4.77394487  | 0.84870131  | -1.034013366 | 854.16078 | 1254.911323 | 19.14 |
| Sequence 233 | 0.28274  | 0.000023 | 0.001004  | 0.000011  | 0.02398  | 0.00028  | 1.467258 | 0.000033 | 0.282737057 | 156.8 | -1.591314957 | 0.813338756 | 1.78866579   | 725.53102 | 1062.836278 | 18.06 |
| Sequence 234 | 0.282759 | 0.000023 | 0.001004  | 0.00001   | 0.02108  | 0.0002   | 1.467281 | 0.000031 | 0.282756214 | 163   | -0.919426419 | 0.813338756 | 2.604400564  | 697.01036 | 1015.911792 | 16.66 |

|              | 176Hf/177Hf<br>fstnorm | 176Hf/177Hf<br>corr 2SE | 176Lu/177Hf<br>corr | 176Lu/177Hf<br>corr 2SE | 176Yb/177Hf<br>corr | 176Yb/177Hf<br>corr 2SE | 178Hf/177Hf | 178Hf/177Hf<br>2SE | 176Hf/177Hf | t (age,<br>Ma) | εHf(0)       | ±2 sigma    | εHf(t)       | TDM         | TDM C*      | TotalHfBe<br>am (V) |
|--------------|------------------------|-------------------------|---------------------|-------------------------|---------------------|-------------------------|-------------|--------------------|-------------|----------------|--------------|-------------|--------------|-------------|-------------|---------------------|
| Sequence 235 | 0.28252                | 0.00003                 | 0.00077             | 0.000045                | 0.0182              | 0.0011                  | 1.467255    | 0.000031           | 0.28251346  | 453            | -9.371076967 | 1.060876638 | 0.489824612  | 1029.1187   | 1376.461602 | 14.63               |
| Sequence 236 | 0.282766               | 0.000023                | 0.00171             | 0.00002                 | 0.04156             | 0.00048                 | 1.467259    | 0.000026           | 0.282760852 | 161            | -0.671888537 | 0.813338756 | 2.723940744  | 701.94718   | 1006.762228 | 19.6                |
| Sequence 237 | 0.282202               | 0.000025                | 0.0005222           | 0.0000089               | 0.01284             | 0.00021                 | 0.467235    | 0.000032           | 0.282190627 | 1154           | -20.61636933 | 0.884063865 | 4.871416001  | 1461.8147   | 1651.380581 | 15.93               |
| Sequence 238 | 0.282636               | 0.00003                 | 0.001523            | 0.000037                | 0.03911             | 0.00096                 | 1.467266    | 0.000028           | 0.282631307 | 164.8          | -5.269020634 | 1.060876638 | -1.774187248 | 884.45922   | 1294.593562 | 16.64               |
| Sequence 239 | 0.282712               | 0.000019                | 0.0008016           | 0.0000064               | 0.01742             | 0.00015                 | 1.467236    | 0.000028           | 0.282708853 | 209.9          | -2.581466485 | 0.671888537 | 1.973572353  | 760.99145   | 1092.633595 | 16.94               |
| Sequence 240 | 0.282217               | 0.000021                | 0.001315            | 0.000019                | 0.02887             | 0.00047                 | 1.46728     | 0.000026           | 0.282189439 | 1111           | -20.08593101 | 0.742613646 | 3.852121056  | 1471.5606   | 1681.307541 | 18.8                |
| Sequence 241 | 0.282801               | 0.000026                | 0.001926            | 0.000025                | 0.05163             | 0.00074                 | 1.467258    | 0.000031           | 0.282794989 | 166.9          | 0.565800873  | 0.919426419 | 4.062925819  | 655.32861   | 926.2953961 | 15.85               |
| Sequence 242 | 0.282838               | 0.00003                 | 0.002009            | 0.000048                | 0.0537              | 0.0013                  | 1.467272    | 0.000028           | 0.282832039 | 158.7          | 1.874215393  | 1.060876638 | 5.190956022  | 602.99262   | 848.0692501 | 14.87               |
| Sequence 243 | 0.28184                | 0.000023                | 0.0006268           | 0.0000098               | 0.01651             | 0.00029                 | 1.467258    | 0.000031           | 0.281832631 | 626            | -33.41761409 | 0.813338756 | -19.73751074 | 1962.9474   | 2767.909584 | 17.36               |
| Sequence 244 | 0.282803               | 0.000026                | 0.00236             | 0.000097                | 0.0618              | 0.0027                  | 1.467228    | 0.000031           | 0.282796209 | 153.9          | 0.636525983  | 0.919426419 | 3.816619665  | 660.23567   | 931.7653615 | 14.6                |
| Sequence 245 | 0.282666               | 0.000025                | 0.001544            | 0.000013                | 0.03822             | 0.00034                 | 1.467261    | 0.000025           | 0.282661268 | 163.9          | -4.208143996 | 0.884063865 | -0.734322918 | 842.05806   | 1228.174499 | 15.34               |
| Sequence 246 | 0.28266                | 0.000021                | 0.001076            | 0.000024                | 0.02296             | 0.00046                 | 1.467287    | 0.000025           | 0.282654332 | 281.4          | -9.420319324 | 0.742613646 | 1.639097975  | 840.05815   | 1169.739308 | 17.37               |
| Sequence 247 | 0.282221               | 0.00005                 | 0.000571            | 0.00002                 | 0.01281             | 0.00034                 | 1.467184    | 0.000046           | 0.282208858 | 1127           | -19.94484079 | 1.76812773  | 4.904061967  | 1437.4918   | 1628.055193 | 7.6                 |
| Sequence 248 | 0.282823               | 0.000025                | 0.0018481           | 0.0000068               | 0.04804             | 0.00019                 | 1.467257    | 0.00003            | 0.282817585 | 156.7          | 1.343777074  | 0.884063865 | 4.635134655  | 622.08416   | 881.8877621 | 14.26               |
| Sequence 249 | 0.282851               | 0.000027                | 0.002035            | 0.000031                | 0.05125             | 0.00089                 | 1.467246    | 0.000028           | 0.282844973 | 158.4          | 2.333928603  | 0.954788974 | 5.641825718  | 584.48484   | 819.1101837 | 16.89               |
| Sequence 250 | 0.282235               | 0.00002                 | 0.000803            | 0.000011                | 0.02385             | 0.00046                 | 1.467272    | 0.000034           | 0.282626262 | 912            | -19.44940503 | 0.707251092 | 0.468349044  | 1426.781535 | 1736.781535 | 14.55               |
| Sequence 251 | 0.28218                | 0.000023                | 0.00058             | 0.000024                | 0.0129              | 0.00055                 | 1.467235    | 0.000032           | 0.282170073 | 909            | -21.39434553 | 0.813338756 | -1.411517886 | 1494.327    | 1851.868764 | 15.87               |
| Sequence 252 | 0.282379               | 0.000027                | 0.0015323           | 0.0000024               | 0.03943             | 0.000065                | 1.467193    | 0.000038           | 0.282361883 | 595            | -14.35719716 | 0.954788974 | -1.692052076 | 1250.6837   | 1624.45006  | 18.92               |
| Sequence 253 | 0.282135               | 0.000027                | 0.001018            | 0.00002                 | 0.02655             | 0.00053                 | 1.467234    | 0.000029           | 0.282113353 | 1127           | -22.98566048 | 0.954788974 | 1.518206139  | 1574.2373   | 1839.699678 | 14.7                |
| Sequence 254 | 0.282161               | 0.000019                | 0.0011758           | 0.0000096               | 0.02687             | 0.00019                 | 1.467267    | 0.000033           | 0.2821377   | 1051           | -22.06623406 | 0.671888537 | 0.656330104  | 1544.4776   | 1833.891023 | 17.29               |
| Sequence 255 | 0.282631               | 0.000024                | 0.001205            | 0.000036                | 0.02609             | 0.00087                 | 1.467261    | 0.000031           | 0.28222121  | 210.2          | -5.445833407 | 0.84870131  | -0.94172659  | 842.04182   | 1277.355724 | 16.45               |
| Sequence 256 | 0.282608               | 0.000029                | 0.001095            | 0.000022                | 0.02725             | 0.00058                 | 1.467273    | 0.00003            | 0.282604478 | 172            | -6.259172163 | 1.025514083 | -2.56302726  | 913.93055   | 1349.989228 | 16.29               |
| Sequence 257 | 0.282755               | 0.000026                | 0.001343            | 0.000026                | 0.03336             | 0.00068                 | 1.467263    | 0.000029           | 0.282751    | 159.3          | -1.060876638 | 0.919426419 | 2.33756187   | 710.73226   | 1029.961834 | 16.44               |
| Sequence 258 | 0.28217                | 0.00002                 | 0.0003747           | 0.0000066               | 0.00962             | 0.00017                 | 1.467246    | 0.000027           | 0.282162297 | 1090           | -21.74797107 | 0.707251092 | 2.413080422  | 1500.0686   | 1754.781456 | 19.36               |
| Sequence 259 | 0.28282                | 0.000024                | 0.001487            | 0.000097                | 0.035               | 0.0024                  | 1.467234    | 0.000027           | 0.28280972  | 369            | 1.237689411  | 0.84870131  | 0.9095564856 | 620.33664   | 764.9428041 | 22.03               |
| Sequence 260 | 0.282638               | 0.000024                | 0.00133             | 0.000011                | 0.03122             | 0.00026                 | 1.467263    | 0.000029           | 0.282631783 | 249.8          | -5.198295525 | 0.84870131  | 0.136264762  | 877.04926   | 1240.110269 | 15.62               |
| Sequence 261 | 0.2828                 | 0.000043                | 0.003266            | 0.000056                | 0.0879              | 0.0017                  | 1.467298    | 0.000039           | 0.282790437 | 156.6          | 0.530438319  | 1.520589847 | 3.672545934  | 681.66985   | 943.0425716 | 13.56               |
| Sequence 262 | 0.28287                | 0.000029                | 0.00183             | 0.000031                | 0.04717             | 0.00089                 | 1.467237    | 0.000026           | 0.282864858 | 150.3          | 3.00581714   | 1.025514083 | 6.164868527  | 553.69123   | 779.3990545 | 15.4                |
| Sequence 263 | 0.282595               | 0.000026                | 0.001528            | 0.000025                | 0.03857             | 0.00069                 | 1.467243    | 0.000028           | 0.282590366 | 162.2          | -6.718885372 | 0.919426419 | -3.280351456 | 943.129     | 1387.619365 | 18.2                |
| Sequence 264 | 0.282149               | 0.000019                | 0.000741            | 0.000087                | 0.0159              | 0.0018                  | 1.467239    | 0.000022           | 0.28213657  | 891            | -22.49058472 | 0.671888537 | -3.005434773 | 1543.4825   | 1937.215858 | 26.1                |
| Sequence 265 | 0.282652               | 0.000019                | 0.000644            | 0.000003                | 0.016328            | 0.000096                | 1.467255    | 0.000029           | 0.282649945 | 165.4          | -4.703219761 | 0.671888537 | -1.101491398 | 842.14516   | 1252.556664 | 17.43               |
| Sequence 266 | 0.282271               | 0.000021                | 0.000733            | 0.000013                | 0.01784             | 0.0003                  | 1.467272    | 0.000027           | 0.282256601 | 1042           | -18.17635306 | 0.742613646 | 4.666699379  | 1374.3384   | 1575.95807  | 18.71               |
| z12-09_1     | 0.282508               | 0.000025                | 0.0007186           | 0.0000068               | 0.01707             | 0.00017                 | 1.467262    | 0.000029           | 0.282505679 | 172.7          | -9.795427622 | 0.884063865 | -6.042564873 | 1044.4588   | 1569.617982 | 15.95               |

|                 |          |          |           |           |          |          |          |          |             |      |              |             |              |           |             |       |
|-----------------|----------|----------|-----------|-----------|----------|----------|----------|----------|-------------|------|--------------|-------------|--------------|-----------|-------------|-------|
| T13-03          |          |          |           |           |          |          |          |          |             |      |              |             |              |           |             |       |
| Las Trancas Fm. |          |          |           |           |          |          |          |          |             |      |              |             |              |           |             |       |
| T13-03          | 0.282209 | 0.000025 | 0.0005356 | 0.0000033 | 0.012602 | 0.000067 | 1.467208 | 0.000037 | 0.282199049 | 986  | -20.36883144 | 0.884063865 | 1.357626797  | 1452.6889 | 1739.145966 | 15.7  |
| _1              | 0.282287 | 0.000021 | 0.0008142 | 0.0000092 | 0.01981  | 0.00024  | 1.467198 | 0.000029 | 0.282276382 | 694  | -17.61055219 | 0.742613646 | -2.494486298 | 1355.0429 | 1751.851222 | 18.04 |
| _2              | 0.282625 | 0.000024 | 0.001271  | 0.000023  | 0.0335   | 0.00066  | 1.467233 | 0.000027 | 0.28262184  | 133  | -5.658008735 | 0.84870131  | -2.816532519 | 894.11328 | 1335.682637 | 16.6  |
| _3              | 0.282125 | 0.000022 | 0.00073   | 0.000032  | 0.0203   | 0.0012   | 1.467227 | 0.000025 | 0.282107303 | 1283 | -23.33928603 | 0.777976201 | 4.853732408  | 1576.1838 | 1754.191162 | 20.23 |
| _4              | 0.282145 | 0.000022 | 0.001061  | 0.000055  | 0.027    | 0.0015   | 1.467223 | 0.000028 | 0.282120576 | 1219 | -22.63203494 | 0.777976201 | 3.866421818  | 1562.0932 | 1765.428637 | 19.44 |
| _5              | 0.282205 | 0.000025 | 0.0006257 | 0.0000096 | 0.0158   | 0.00022  | 1.467223 | 0.000032 | 0.282192232 | 1082 | -20.51028166 | 0.884063865 | 3.292649695  | 1461.6266 | 1693.498926 | 13.35 |
| _6              | 0.28262  | 0.000022 | 0.001608  | 0.000017  | 0.04265  | 0.00042  | 1.467226 | 0.000025 | 0.282616062 | 131  | -5.834821508 | 0.777976201 | -3.065381292 | 909.39135 | 1349.83349  | 18.61 |
| _7              | 0.282633 | 0.000017 | 0.0008837 | 0.0000011 | 0.023225 | 0.000037 | 1.467223 | 0.000023 | 0.282630819 | 132  | -5.375108298 | 0.601163428 | -2.521141907 | 873.72314 | 1316.258452 | 23.45 |
| _8              | 0.282197 | 0.000021 | 0.000587  | 0.000018  | 0.01558  | 0.00047  | 1.467198 | 0.000025 | 0.282186964 | 908  | -20.7931821  | 0.742613646 | -0.835586792 | 1471.1769 | 1815.136199 | 16.01 |
| _9              | 0.282647 | 0.000039 | 0.00396   | 0.00027   | 0.104    | 0.01     | 1.467262 | 0.000029 | 0.282637155 | 133  | -4.880032534 | 1.379139629 | -2.274808392 | 929.68395 | 1301.480391 | 13.71 |
| _10             | 0.28279  | 0.000023 | 0.001234  | 0.00002   | 0.02609  | 0.0005   | 1.467238 | 0.000024 | 0.282786955 | 132  | 0.176812773  | 0.813338756 | 3.001832491  | 658.86106 | 966.404276  | 18.97 |
| _11             | 0.282217 | 0.00002  | 0.000615  | 0.000012  | 0.01592  | 0.00032  | 1.467239 | 0.000027 | 0.282203747 | 1142 | -20.08593101 | 0.707251092 | 5.063754148  | 1444.663  | 1629.87783  | 16.12 |
| _12             | 0.282183 | 0.000025 | 0.0005669 | 0.0000067 | 0.01475  | 0.0002   | 1.467256 | 0.000033 | 0.282171637 | 1063 | -21.28825786 | 0.884063865 | 2.131444337  | 1489.6862 | 1751.180948 | 13.97 |
| _13             | 0.282618 | 0.000026 | 0.001851  | 0.000094  | 0.0484   | 0.0026   | 1.467228 | 0.00003  | 0.282613398 | 133  | -5.905546617 | 0.919426419 | -3.115151185 | 918.26738 | 1354.526864 | 21.2  |
| _14             | 0.282602 | 0.000027 | 0.003172  | 0.000047  | 0.0841   | 0.0011   | 1.46723  | 0.000022 | 0.282594173 | 132  | -6.47134749  | 0.954788974 | -3.817429896 | 976.28963 | 1398.042038 | 22.4  |
| _15             | 0.282617 | 0.000021 | 0.0011167 | 0.0000037 | 0.02927  | 0.00011  | 1.467257 | 0.000029 | 0.282614286 | 130  | -5.940909171 | 0.742613646 | -3.150441212 | 901.74577 | 1354.423982 | 19.7  |
| _16             | 0.282596 | 0.000022 | 0.001018  | 0.000044  | 0.0257   | 0.0011   | 1.467214 | 0.000026 | 0.282593488 | 132  | -6.683522818 | 0.777976201 | -3.84166211  | 928.96489 | 1399.569674 | 21    |
| _17             | 0.282604 | 0.00002  | 0.001076  | 0.000032  | 0.02722  | 0.00099  | 1.467216 | 0.000026 | 0.282601224 | 138  | -6.400622381 | 0.707251092 | -3.43458613  | 919.1121  | 1378.558276 | 19.3  |
| _18             | 0.282612 | 0.000018 | 0.0009118 | 0.000003  | 0.02356  | 0.00011  | 1.467255 | 0.000026 | 0.282609975 | 132  | -6.117721944 | 0.636525983 | -3.266425961 | 903.88286 | 1363.294127 | 20.8  |
| _19             | 0.282601 | 0.000022 | 0.001153  | 0.000054  | 0.0307   | 0.0016   | 1.467237 | 0.000023 | 0.282598392 | 121  | -6.506710045 | 0.777976201 | -3.912754623 | 925.23626 | 1395.519055 | 23.9  |
| _20             | 0.282762 | 0.00002  | 0.001348  | 0.000014  | 0.03091  | 0.00033  | 1.467207 | 0.000028 | 0.282758699 | 131  | -0.813338756 | 0.707251092 | 1.980084054  | 700.84091 | 1030.5179   | 16.96 |
| _21             | 0.282792 | 0.000026 | 0.001553  | 0.000014  | 0.0344   | 0.00038  | 1.467211 | 0.000034 | 0.28278811  | 134  | 0.247537882  | 0.919426419 | 3.087182848  | 661.65837 | 962.5461279 | 17.63 |
| _22             | 0.282768 | 0.000021 | 0.0010432 | 0.0000073 | 0.02331  | 0.00015  | 1.467262 | 0.000024 | 0.282765406 | 133  | -0.601163428 | 0.742613646 | 2.261840736  | 686.66709 | 1014.194375 | 18.43 |
| _23             | 0.282627 | 0.000023 | 0.002137  | 0.000041  | 0.0575   | 0.0012   | 1.467247 | 0.000025 | 0.282621687 | 133  | -5.587283625 | 0.813338756 | -2.821946191 | 912.38016 | 1336.024324 | 25.9  |
| T13-03_1        | 0.282636 | 0.000029 | 0.00113   | 0.000017  | 0.02812  | 0.00049  | 1.467209 | 0.000033 | 0.28263336  | 125  | -5.269020634 | 1.025514083 | -2.586946108 | 875.20867 | 1314.973703 | 14.63 |

|               | 176Hf/177Hf<br>fstnorm | 176Hf/177Hf<br>orr 2SE | 176Lu/177Hf<br>orr | 176Lu/177Hf<br>r 2SE | 176Yb/177Hf<br>orr | 176Yb/177Hf<br>r 2SE | 178Hf/177Hf | 178Hf/177Hf<br>2SE | 176Hf/177Hf | t (age,<br>Ma) | εHf(0)       | ±2 sigma    | εHf(t)       | TDM       | TDM C*      | TotalHfBe<br>am (V) |
|---------------|------------------------|------------------------|--------------------|----------------------|--------------------|----------------------|-------------|--------------------|-------------|----------------|--------------|-------------|--------------|-----------|-------------|---------------------|
| Z12-05        |                        |                        |                    |                      |                    |                      |             |                    |             |                |              |             |              |           |             |                     |
| Zacatecas Fm. |                        |                        |                    |                      |                    |                      |             |                    |             |                |              |             |              |           |             |                     |
| Z12-05        | 0.282172               | 0.000023               | 0.00081            | 0.000011             | 0.02062            | 0.00028              | 1.467211    | 0.000028           | 0.282152658 | 1264           | -21.67724596 | 0.813338756 | 6.029094984  | 1514.4257 | 1665.718015 | 17.57               |
| _1            | 0.282194               | 0.000023               | 0.000799           | 0.000034             | 0.02036            | 0.00093              | 1.467257    | 0.000027           | 0.282180051 | 927            | -20.89926976 | 0.813338756 | -0.650930206 | 1483.515  | 1818.4551   | 15.35               |
| _2            | 0.282109               | 0.000022               | 0.0006387          | 0.000037             | 0.01669            | 0.00015              | 1.467257    | 0.000027           | 0.282094529 | 1200           | -23.9050869  | 0.777976201 | 2.51040488   | 1594.462  | 1835.124765 | 17.26               |
| _3            | 0.282199               | 0.000021               | 0.00078            | 0.000036             | 0.01982            | 0.00013              | 1.467224    | 0.000023           | 0.282182228 | 1136           | -20.72245699 | 0.742613646 | 4.166328279  | 1475.8512 | 1681.327651 | 19.66               |
| _4            | 0.282179               | 0.000025               | 0.002103           | 0.000018             | 0.05544            | 0.00051              | 1.467236    | 0.000032           | 0.282134402 | 1124           | -21.42970808 | 0.884063865 | 2.196281684  | 1557.5592 | 1795.025292 | 17.85               |
| _5            | 0.282177               | 0.000019               | 0.000368           | 0.000015             | 0.00954            | 0.0004               | 1.467222    | 0.00003            | 0.282169869 | 1028           | -21.50043319 | 0.671888537 | 1.275063043  | 1490.221  | 1777.233463 | 16.27               |
| _6            | 0.282045               | 0.00002                | 0.0007408          | 0.0000061            | 0.01924            | 0.00015              | 1.467217    | 0.00003            | 0.282028329 | 1192           | -26.1682904  | 0.707251092 | -0.01888324  | 1686.9972 | 1986.404541 | 18.24               |
| _7            | 0.282127               | 0.000022               | 0.001078           | 0.000026             | 0.0285             | 0.0007               | 1.467233    | 0.000034           | 0.282099814 | 1334           | -23.26856092 | 0.777976201 | 5.751509216  | 1587.8781 | 1738.355672 | 13.5                |
| _8            | 0.282351               | 0.000022               | 0.001395           | 0.000014             | 0.03356            | 0.0003               | 1.467229    | 0.000025           | 0.282339493 | 440            | -15.34734869 | 0.777976201 | -5.959223532 | 1285.678  | 1771.294607 | 17.43               |
| _9            | 0.282215               | 0.00003                | 0.001191           | 0.000022             | 0.02779            | 0.00044              | 1.467253    | 0.000032           | 0.282196107 | 843            | -20.15665612 | 1.060876638 | -1.979994738 | 1469.5242 | 1835.844355 | 16.5                |
| _10           | 0.282621               | 0.000024               | 0.001586           | 0.000025             | 0.03782            | 0.00059              | 1.467221    | 0.000031           | 0.282614246 | 227.6          | -5.799458953 | 0.84870131  | -0.979109043 | 907.42201 | 1293.272684 | 17.6                |
| _11           | 0.28232                | 0.000024               | 0.00114            | 0.000018             | 0.02842            | 0.00043              | 1.467206    | 0.000025           | 0.282295542 | 1137           | -16.44358788 | 0.84870131  | 8.204504536  | 1320.4786 | 1428.858788 | 17.55               |
| _12           | 0.282109               | 0.000022               | 0.0007624          | 0.000031             | 0.019654           | 0.000094             | 1.467225    | 0.000034           | 0.282093311 | 1091           | -23.9050869  | 0.777976201 | -0.009689889 | 1599.6249 | 1906.748002 | 16.48               |
| _13           | 0.282172               | 0.000024               | 0.0000732          | 0.0000022            | 0.002004           | 0.000084             | 1.467284    | 0.000027           | 0.282170602 | 1013           | -21.67724596 | 0.84870131  | 0.961097382  | 1485.7122 | 1785.089071 | 18                  |
| _14           | 0.28254                | 0.00002                | 0.001512           | 0.000021             | 0.03043            | 0.00047              | 1.46723     | 0.000029           | 0.282531138 | 313            | -8.663825875 | 0.707251092 | -2.014879033 | 1021.1335 | 1425.095392 | 18.87               |
| _15           | 0.282182               | 0.000022               | 0.0005229          | 0.0000066            | 0.01353            | 0.00015              | 1.467273    | 0.000029           | 0.282170133 | 1202           | -21.32362042 | 0.777976201 | 5.236680491  | 1489.3548 | 1666.366478 | 17.47               |
| _17           | 0.282279               | 0.000022               | 0.000598           | 0.000019             | 0.01475            | 0.00046              | 1.467237    | 0.000033           | 0.282274    | 446            | -17.89345262 | 0.777976201 | -8.143281178 | 1358.4423 | 1912.392413 | 16.05               |
| _18           | 0.28235                | 0.000021               | 0.000741           | 0.000032             | 0.02073            | 0.00078              | 1.467231    | 0.000028           | 0.282345671 | 312            | -15.38271125 | 0.742613646 | -8.600359792 | 1265.0009 | 1837.5141   | 14.33               |
| _19           | 0.28216                | 0.000031               | 0.000728           | 0.000022             | 0.01844            | 0.00064              | 1.467281    | 0.000039           | 0.282145671 | 1044           | -22.10159662 | 1.096239192 | 0.780119899  | 1527.7596 | 1820.680808 | 17.2                |
| _20           | 0.282846               | 0.000034               | 0.001783           | 0.000035             | 0.0462             | 0.001                | 1.467258    | 0.000034           | 0.282836862 | 273.8          | 2.15711583   | 1.202326856 | 7.928162355  | 587.71857 | 764.2191959 | 15.37               |
| _21           | 0.282088               | 0.000033               | 0.001687           | 0.000018             | 0.04303            | 0.00047              | 1.467242    | 0.000031           | 0.282042774 | 1417           | -24.64770055 | 1.166964302 | 5.624215026  | 1669.0063 | 1811.853281 | 14.51               |
| _22           | 0.282478               | 0.000031               | 0.000773           | 0.000022             | 0.02124            | 0.00061              | 1.467221    | 0.000036           | 0.28247094  | 487            | -10.85630426 | 1.096239192 | -0.25369664  | 1087.8168 | 1449.840927 | 12.85               |
| _23           | 0.282118               | 0.000018               | 0.000495           | 0.000012             | 0.01298            | 0.00036              | 1.467265    | 0.00003            | 0.282106879 | 1190           | -23.58682391 | 0.636525983 | 2.720809015  | 1576.1588 | 1814.137484 | 16.59               |
| _24           | 0.282182               | 0.000022               | 0.0006227          | 0.0000087            | 0.01655            | 0.00025              | 1.467234    | 0.000032           | 0.282169423 | 1071           | -21.32362042 | 0.777976201 | 2.234497803  | 1493.235  | 1751.021178 | 18.23               |
| _25           | 0.282128               | 0.000026               | 0.000891           | 0.000014             | 0.02094            | 0.00031              | 1.467268    | 0.000028           | 0.28210582  | 1317           | -23.23319837 | 0.919426419 | 5.5765819    | 1578.6909 | 1735.861414 | 15.02               |
| _26           | 0.282168               | 0.000021               | 0.001081           | 0.000041             | 0.0286             | 0.0011               | 1.467275    | 0.000029           | 0.282145014 | 1127           | -21.81869618 | 0.742613646 | 2.640633469  | 1530.8474 | 1769.631148 | 16.14               |
| _27           | 0.282164               | 0.00003                | 0.000753           | 0.000015             | 0.01724            | 0.00031              | 1.467201    | 0.000035           | 0.282143582 | 1433           | -21.9601464  | 1.060876638 | 9.566455717  | 1523.2287 | 1578.089766 | 17.4                |
| _28           | 0.282283               | 0.000026               | 0.00071            | 0.00002              | 0.01862            | 0.00054              | 1.46721     | 0.000029           | 0.282269768 | 989            | -17.7520024  | 0.919426419 | 3.931939754  | 1356.8861 | 1580.311785 | 15.81               |
| _29           | 0.282366               | 0.000032               | 0.001029           | 0.00002              | 0.02374            | 0.00048              | 1.467252    | 0.000032           | 0.282356563 | 489            | -14.81691037 | 1.131601747 | -4.257951988 | 1252.2372 | 1702.797189 | 13.09               |
| _30           | 0.2825                 | 0.000027               | 0.000983           | 0.000048             | 0.0249             | 0.0013               | 1.467286    | 0.000029           | 0.282488295 | 634            | -10.07832806 | 0.954788974 | 3.660757405  | 1062.9952 | 1318.334783 | 14.6                |
| _31           | 0.282132               | 0.000018               | 0.00042            | 0.000012             | 0.01088            | 0.0003               | 1.46721     | 0.00003            | 0.282122524 | 1195           | -23.09174815 | 0.636525983 | 3.389287857  | 1553.5199 | 1776.338014 | 18.16               |
| _33           | 0.282648               | 0.000034               | 0.001905           | 0.000047             | 0.0423             | 0.0012               | 1.467246    | 0.000044           | 0.282639366 | 242.2          | -4.844669979 | 1.202326856 | 0.23512227   | 876.31703 | 1227.92971  | 17.14               |
| _34           | 0.281737               | 0.000022               | 0.000846           | 0.000059             | 0.0212             | 0.0015               | 1.467233    | 0.000026           | 0.281718833 | 1138           | -37.05995721 | 0.777976201 | -12.21881104 | 2115.5985 | 2698.374625 | 18.48               |
| _35           | 0.282182               | 0.000026               | 0.000925           | 0.00001              | 0.02356            | 0.00026              | 1.467216    | 0.000026           | 0.282159805 | 1270           | -21.32362042 | 0.919426419 | 6.419338707  | 1505.1129 | 1646.036765 | 17.2                |
| _36           | 0.282196               | 0.000027               | 0.001091           | 0.000017             | 0.02947            | 0.00045              | 1.467247    | 0.000038           | 0.28217278  | 1128           | -20.82854465 | 0.954788974 | 3.647737915  | 1492.173  | 1707.470472 | 14.87               |
| _37           | 0.282179               | 0.000023               | 0.000564           | 0.000033             | 0.01471            | 0.00093              | 1.467272    | 0.000028           | 0.282167781 | 1055           | -21.42970808 | 0.813338756 | 1.81328699   | 1495.0805 | 1764.783828 | 16.71               |
| _38           | 0.282212               | 0.000023               | 0.0003495          | 0.0000096            | 0.00851            | 0.00021              | 1.467227    | 0.000026           | 0.282206336 | 861            | -20.26274378 | 0.813338756 | -1.211145533 | 1441.5684 | 1801.878766 | 18.98               |
| _39           | 0.282123               | 0.000025               | 0.000556           | 0.000015             | 0.01455            | 0.00035              | 1.467228    | 0.00003            | 0.28211723  | 553            | -23.41001114 | 0.884063865 | -11.29704802 | 1571.7907 | 2191.117113 | 20.8                |
| _40           | 0.282331               | 0.000029               | 0.000883           | 0.000012             | 0.02303            | 0.00029              | 1.467231    | 0.000032           | 0.282323351 | 462            | -16.05459978 | 1.025514083 | -6.038275957 | 1296.2162 | 1793.278526 | 22.01               |
| _41           | 0.282192               | 0.000026               | 0.000828           | 0.000051             | 0.0228             | 0.0015               | 1.467268    | 0.000027           | 0.282174299 | 1133           | -20.96999487 | 0.919426419 | 3.815185612  | 1487.4175 | 1700.932524 | 16.4                |
| _42           | 0.282128               | 0.000022               | 0.000704           | 0.000066             | 0.0182             | 0.0017               | 1.467232    | 0.000027           | 0.282113594 | 1085           | -23.23319837 | 0.777976201 | 0.573127211  | 1570.9731 | 1865.718348 | 20.1                |
| _43           | 0.282193               | 0.000023               | 0.000417           | 0.000025             | 0.01113            | 0.00063              | 1.467231    | 0.000033           | 0.28218553  | 951            | -20.93463232 | 0.813338756 | 0.086160533  | 1470.1698 | 1791.192139 | 16.9                |
| _44           | 0.282704               | 0.000034               | 0.001639           | 0.000059             | 0.0441             | 0.0016               | 1.467273    | 0.00004            | 0.282692824 | 364            | -2.864366922 | 1.202326856 | 4.846575417  | 789.68806 | 1031.239848 | 12.28               |
| _45           | 0.282293               | 0.000017               | 0.0004982          | 0.000083             | 0.01274            | 0.00026              | 1.467246    | 0.000024           | 0.282282985 | 1066           | -17.39837686 | 0.601163428 | 6.146505025  | 1335.6164 | 1502.028581 | 22.13               |
| _46           | 0.282584               | 0.000029               | 0.001372           | 0.000042             | 0.0311             | 0.0011               | 1.467231    | 0.00003            | 0.282576927 | 275.4          | -7.107873473 | 1.025514083 | -1.233705456 | 954.82311 | 1346.579248 | 15.73               |
| _47           | 0.282212               |                        |                    |                      |                    |                      |             |                    |             |                |              |             |              |           |             |                     |

|             | 176Hf/177Hf<br>fstnorm | 176Hf/177Hf<br>corr 2SE | 176Lu/177Hf<br>corr | 176Lu/177Hf<br>corr 2SE | 176Yb/177Hf<br>corr | 176Yb/177Hf<br>corr 2SE | 178Hf/177Hf<br>corr | 178Hf/177Hf<br>2SE | 176Hf/177Hf<br>t (age, Ma) | t (age, Ma) | εHf(0)       | ±2 sigma    | εHf(t)       | TDM       | TDM C*      | TotalHfBe<br>am (V) |
|-------------|------------------------|-------------------------|---------------------|-------------------------|---------------------|-------------------------|---------------------|--------------------|----------------------------|-------------|--------------|-------------|--------------|-----------|-------------|---------------------|
| Sequence 12 | 0.282536               | 0.000039                | 0.001496            | 0.000055                | 0.0389              | 0.0012                  | 1.467315            | 0.000036           | 0.282527083                | 318.3       | -8.805276093 | 1.379139629 | -2.040053839 | 1026.3906 | 1430.805664 | 10.82               |
| Sequence 13 | 0.281669               | 0.000027                | 0.00119             | 0.00011                 | 0.0388              | 0.0038                  | 1.467234            | 0.000053           | 0.281631542                | 1660        | -39.46461092 | 0.954788974 | -3.401003594 | 2228.7476 | 2561.593839 | 14.06               |
| Sequence 14 | 0.282415               | 0.000027                | 0.002039            | 0.000047                | 0.0579              | 0.0013                  | 1.467255            | 0.000041           | 0.282402552                | 326         | -13.0841452  | 0.954788974 | -6.275065808 | 1216.093  | 1702.813674 | 19                  |
| Sequence 15 | 0.282604               | 0.000048                | 0.00211             | 0.000086                | 0.0606              | 0.0023                  | 1.467251            | 0.000049           | 0.282591618                | 313.4       | -6.400622381 | 1.69740262  | 0.134248474  | 945.07038 | 1289.873019 | 10.04               |
| Sequence 16 | 0.282285               | 0.000023                | 0.000894            | 0.000013                | 0.02815             | 0.0004                  | 1.46726             | 0.000029           | 0.28226691                 | 1073        | -17.6812773  | 0.813338756 | 5.73556236   | 1360.6744 | 1533.346889 | 21.8                |
| Sequence 17 | 0.281896               | 0.000035                | 0.001302            | 0.000018                | 0.03725             | 0.00053                 | 1.467265            | 0.00005            | 0.281858022                | 1540        | -31.43731103 | 1.237689411 | 1.884436049  | 1920.067  | 2141.307283 | 17                  |
| Sequence 18 | 0.28208                | 0.000037                | 0.001411            | 0.000016                | 0.03802             | 0.00035                 | 1.467308            | 0.000042           | 0.282038734                | 1544        | -24.93060099 | 1.30841452  | 8.388822825  | 1667.9737 | 1739.837083 | 16.9                |
| Sequence 19 | 0.282298               | 0.000023                | 0.00144             | 0.000022                | 0.04407             | 0.0005                  | 1.467272            | 0.000035           | 0.282280092                | 662         | -17.22156409 | 0.813338756 | -3.082890217 | 1362.1552 | 1763.736665 | 21.4                |
| Sequence 20 | 0.28164                | 0.00013                 | 0.001279            | 0.000021                | 0.0526              | 0.0018                  | 1.467279            | 0.00018            | 0.281600947                | 1611        | -40.49012501 | 4.597132097 | -5.611251046 | 2274.101  | 2659.137713 | 3.1                 |
| Sequence 21 | 0.282319               | 0.000038                | 0.001151            | 0.000024                | 0.02795             | 0.00047                 | 1.467251            | 0.00004            | 0.282294218                | 1141        | -16.47895044 | 1.343777074 | 8.248518899  | 1322.2667 | 1429.258906 | 15.72               |
| Sequence 22 | 0.28233                | 0.000031                | 0.000966            | 0.000014                | 0.02685             | 0.0002                  | 1.467316            | 0.000047           | 0.282310122                | 1091        | -16.08996234 | 1.096239192 | 7.676069903  | 1300.4522 | 1425.678014 | 19.4                |
| Sequence 23 | 0.281836               | 0.00004                 | 0.000948            | 0.000028                | 0.02382             | 0.00069                 | 1.467277            | 0.000054           | 0.281808584                | 1527        | -33.55906431 | 1.414502184 | -0.167661971 | 1984.9876 | 2258.1449   | 20.31               |
| Sequence 24 | 0.28228                | 0.000021                | 0.0004509           | 0.000003                | 0.011718            | 0.000088                | 1.467269            | 0.000034           | 0.282271048                | 1053        | -17.85809007 | 0.742613646 | 5.428342194  | 1351.8663 | 1536.85113  | 22.23               |
| Sequence 25 | 0.282003               | 0.000037                | 0.000779            | 0.000014                | 0.01873             | 0.00026                 | 1.467226            | 0.000055           | 0.281981937                | 1429        | -27.65351769 | 1.30841452  | 3.740326289  | 1746.5927 | 1938.688858 | 13.5                |
| Sequence 26 | 0.282057               | 0.000041                | 0.0003304           | 0.0000094               | 0.008               | 0.00021                 | 1.467284            | 0.000074           | 0.282052485                | 727         | -25.74393974 | 1.449864738 | -9.682082531 | 1652.7235 | 2225.010586 | 13.56               |
| Sequence 27 | 0.282792               | 0.000025                | 0.001093            | 0.000026                | 0.02526             | 0.00051                 | 1.467272            | 0.000033           | 0.282786823                | 253.1       | 0.247537882  | 0.884063865 | 5.695562844  | 653.54961 | 890.132593  | 23.03               |
| Sequence 28 | 0.282131               | 0.000021                | 0.0006606           | 0.0000034               | 0.015802            | 0.00006                 | 1.467281            | 0.000025           | 0.282116651                | 1151        | -23.1271107  | 0.742613646 | 2.180445543  | 1565.0577 | 1817.217501 | 25.5                |
| Sequence 33 | 0.281798               | 0.000021                | 0.000816            | 0.000017                | 0.01984             | 0.00047                 | 1.467235            | 0.000033           | 0.28178082                 | 1116        | -34.90284138 | 0.742613646 | -10.52036338 | 2030.309  | 2577.017846 | 16.22               |
| Sequence 34 | 0.282245               | 0.00003                 | 0.000785            | 0.000032                | 0.0232              | 0.001                   | 1.467266            | 0.000021           | 0.282225834                | 1292        | -19.09577948 | 1.060876638 | 9.262707096  | 1412.2855 | 1485.224672 | 19.31               |
| Sequence 35 | 0.282775               | 0.000022                | 0.000889            | 0.000026                | 0.02264             | 0.00056                 | 1.46728             | 0.000037           | 0.282770788                | 253.2       | -0.353625546 | 0.777976201 | 5.130421732  | 673.9929  | 926.1567352 | 22.1                |
| Sequence 36 | 0.28253                | 0.000021                | 0.000597            | 0.000016                | 0.01131             | 0.00023                 | 1.467258            | 0.000028           | 0.282521423                | 764         | -9.017451421 | 0.742613646 | 7.762041579  | 1010.5517 | 1161.745161 | 22.65               |
| Sequence 37 | 0.282179               | 0.000037                | 0.000978            | 0.00003                 | 0.0259              | 0.00064                 | 1.467261            | 0.000046           | 0.282157103                | 1186        | -21.42970808 | 1.30841452  | 4.410591813  | 1511.3894 | 1705.429746 | 15.8                |
| Sequence 38 | 0.282085               | 0.000033                | 0.001284            | 0.000024                | 0.03584             | 0.00081                 | 1.467184            | 0.000045           | 0.282062731                | 921         | -24.75378821 | 1.166964302 | -4.943942658 | 1655.3587 | 2081.171341 | 14.76               |
| Sequence 39 | 0.282275               | 0.000039                | 0.0007421           | 0.0000079               | 0.02241             | 0.00032                 | 1.467272            | 0.000043           | 0.282268711                | 452         | -18.03490284 | 1.379139629 | -8.196246385 | 1369.1208 | 1920.330474 | 24.4                |
| Sequence 40 | 0.282588               | 0.000017                | 0.0002311           | 0.000005                | 0.06061             | 0.00016                 | 1.467193            | 0.000027           | 0.282585665                | 538.5       | -6.966423254 | 0.601163428 | 4.96294668   | 921.0109  | 1161.033885 | 21.91               |
| Sequence 41 | 0.281823               | 0.000021                | 0.0004646           | 0.000003                | 0.01307             | 0.00014                 | 1.467267            | 0.000022           | 0.281813395                | 1096        | -34.01877752 | 0.742613646 | -9.819132268 | 1977.8432 | 2518.397079 | 19.59               |
| Sequence 42 | 0.281798               | 0.000034                | 0.001562            | 0.000038                | 0.0434              | 0.0012                  | 1.467261            | 0.000044           | 0.281756963                | 1389        | -34.90284138 | 1.202326856 | -5.154405956 | 2070.6398 | 2458.201585 | 19.3                |
| Sequence 43 | 0.282167               | 0.000024                | 0.0005091           | 0.0000042               | 0.01508             | 0.00017                 | 1.467263            | 0.000027           | 0.282158383                | 899         | -21.85405874 | 0.84870131  | -2.051764872 | 1509.4383 | 1884.005245 | 22.14               |
| Sequence 44 | 0.282286               | 0.000022                | 0.000506            | 0.000015                | 0.01264             | 0.00031                 | 1.467246            | 0.000063           | 0.282281886                | 433.7       | -17.64591474 | 0.777976201 | -8.139274422 | 1345.5376 | 1902.643711 | 25.3                |
| Sequence 45 | 0.282288               | 0.000026                | 0.00158             | 0.00014                 | 0.0411              | 0.0032                  | 1.467237            | 0.000039           | 0.282268201                | 667         | -17.57518963 | 0.919426419 | -3.391558176 | 1381.4474 | 1786.926767 | 20.3                |
| Sequence 46 | 0.280798               | 0.000028                | 0.001729            | 0.000027                | 0.04671             | 0.00074                 | 1.467255            | 0.000031           | 0.280689806                | 3251        | -70.26539597 | 0.990151529 | 0.262232942  | 3666.7529 | 3588.729256 | 16.61               |
| Sequence 47 | 0.282381               | 0.000025                | 0.001711            | 0.000062                | 0.049               | 0.0017                  | 1.467272            | 0.000036           | 0.282365791                | 474         | -14.28647205 | 0.884063865 | -4.267227913 | 1253.8523 | 1691.731738 | 22.3                |
| Sequence 48 | 0.281358               | 0.000033                | 0.000742            | 0.000041                | 0.018               | 0.001                   | 1.467233            | 0.000088           | 0.281328042                | 2120        | -50.4623654  | 1.166964302 | -3.56703321  | 2625.6175 | 2931.374563 | 16.4                |
| Sequence 49 | 0.282022               | 0.000028                | 0.001119            | 0.000011                | 0.03223             | 0.00057                 | 1.467223            | 0.000043           | 0.282187585                | 685.6       | -20.61636933 | 0.990151529 | -5.828394298 | 1484.8943 | 1953.463935 | 20.81               |
| Sequence 50 | 0.281575               | 0.00003                 | 0.001193            | 0.000023                | 0.03292             | 0.00078                 | 1.467226            | 0.000042           | 0.281562493                | 558.6       | -42.78869106 | 1.060876638 | -30.81288789 | 2358.5701 | 3392.92994  | 14.3                |
| Sequence 51 | 0.281915               | 0.000019                | 0.000341            | 0.000015                | 0.00994             | 0.00047                 | 1.467198            | 0.000025           | 0.281906648                | 1296        | -30.76542249 | 0.671888537 | -1.96620946  | 1846.5952 | 2188.655935 | 19.8                |
| Sequence 53 | 0.282489               | 0.000031                | 0.00068             | 0.000015                | 0.01924             | 0.00037                 | 1.467246            | 0.000046           | 0.282481468                | 590         | -10.46731616 | 1.096239192 | 2.430067762  | 1069.853  | 1361.40021  | 18.2                |
| Artega_1    | 0.281782               | 0.000038                | 0.001363            | 0.000023                | 0.03628             | 0.00065                 | 1.467231            | 0.000053           | 0.281737179                | 1733        | -35.46864225 | 1.343777074 | 2.026726439  | 2081.9866 | 2284.324451 | 14.9                |

23

## Artega Complex

|             |          |          |           |          |          |          |          |          |             |       |              |             |              |           |             |       |
|-------------|----------|----------|-----------|----------|----------|----------|----------|----------|-------------|-------|--------------|-------------|--------------|-----------|-------------|-------|
| Sequence 60 | 0.282718 | 0.000029 | 0.001228  | 0.000048 | 0.0296   | 0.0011   | 1.4674   | 0.000042 | 0.282711614 | 277.8 | -2.369291158 | 1.025514083 | 3.585657876  | 761.13551 | 1043.57555  | 21.4  |
| Sequence 61 | 0.282041 | 0.000032 | 0.000573  | 0.00003  | 0.01516  | 0.00081  | 1.467294 | 0.000044 | 0.282028444 | 1161  | -26.30974062 | 1.131601747 | -0.719589073 | 1685.1186 | 2005.720562 | 12.8  |
| Sequence 62 | 0.282368 | 0.000031 | 0.000736  | 0.000018 | 0.02306  | 0.00054  | 1.467344 | 0.000023 | 0.282359651 | 604.2 | -14.74618526 | 1.096239192 | -1.564484967 | 1239.8287 | 1623.622316 | 17.14 |
| Sequence 63 | 0.281618 | 0.000028 | 0.000861  | 0.000026 | 0.02274  | 0.00076  | 1.467308 | 0.000036 | 0.28158859  | 1799  | -41.26810121 | 0.990151529 | -1.72950571  | 2279.3939 | 2567.588172 | 22.1  |
| Sequence 64 | 0.282725 | 0.000022 | 0.00069   | 0.000012 | 0.01979  | 0.00052  | 1.467297 | 0.000028 | 0.282721697 | 255.8 | -2.121753275 | 0.777976201 | 3.451475159  | 740.54715 | 1034.841298 | 18.85 |
| Sequence 65 | 0.282144 | 0.000022 | 0.0005501 | 0.000003 | 0.016265 | 0.000082 | 1.46737  | 0.000029 | 0.282133351 | 1027  | -22.66739749 | 0.777976201 | -0.041962221 | 1542.6834 | 1858.664798 | 17.68 |
| Sequence 66 | 0.282672 | 0.000027 | 0.000953  | 0.000018 | 0.02382  | 0.00058  | 1.467328 | 0.000026 | 0.282667443 | 255.5 | -3.995968669 | 0.954788974 | 1.525143126  | 820.41983 | 1156.700767 | 17.74 |
| Sequence 67 | 0.282779 | 0.000026 | 0.001243  | 0.000083 | 0.0299   | 0.0021   | 1.467301 | 0.000022 | 0.282773287 | 245.6 | -0.212175328 | 0.919426419 | 5.049309111  | 674.67999 | 925.3435071 | 16.88 |
| Sequence 68 | 0.28254  | 0.000021 | 0.000843  | 0.000015 | 0.02382  | 0.00046  | 1.46726  | 0.000023 | 0.28253624  | 238.4 | -8.663825875 | 0.742613646 | -3.49836215  | 1003.1134 | 1460.51933  | 19.87 |
| Sequence 69 | 0.282098 | 0.000031 | 0.000909  | 0.000063 | 0.0264   | 0.0017   | 1.467271 | 0.000039 | 0.28208956  | 495   | -24.294075   | 1.096239192 | -13.57583965 | 1621.036  | 2287.865628 | 18.7  |
| Sequence 70 | 0.282513 | 0.000022 | 0.000786  | 0.00002  | 0.02083  | 0.00057  | 1.467267 | 0.000023 | 0.282509772 | 219.5 | -9.618614849 | 0.777976201 | -4.855886176 | 1039.3295 | 1531.26551  | 19.01 |
| Sequence 72 | 0.282316 | 0.000026 | 0.002048  | 0.000064 | 0.0603   | 0.0019   | 1.467226 | 0.000025 | 0.282288517 | 714   | -16.5850381  | 0.919426419 | -1.614540075 | 1358.7947 | 1712.382104 | 17.9  |
| Sequence 73 | 0.28215  | 0.000024 | 0.000946  | 0.000088 | 0.02824  | 0.00021  | 1.467219 | 0.000033 | 0.282127902 | 1177  | -22.45522217 | 0.84870131  | 3.170509505  | 1552.4056 | 1775.841591 | 21.11 |
| Sequence 74 | 0.282713 | 0.000031 | 0.0009229 | 0.000042 | 0.02424  | 0.00016  | 1.467287 | 0.00004  | 0.28270857  | 256.5 | -2.546103931 | 1.096239192 | 3.002620945  | 762.02805 | 1063.863661 | 15.89 |
| Sequence 75 | 0.282096 | 0.000028 | 0.00099   | 0.000052 | 0.0274   | 0.0016   | 1.467257 | 0.000029 | 0.282077098 | 1013  | -24.36480011 | 0.990151529 | -2.352967313 | 1627.271  | 1991.702681 | 17.66 |
| Sequence 76 | 0.282108 | 0.000019 | 0.000427  | 0.000043 | 0.01211  | 0.0002   | 1.467256 | 0.000026 | 0.282100586 | 922   | -23.94044946 | 0.671888537 | -3.579904699 | 1587.0725 | 1997.130381 | 19.18 |
| Sequence 77 | 0.282286 | 0.000038 | 0.001791  | 0.000056 | 0.0488   | 0.0017   | 1.467295 | 0.000032 | 0.282278212 | 232.4 | -17.64591474 | 1.343777074 | -12.76129461 | 1392.1583 | 2035.906134 | 14.8  |
| Sequence 78 | 0.282325 | 0.000033 | 0.00224   | 0.00018  | 0.0623   | 0.0047   | 1.467251 | 0.00003  | 0.282304161 | 496   | -16.26677511 | 1.060876638 | -9.56248629  | 1352.9212 | 1814.487114 | 17.7  |
| Sequence 79 | 0.282605 | 0.00003  | 0.000997  | 0.000011 | 0.02542  | 0.00035  | 1.467276 | 0.000033 | 0.282601063 | 211.1 | -6.365259826 | 1.060876638 | -1.813192315 | 915.77961 | 1333.081459 | 20.89 |
| Sequence 80 | 0.282229 | 0.000034 | 0.001107  | 0.000018 | 0.03015  | 0.0006   | 1.467231 | 0.000045 | 0.282219512 | 457.1 | -19.66158035 | 1.202326856 | -9.823688391 | 1446.6911 | 2025.694007 | 18.08 |
| Sequence 81 | 0.282353 | 0.000025 | 0.000438  | 0.000091 | 0.0106   | 0.0021   | 1.46727  | 0.00003  | 0.282350934 | 252.1 | -15.27662358 | 0.884063865 | -9.749556491 | 1250.8865 | 1863.166768 | 18.1  |

|              | 176Hf/177Hf<br>fstnorm | 176Hf/177Hf<br>corr 2SE | 176Lu/177Hf<br>corr | 176Lu/177Hf<br>corr 2SE | 176Yb/177Hf<br>corr | 176Yb/177Hf<br>corr 2SE | 178Hf/177Hf<br>2SE | 176Hf/177Hf<br>t (age, Ma) | $\epsilon\text{Hf}(0)$ | $\pm 2$ sigma | $\epsilon\text{Hf}(t)$ | TDM         | TDM C*       | TotalHfBe<br>am (V) |             |       |
|--------------|------------------------|-------------------------|---------------------|-------------------------|---------------------|-------------------------|--------------------|----------------------------|------------------------|---------------|------------------------|-------------|--------------|---------------------|-------------|-------|
| Sequence 82  | 0.282244               | 0.000023                | 0.001402            | 0.000028                | 0.03724             | 0.00058                 | 1.467266           | 0.000027                   | 0.282231704            | 467.7         | -19.13114203           | 0.813338756 | -9.154908385 | 1436.9341           | 1992.213158 | 17.58 |
| Sequence 83  | 0.282766               | 0.000029                | 0.000526            | 0.000014                | 0.01455             | 0.0003                  | 1.467291           | 0.000036                   | 0.282763738            | 229.8         | -0.671888537           | 1.025514083 | 4.359049272  | 680.14195           | 956.8160351 | 19.65 |
| Sequence 84  | 0.282128               | 0.000042                | 0.001309            | 0.000048                | 0.03217             | 0.00071                 | 1.467265           | 0.000091                   | 0.282099916            | 1137          | -23.23319837           | 1.485227293 | 1.268994862  | 1596.2196           | 1863.087819 | 16.5  |
| Sequence 89  | 0.282248               | 0.000021                | 0.000506            | 0.000029                | 0.01471             | 0.00084                 | 1.467256           | 0.000025                   | 0.282241787            | 653.7         | -18.98969182           | 0.742613646 | -4.626050356 | 1397.8912           | 1853.712013 | 25.7  |
| Sequence 90  | 0.281949               | 0.00003                 | 0.00188             | 0.00012                 | 0.0538              | 0.0036                  | 1.467248           | 0.000028                   | 0.281900005            | 1378          | -29.56309564           | 1.060876638 | -0.331422151 | 1874.9035           | 2151.505419 | 14.48 |
| Sequence 100 | 0.281714               | 0.000053                | 0.001119            | 0.000013                | 0.03008             | 0.00053                 | 1.467248           | 0.00006                    | 0.281672662            | 1943          | -37.87329597           | 1.874215393 | 4.578570733  | 2162.5325           | 2292.336353 | 11.9  |
| Sequence 91  | 0.281728               | 0.000037                | 0.0011149           | 0.0000087               | 0.02942             | 0.00032                 | 1.467289           | 0.000046                   | 0.281722767            | 250.8         | -37.3782202            | 1.30841452  | -32.00447786 | 2142.98             | 3234.954471 | 18.2  |
| Sequence 93  | 0.282363               | 0.000035                | 0.000427            | 0.00001                 | 0.01276             | 0.0004                  | 1.467259           | 0.000079                   | 0.282361036            | 245.8         | -14.92299804           | 1.237689411 | -9.532462126 | 1236.7468           | 1844.748745 | 16    |
| Sequence 95  | 0.282328               | 0.000051                | 0.000823            | 0.000012                | 0.02523             | 0.0003                  | 1.467232           | 0.000067                   | 0.282323856            | 269           | -16.16068745           | 1.803490284 | -10.33106716 | 1298.3453           | 1912.49024  | 13.93 |
| Sequence 102 | 0.282322               | 0.00003                 | 0.000483            | 0.0000095               | 0.01497             | 0.00025                 | 1.467316           | 0.00004                    | 0.282312953            | 994           | -16.37286278           | 1.060876638 | 5.575745184  | 1295.1156           | 1481.075763 | 17.29 |
| Sequence 103 | 0.28266                | 0.00005                 | 0.001097            | 0.000068                | 0.03                | 0.0019                  | 1.467388           | 0.00011                    | 0.282654779            | 254.3         | -4.420319324           | 1.76812773  | 1.050297328  | 840.52737           | 1185.817117 | 22.8  |
| Sequence 104 | 0.28191                | 0.000028                | 0.000497            | 0.000012                | 0.01589             | 0.00041                 | 1.467268           | 0.000031                   | 0.281903133            | 735           | -30.94223527           | 0.990151529 | -14.79220691 | 1860.8902           | 2547.005206 | 16.65 |
| Sequence 105 | 0.282493               | 0.000028                | 0.000799            | 0.00002                 | 0.01857             | 0.0004                  | 1.467201           | 0.000038                   | 0.282489239            | 251.5         | -10.32586594           | 0.990151529 | -4.869338302 | 1067.62             | 1556.911251 | 13.15 |
| Sequence 106 | 0.282127               | 0.000026                | 0.001272            | 0.000032                | 0.03512             | 0.00076                 | 1.467252           | 0.000032                   | 0.282120259            | 283.1         | -23.26856092           | 0.919426419 | -17.22104719 | 1596.0526           | 2351.600032 | 16.02 |
| Sequence 107 | 0.281982               | 0.000029                | 0.0005969           | 0.000004                | 0.016856            | 0.000084                | 1.46721            | 0.000033                   | 0.281967986            | 1243          | -28.39613134           | 1.025514083 | -0.998140373 | 1767.1105           | 2087.178087 | 17.49 |
| Sequence 108 | 0.282913               | 0.000046                | 0.001596            | 0.000063                | 0.0386              | 0.0016                  | 1.467246           | 0.00012                    | 0.282906377            | 221.8         | 4.526406988            | 1.626677511 | 9.227228749  | 488.21349           | 640.2257805 | 17.7  |
| Sequence 109 | 0.282498               | 0.000035                | 0.000738            | 0.000034                | 0.0184              | 0.00087                 | 1.467216           | 0.000082                   | 0.282490586            | 535.4         | -10.14905317           | 1.237689411 | 1.527119459  | 1058.9367           | 1375.533668 | 18.43 |
| Sequence 110 | 0.282832               | 0.000036                | 0.002529            | 0.000078                | 0.07                | 0.0021                  | 1.467272           | 0.000052                   | 0.282816793            | 321.1         | 1.662040066            | 1.273051965 | 8.27467216   | 620.54073           | 779.4460746 | 16.25 |
| Sequence 111 | 0.282389               | 0.000038                | 0.000427            | 0.000016                | 0.01148             | 0.00049                 | 1.467231           | 0.000081                   | 0.28238444             | 569           | -14.00357162           | 1.343777074 | -1.477097914 | 1200.8983           | 1590.696386 | 12.6  |
| Tztizio_1    | 0.282753               | 0.000031                | 0.001432            | 0.000044                | 0.0409              | 0.0013                  | 1.467232           | 0.000075                   | 0.282746932            | 226.5         | -1.131601747           | 1.096239192 | 3.690831174  | 715.29139           | 996.6771573 | 22.92 |

**GTO14-1**  
**Esperanza Fm.**

|        |          |          |            |            |          |          |          |          |             |       |              |             |              |           |             |       |
|--------|----------|----------|------------|------------|----------|----------|----------|----------|-------------|-------|--------------|-------------|--------------|-----------|-------------|-------|
| Gto-14 | 0.282546 | 0.000021 | 0.001303   | 0.00001    | 0.03151  | 0.00026  | 1.467215 | 0.000032 | 0.282539789 | 254.7 | -8.451650547 | 0.742613646 | -3.009430678 | 1006.9338 | 1442.395222 | 15.5  |
| _1     | 0.281181 | 0.00002  | 0.0003857  | 0.0000044  | 0.010283 | 0.000058 | 1.467173 | 0.000026 | 0.281165795 | 2071  | -56.72153756 | 0.707251092 | -10.46679831 | 2838.6387 | 3312.540004 | 15.51 |
| _2     | 0.28237  | 0.000034 | 0.002239   | 0.000038   | 0.0548   | 0.001    | 1.46723  | 0.000031 | 0.282349963 | 477.2 | -14.67546016 | 1.202326856 | -4.755886427 | 1287.8531 | 1724.820264 | 14.18 |
| _4     | 0.282117 | 0.000022 | 0.001194   | 0.000021   | 0.03079  | 0.00046  | 1.467193 | 0.000025 | 0.282082883 | 1509  | -23.62218647 | 0.777976201 | 9.153110871  | 1606.7282 | 1664.304376 | 20    |
| _5     | 0.282476 | 0.000021 | 0.001245   | 0.000032   | 0.03107  | 0.0009   | 1.467161 | 0.000026 | 0.282471165 | 207.6 | -10.92702937 | 0.742613646 | -6.486794362 | 1104.3192 | 1624.507078 | 15.22 |
| _6     | 0.282507 | 0.000026 | 0.001397   | 0.000031   | 0.03885  | 0.00074  | 1.467212 | 0.000026 | 0.282495377 | 443.8 | -9.830790176 | 0.919426419 | -0.356298849 | 1064.8377 | 1422.579981 | 16.14 |
| _7     | 0.282336 | 0.00002  | 0.0006139  | 0.0000045  | 0.015669 | 0.000064 | 1.467207 | 0.000026 | 0.282330848 | 447.6 | -15.87778701 | 0.707251092 | -6.095167229 | 1280.1754 | 1785.68419  | 17.65 |
| _8     | 0.28248  | 0.000032 | 0.001635   | 0.000014   | 0.04247  | 0.00045  | 1.467181 | 0.000029 | 0.282473929 | 198.5 | -10.78557915 | 1.131601747 | -6.591591495 | 1110.2049 | 1624.049255 | 13.63 |
| _9     | 0.282694 | 0.000024 | 0.001171   | 0.000013   | 0.02833  | 0.00027  | 1.467173 | 0.000029 | 0.282688372 | 256.8 | -3.217992468 | 0.84870131  | 2.29466853   | 794.01023 | 1108.977585 | 15.27 |
| _10    | 0.281828 | 0.000023 | 0.001209   | 0.000029   | 0.03107  | 0.00076  | 1.46718  | 0.000025 | 0.281789198 | 1692  | -33.84196474 | 0.813338756 | 2.930464679  | 2009.7596 | 2196.154877 | 18.17 |
| _11    | 0.282236 | 0.000023 | 0.000677   | 0.000023   | 0.01777  | 0.00056  | 1.467187 | 0.000031 | 0.282221191 | 1159  | -19.41404247 | 0.813338756 | 6.068743422  | 1420.7406 | 1580.321736 | 16.53 |
| _12    | 0.282584 | 0.000027 | 0.001039   | 0.000016   | 0.0237   | 0.00043  | 1.467184 | 0.000028 | 0.282571933 | 618.5 | -7.107873473 | 0.954788974 | 6.273982895  | 946.38747 | 1141.061226 | 14.2  |
| _13    | 0.282385 | 0.00002  | 0.001157   | 0.00001    | 0.02957  | 0.00031  | 1.467193 | 0.000032 | 0.282374554 | 481.4 | -14.14502184 | 0.707251092 | -3.791273436 | 1229.7925 | 1667.654127 | 17.41 |
| _14    | 0.282169 | 0.00002  | 0.001137   | 0.000031   | 0.02994  | 0.00077  | 1.467216 | 0.000032 | 0.282140762 | 1314  | -21.78333363 | 0.707251092 | 6.747416432  | 1531.7185 | 1660.286553 | 17.66 |
| _15    | 0.282266 | 0.000021 | 0.001315   | 0.000021   | 0.03156  | 0.00033  | 1.467194 | 0.000025 | 0.282237787 | 1137  | -18.35316583 | 0.742613646 | 6.156935618  | 1402.6635 | 1557.422764 | 18.34 |
| _16    | 0.282291 | 0.000022 | 0.000421   | 0.000011   | 0.01107  | 0.00026  | 1.467184 | 0.000024 | 0.282282754 | 1039  | -17.46910197 | 0.777976201 | 5.525653817  | 1335.6862 | 1519.704447 | 16.01 |
| _17    | 0.282571 | 0.00002  | 0.001056   | 0.000044   | 0.0296   | 0.0013   | 1.467208 | 0.000023 | 0.282562188 | 445.1 | -7.567586682 | 0.707251092 | 2.037771906  | 965.13035 | 1272.631253 | 17.84 |
| _18    | 0.282591 | 0.000023 | 0.001968   | 0.000041   | 0.0492   | 0.0012   | 1.467182 | 0.000025 | 0.282581605 | 255.1 | -6.860335591 | 0.813338756 | -1.520971818 | 960.19514 | 1348.891733 | 14.69 |
| _19    | 0.28253  | 0.000029 | 0.00169    | 0.000013   | 0.04534  | 0.00047  | 1.467245 | 0.000031 | 0.282516502 | 426.1 | -9.017451421 | 1.025514083 | -0.004756228 | 1040.3495 | 1386.619188 | 16.38 |
| _20    | 0.282173 | 0.000022 | 0.000722   | 0.000024   | 0.01794  | 0.0005   | 1.467175 | 0.000031 | 0.28216019  | 942   | -21.64188341 | 0.777976201 | -1.01546768  | 1509.556  | 1852.930808 | 16.12 |
| _21    | 0.282537 | 0.000014 | 0.00009572 | 0.00000019 | 0.002611 | 0.000018 | 1.467223 | 0.000021 | 0.28253576  | 689.5 | -8.769913539 | 0.495075764 | 6.590672616  | 987.84069 | 1177.001672 | 19.83 |
| _22    | 0.282281 | 0.000022 | 0.0006804  | 0.0000074  | 0.01837  | 0.00014  | 1.467197 | 0.000024 | 0.282270194 | 844   | -17.82272751 | 0.777976201 | 0.66743447   | 1358.6036 | 1671.093378 | 16.41 |
| _23    | 0.281823 | 0.000023 | 0.000869   | 0.00002    | 0.02296  | 0.00048  | 1.467216 | 0.000033 | 0.281806607 | 1001  | -34.01877752 | 0.813338756 | -12.21151999 | 1998.7619 | 2592.41969  | 15.03 |
| _24    | 0.281052 | 0.00002  | 0.0009235  | 0.0000032  | 0.02438  | 0.00021  | 1.467161 | 0.000025 | 0.281016238 | 2035  | -61.28330711 | 0.707251092 | -16.6127177  | 3052.7367 | 3655.7788   | 20.09 |
| _25    | 0.282076 | 0.000022 | 0.00201    | 0.000046   | 0.0528   | 0.0013   | 1.467192 | 0.000029 | 0.282017602 | 1534  | -25.0720512  | 0.777976201 | 7.409664753  | 1700.7034 | 1793.021762 | 15.17 |
| _26    | 0.282454 | 0.000022 | 0.001004   | 0.000011   | 0.02442  | 0.00022  | 1.467203 | 0.000024 | 0.282449084 | 261.6 | -11.70500557 | 0.777976201 | -6.065001798 | 1128.1373 | 1639.808449 | 17.5  |
| _27    | 0.282264 | 0.00002  | 0.0007144  | 0.0000028  | 0.017717 | 0.000078 | 1.467215 | 0.000027 | 0.282256482 | 560.7 | -18.42389094 | 0.707251092 | -6.193946523 | 1383.3649 | 1879.456451 | 20.03 |
| _28    | 0.282189 | 0.000016 | 0.000918   | 0.000023   | 0.02171  | 0.00064  | 1.46719  | 0.00003  | 0.282165902 | 1331  | -21.07608254 | 0.565800873 | 8.027075587  | 1495.1089 | 1593.627016 | 19.3  |
| _29    | 0.282049 | 0.000023 | 0.0007197  | 0.0000067  | 0.01874  | 0.00024  | 1.467199 | 0.000034 | 0.282030864 | 1333  | -26.02684018 | 0.813338756 | 3.283099484  | 1680.5572 | 1891.557915 | 13.66 |
| _30    | 0.281916 | 0.000019 | 0.0008719  | 0.0000056  | 0.02298  | 0.00012  | 1.467163 | 0.000024 | 0.281889763 | 1588  | -30.73005994 | 0.671888537 | 4.111403897  | 1870.889  | 2040.966844 | 19.5  |
| _31    | 0.282222 | 0.000021 | 0.000783   | 0.000021   | 0.02059  | 0.00043  | 1.467188 | 0.000027 | 0.282206901 | 1023  | -19.90911823 | 0.742613646 | 2.474302205  | 1444.0988 | 1698.335901 | 16.2  |
| _32    | 0.282245 | 0.00002  | 0.001274   | 0.0000069  | 0.03187  | 0.00035  | 1.467193 | 0.000027 | 0.28221876  | 1092  | -19.09577948 | 0.707251092 | 4.460054349  | 1430.641  | 1628.289642 | 18.63 |
| _33    | 0.282119 | 0.000019 | 0.000688   | 0.000013   | 0.01856  | 0.0004   | 1.467182 | 0.000027 | 0.282103281 | 1210  | -23.55146136 | 0.671888537 | 3.048283333  | 1582.7281 | 1809.425792 | 20    |

|             | 176Hf/177Hf<br>fstnorm | 176Hf/177Hf<br>corr 2SE | 176Lu/177Hf<br>corr | 176Lu/177Hf<br>corr 2SE | 176Yb/177Hf<br>corr | 176Yb/177Hf<br>corr 2SE | 178Hf/177Hf | 178Hf/177Hf<br>2SE | 176Hf/177Hf | t (age,<br>Ma) | εHf(0)       | ±2 sigma    | εHf(t)       | TDM       | TDM C*      | TotalHfBe<br>am (V) |
|-------------|------------------------|-------------------------|---------------------|-------------------------|---------------------|-------------------------|-------------|--------------------|-------------|----------------|--------------|-------------|--------------|-----------|-------------|---------------------|
| Gto-14_1    | 0.282567               | 0.00002                 | 0.001111            | 0.000012                | 0.02835             | 0.00016                 | 1.46718     | 0.000032           | 0.28255349  | 647.4          | -7.709036901 | 0.707251092 | 6.270920424  | 972.18367 | 1164.030765 | 16.6                |
| CH14-1      |                        |                         |                     |                         |                     |                         |             |                    |             |                |              |             |              |           |             |                     |
| Charcas Fm. |                        |                         |                     |                         |                     |                         |             |                    |             |                |              |             |              |           |             |                     |
| CH-14       | 0.282694               | 0.000023                | 0.001826            | 0.000066                | 0.0449              | 0.002                   | 1.467183    | 0.000031           | 0.282685444 | 250.4          | -3.217992468 | 0.813338756 | 2.048285449  | 808.12334 | 1119.580408 | 14.8                |
| _41         | 0.282514               | 0.000024                | 0.001518            | 0.000029                | 0.03703             | 0.00063                 | 1.467219    | 0.000027           | 0.282488364 | 897            | -9.583252294 | 0.84870131  | 9.595470807  | 1058.3306 | 1151.061664 | 16.69               |
| _42         | 0.282772               | 0.000024                | 0.001284            | 0.00004                 | 0.02877             | 0.00084                 | 1.467177    | 0.00003            | 0.282764911 | 294.9          | -0.45971321  | 0.84870131  | 5.853357636  | 685.39474 | 912.9682421 | 15.77               |
| _43         | 0.281909               | 0.000022                | 0.0013087           | 0.0000073               | 0.03527             | 0.00028                 | 1.467175    | 0.000031           | 0.281871329 | 1520           | -30.97759782 | 0.777976201 | 1.898458243  | 1902.293  | 2124.713249 | 16.86               |
| _44         | 0.282426               | 0.000021                | 0.000209            | 0.000012                | 0.00593             | 0.00031                 | 1.467172    | 0.000028           | 0.282423965 | 519            | -12.6951571  | 0.742613646 | -1.199385895 | 1143.3477 | 1534.272891 | 15.6                |
| _45         | 0.282222               | 0.000018                | 0.0001183           | 0.0000056               | 0.00337             | 0.00013                 | 1.467188    | 0.000028           | 0.282220049 | 876            | -19.90911823 | 0.636525983 | -0.38645879  | 1419.3536 | 1762.064739 | 16.23               |
| _46         | 0.282834               | 0.000016                | 0.0004177           | 0.0000046               | 0.00831             | 0.0001                  | 1.46717     | 0.000023           | 0.282831878 | 271.4          | 1.732765175  | 0.565800873 | 7.698218357  | 583.44542 | 776.9889437 | 21.19               |
| _47         | 0.282584               | 0.000027                | 0.002413            | 0.000015                | 0.05782             | 0.00049                 | 1.46725     | 0.000033           | 0.282571611 | 274.3          | -7.107873473 | 0.954788974 | -1.44636448  | 982.19166 | 1359.136111 | 15.19               |
| _48         | 0.282749               | 0.000026                | 0.001558            | 0.00004                 | 0.03644             | 0.00084                 | 1.467214    | 0.000026           | 0.282741121 | 270.2          | -1.273051965 | 0.919426419 | 4.460079071  | 723.45897 | 982.1069808 | 15.09               |
| _49         | 0.282208               | 0.000018                | 0.0006009           | 0.000002                | 0.014812            | 0.000079                | 1.467214    | 0.000024           | 0.282196459 | 1019           | -20.404194   | 0.636525983 | 2.013501913  | 1456.5437 | 1724.018904 | 21.27               |
| _50         | 0.282936               | 0.000021                | 0.001167            | 0.000022                | 0.02477             | 0.00058                 | 1.467223    | 0.000034           | 0.282929189 | 311.7          | 5.339745743  | 0.742613646 | 12.04194934  | 449.81343 | 531.2925342 | 18.89               |
| _51         | 0.282212               | 0.000019                | 0.0005889           | 0.0000059               | 0.01508             | 0.00011                 | 1.467214    | 0.000026           | 0.282198882 | 1180           | -20.26274378 | 0.671888537 | 5.755438926  | 1450.5731 | 1616.530462 | 17.48               |
| _52         | 0.282274               | 0.000023                | 0.000575            | 0.000016                | 0.01629             | 0.00039                 | 1.467193    | 0.000032           | 0.282262179 | 1090           | -18.0702654  | 0.813338756 | 5.95381496   | 1364.5292 | 1533.065122 | 13.34               |
| _53         | 0.282953               | 0.000021                | 0.000697            | 0.000017                | 0.01531             | 0.00032                 | 1.4672      | 0.000032           | 0.282949886 | 238.8          | 5.940909171  | 0.742613646 | 11.14590386  | 420.27278 | 530.8940722 | 14.86               |
| _54         | 0.282908               | 0.000021                | 0.001136            | 0.000026                | 0.02666             | 0.00062                 | 1.467206    | 0.000028           | 0.282902638 | 252.2          | 4.349594215  | 0.742613646 | 9.773310904  | 489.33578 | 629.3399679 | 17.36               |
| _55         | 0.282645               | 0.000024                | 0.000543            | 0.00003                 | 0.01199             | 0.00061                 | 1.467174    | 0.000026           | 0.282642018 | 293.3          | -4.950757643 | 0.84870131  | 1.468989338  | 849.21465 | 1189.808728 | 14.28               |
| _56         | 0.282626               | 0.000023                | 0.0012907           | 0.0000098               | 0.03137             | 0.00028                 | 1.467225    | 0.000028           | 0.282619841 | 255            | -5.62264618  | 0.813338756 | -0.170315326 | 893.16452 | 1263.542379 | 16.5                |
| _57         | 0.282879               | 0.000022                | 0.000929            | 0.000015                | 0.01947             | 0.00043                 | 1.467209    | 0.000028           | 0.28287446  | 261.1          | 3.324080132  | 0.777976201 | 8.974970614  | 527.70736 | 687.3883817 | 16.22               |
| _58         | 0.282386               | 0.000023                | 0.001702            | 0.000052                | 0.0407              | 0.0013                  | 1.467221    | 0.00003            | 0.282371105 | 466.7          | -14.10965928 | 0.813338756 | -4.242582306 | 1246.419  | 1684.519811 | 16.62               |
| _59         | 0.282743               | 0.000023                | 0.001461            | 0.000038                | 0.03246             | 0.0008                  | 1.467191    | 0.000031           | 0.282734564 | 308.4          | -1.485227293 | 0.813338756 | 5.081004497  | 730.15488 | 972.6698599 | 15.47               |
| _60         | 0.282061               | 0.000022                | 0.0005742           | 0.0000075               | 0.01479             | 0.00015                 | 1.467184    | 0.000026           | 0.282048823 | 1124           | -25.60248952 | 0.777976201 | -0.8376559   | 1657.721  | 1984.122763 | 16.2                |
| _61         | 0.282777               | 0.000025                | 0.001666            | 0.000035                | 0.0413              | 0.00085                 | 1.4672      | 0.000032           | 0.282768599 | 269.4          | -0.282900437 | 0.884063865 | 5.414527638  | 685.279   | 920.8226307 | 16.24               |
| _62         | 0.282026               | 0.00002                 | 0.001024            | 0.00007                 | 0.0265              | 0.0018                  | 1.467164    | 0.000028           | 0.282000137 | 1336           | -26.84017893 | 0.707251092 | 2.261701463  | 1725.9501 | 1957.506698 | 15.92               |
| _63         | 0.282706               | 0.00002                 | 0.000766            | 0.000026                | 0.01763             | 0.00063                 | 1.467205    | 0.000027           | 0.282702537 | 241.6          | -2.793641813 | 0.707251092 | 2.456822304  | 768.69504 | 1086.803026 | 17.38               |
| _64         | 0.282705               | 0.000018                | 0.001015            | 0.000015                | 0.02492             | 0.00041                 | 1.467223    | 0.000027           | 0.282698937 | 319            | -2.829004367 | 0.636525983 | 4.057073293  | 775.19021 | 1045.988623 | 19.66               |
| _65         | 0.282318               | 0.000022                | 0.0005287           | 0.0000058               | 0.01346             | 0.00017                 | 1.46719     | 0.000028           | 0.282312678 | 536.5          | -16.51431299 | 0.777976201 | -4.747027344 | 1302.1813 | 1770.282927 | 17.3                |
| _66         | 0.282693               | 0.00002                 | 0.000907            | 0.000022                | 0.01967             | 0.00044                 | 1.467175    | 0.000031           | 0.282688607 | 258.8          | -3.253355022 | 0.707251092 | 2.347591157  | 789.86799 | 1107.189404 | 16.39               |
| _67         | 0.282551               | 0.000018                | 0.00052             | 0.00002                 | 0.01057             | 0.00045                 | 1.467168    | 0.000024           | 0.282548171 | 290.6          | -8.274837774 | 0.636525983 | -1.912109602 | 979.36897 | 1401.187516 | 18.1                |
| _68         | 0.282767               | 0.00002                 | 0.0006416           | 0.0000067               | 0.01489             | 0.00018                 | 1.467203    | 0.000027           | 0.282763784 | 267.8          | -0.636525983 | 0.707251092 | 5.2084312    | 680.81044 | 932.6688297 | 17.89               |
| _69         | 0.282484               | 0.000021                | 0.001051            | 0.000015                | 0.02514             | 0.00058                 | 1.467207    | 0.000021           | 0.282478947 | 256.9          | -10.64412893 | 0.742613646 | -5.113145773 | 1087.4005 | 1576.413624 | 18.88               |
| _70         | 0.282102               | 0.000023                | 0.0008569           | 0.0000093               | 0.02277             | 0.0004                  | 1.467161    | 0.000027           | 0.282080603 | 1321           | -24.15262479 | 0.813338756 | 4.773467523  | 1613.283  | 1789.170315 | 14.55               |
| _71         | 0.282161               | 0.000024                | 0.00139             | 0.00001                 | 0.03967             | 0.00041                 | 1.467221    | 0.000029           | 0.282124163 | 1401           | -22.06623406 | 0.84870131  | 8.145656933  | 1553.2881 | 1641.663742 | 14.38               |
| _72         | 0.282606               | 0.000021                | 0.0008619           | 0.0000066               | 0.01838             | 0.00013                 | 1.467233    | 0.000025           | 0.282602423 | 221.8          | -6.329897272 | 0.742613646 | -1.526655723 | 911.10885 | 1323.325218 | 16.89               |
| _73         | 0.282363               | 0.000017                | 0.000733            | 0.0000072               | 0.01705             | 0.00019                 | 1.467222    | 0.000028           | 0.282359069 | 286.5          | -14.92299804 | 0.601163428 | -8.695000156 | 1246.6779 | 1823.763114 | 19.71               |
| _74         | 0.282125               | 0.000016                | 0.000203            | 0.000025                | 0.00572             | 0.00066                 | 1.467216    | 0.000028           | 0.282121421 | 936            | -23.33928603 | 0.565800873 | -2.525019402 | 1554.7499 | 1942.359443 | 17.63               |
| _75         | 0.282874               | 0.00002                 | 0.000575            | 0.000027                | 0.01257             | 0.00059                 | 1.467182    | 0.000023           | 0.282871274 | 253.3          | 3.147267359  | 0.707251092 | 8.688125144  | 529.80362 | 699.5466479 | 18.12               |
| _76         | 0.281213               | 0.00002                 | 0.0006622           | 0.000008                | 0.01754             | 0.00018                 | 1.46722     | 0.000032           | 0.281184035 | 2293           | -55.58993582 | 0.707251092 | -4.667512355 | 2815.8169 | 3133.65737  | 15.12               |
| _77         | 0.282882               | 0.000023                | 0.001101            | 0.000038                | 0.02268             | 0.00077                 | 1.467211    | 0.000032           | 0.282876256 | 278.7          | 3.430167795  | 0.813338756 | 9.43151246   | 525.86304 | 672.1334349 | 15.58               |
| _78         | 0.282216               | 0.00002                 | 0.000521            | 0.0000038               | 0.013907            | 0.000055                | 1.467242    | 0.000031           | 0.282206281 | 990            | -20.12129356 | 0.707251092 | 1.704522006  | 1442.5022 | 1720.590242 | 15.58               |
| _79         | 0.28218                | 0.000019                | 0.000489            | 0.000037                | 0.01401             | 0.00096                 | 1.467206    | 0.000029           | 0.282170719 | 1007           | -21.39434553 | 0.671888537 | 0.829293633  | 1490.7895 | 1788.620642 | 15.29               |
| _80         | 0.282355               | 0.000023                | 0.001964            | 0.000054                | 0.0525              | 0.0014                  | 1.467169    | 0.000024           | 0.282337368 | 478.7          | -15.20589847 | 0.813338756 | -5.168141982 | 1299.7742 | 1751.788883 | 19.6                |
| _81         | 0.282724               | 0.000018                | 0.0007381           | 0.0000053               | 0.01729             | 0.00019                 | 1.467213    | 0.000026           | 0.282720868 | 226.8          | -2.15711583  | 0.636525983 | 2.775379639  | 742.88903 | 1055.014723 | 17.13               |
| _82         | 0.282082               | 0.000024                | 0.000577            | 0.000011                | 0.01414             | 0.00033                 | 1.467182    | 0.000031           | 0.282070401 | 1066           | -24.85987588 | 0.84870131  | -1.38900654  | 1629.002  | 1973.093089 | 13.37               |
| _83         | 0.282061               | 0.000024                | 0.000609            | 0.0000027               | 0.018232            | 0.000059                | 1.467141    | 0.000031           | 0.282046853 | 1230           | -25.60248952 | 0.84870131  | 1.50         |           |             |                     |

|                | 176Hf/177Hf<br>fstnorm | 176Hf/177Hf<br>corr 2SE | 176Lu/177Hf<br>corr | 176Lu/177Hf<br>corr 2SE | 176Yb/177Hf<br>corr | 176Yb/177Hf<br>corr 2SE | 178Hf/177Hf | 178Hf/177Hf<br>2SE | 176Hf/177Hf | t (age,<br>Ma) | εHf(0)       | ±2 sigma    | εHf(t)       | TDM       | TDM C*      | TotalHfBe<br>am (V) |
|----------------|------------------------|-------------------------|---------------------|-------------------------|---------------------|-------------------------|-------------|--------------------|-------------|----------------|--------------|-------------|--------------|-----------|-------------|---------------------|
| _92            | 0.282889               | 0.000028                | 0.001967            | 0.000061                | 0.0505              | 0.0015                  | 1.467184    | 0.000039           | 0.282883999 | 136            | 3.677705677  | 0.990151529 | 6.523605101  | 528.11093 | 745.2650698 | 13.3                |
| _93            | 0.28266                | 0.000022                | 0.0015058           | 0.000006                | 0.04179             | 0.00018                 | 1.467195    | 0.000031           | 0.282655439 | 162            | -4.420319324 | 0.777976201 | -0.982826774 | 849.76721 | 1242.407295 | 16.72               |
| _94            | 0.282906               | 0.000003                | 0.002077            | 0.000082                | 0.0555              | 0.0021                  | 1.46719     | 0.000036           | 0.28290058  | 139.6          | 4.278869106  | 1.060876638 | 7.190254548  | 504.87512 | 705.5411107 | 14.03               |
| _95            | 0.282615               | 0.000024                | 0.0018807           | 0.0000098               | 0.04399             | 0.00014                 | 1.467198    | 0.000026           | 0.282607541 | 212            | -6.01163428  | 0.84870131  | -1.563937096 | 923.33281 | 1318.049752 | 16.62               |
| _96            | 0.281992               | 0.000024                | 0.001004            | 0.000019                | 0.0246              | 0.00044                 | 1.467226    | 0.000031           | 0.281964199 | 1463           | -28.04250579 | 0.84870131  | 3.888701639  | 1772.1755 | 1956.250014 | 13.59               |
| _97            | 0.28299                | 0.000028                | 0.000674            | 0.0000098               | 0.01725             | 0.00034                 | 1.467226    | 0.000037           | 0.28298827  | 137.3          | 7.249323691  | 0.990151529 | 10.24095341  | 367.87139 | 508.5440329 | 20.42               |
| _98            | 0.283008               | 0.000021                | 0.001103            | 0.000012                | 0.02881             | 0.00036                 | 1.467227    | 0.000029           | 0.283005237 | 134            | 7.885849674  | 0.742613646 | 10.76764161  | 346.41125 | 472.1623978 | 17.94               |
| _99            | 0.282453               | 0.000026                | 0.001587            | 0.000038                | 0.04024             | 0.00098                 | 1.467217    | 0.000032           | 0.282448083 | 165.7          | -11.74036812 | 0.919426419 | -8.235810498 | 1147.2378 | 1701.855068 | 13.26               |
| _100           | 0.282731               | 0.00004                 | 0.001409            | 0.000017                | 0.03158             | 0.00036                 | 1.467181    | 0.000047           | 0.282727634 | 127.8          | -1.909577948 | 1.414502184 | 0.810041954  | 746.27339 | 1102.238708 | 9.36                |
| _101           | 0.282363               | 0.000024                | 0.001373            | 0.000028                | 0.03592             | 0.00067                 | 1.467185    | 0.000029           | 0.282356208 | 264.3          | -14.92299804 | 0.84870131  | -9.291083718 | 1267.9733 | 1843.912997 | 15.72               |
| _102           | 0.282521               | 0.000034                | 0.001553            | 0.000021                | 0.04054             | 0.00046                 | 1.467183    | 0.000034           | 0.282516331 | 160.8          | -9.335714412 | 1.202326856 | -5.930508974 | 1049.3489 | 1553.369895 | 11.8                |
| _103           | 0.282969               | 0.00002                 | 0.0006712           | 0.0000073               | 0.01608             | 0.0002                  | 1.467215    | 0.000026           | 0.282967398 | 127.7          | 6.506710045  | 0.707251092 | 9.288882239  | 397.44471 | 561.9525703 | 16.48               |
| _104           | 0.282986               | 0.000032                | 0.00251             | 0.00011                 | 0.0647              | 0.0027                  | 1.467192    | 0.00003            | 0.282979417 | 140.3          | 7.107873473  | 1.131601747 | 9.994589818  | 392.54887 | 526.7047021 | 14.39               |
| _105           | 0.281962               | 0.000021                | 0.0004434           | 0.0000031               | 0.011654            | 0.000074                | 1.467191    | 0.000028           | 0.281956494 | 661            | -29.10338243 | 0.742613646 | -14.56552403 | 1787.3837 | 2476.314976 | 17.53               |
| _106           | 0.282652               | 0.000027                | 0.001065            | 0.000036                | 0.02611             | 0.00085                 | 1.467166    | 0.000032           | 0.28264943  | 129.1          | -4.703219761 | 0.954788974 | -1.927331085 | 851.10986 | 1276.497325 | 13.3                |
| _107           | 0.282705               | 0.000021                | 0.0010296           | 0.0000609               | 0.02505             | 0.00016                 | 1.467225    | 0.000035           | 0.282700202 | 249            | -2.829004367 | 0.742613646 | 2.539261417  | 775.49088 | 1087.369864 | 12.52               |
| SL-45_1        | 0.282127               | 0.000026                | 0.000982            | 0.000015                | 0.02532             | 0.00039                 | 1.467183    | 0.000046           | 0.282108176 | 1017           | -23.26856092 | 0.919426419 | -1.160844886 | 1583.8638 | 1920.597807 | 13.68               |
| SL-67          |                        |                         |                     |                         |                     |                         |             |                    |             |                |              |             |              |           |             |                     |
| Cuestecita Fm. |                        |                         |                     |                         |                     |                         |             |                    |             |                |              |             |              |           |             |                     |
| SL-67          | 0.282562               | 0.000044                | 0.002843            | 0.000028                | 0.07589             | 0.00091                 | 1.467251    | 0.000055           | 0.28255333  | 163.1          | -7.885849674 | 1.555952402 | -4.57049203  | 1026.4809 | 1469.599222 | 11.71               |
| _108           | 0.282805               | 0.000023                | 0.001847            | 0.000043                | 0.0496              | 0.0012                  | 1.467197    | 0.000033           | 0.282800007 | 144.6          | 0.707251092  | 0.813338756 | 3.74393359   | 648.13042 | 929.097422  | 16.43               |
| _109           | 0.28279                | 0.000026                | 0.001249            | 0.000021                | 0.02968             | 0.00059                 | 1.467197    | 0.000031           | 0.282787005 | 128.3          | 0.176812773  | 0.919426419 | 2.921256381  | 659.12545 | 968.6282062 | 15.09               |
| _110           | 0.282196               | 0.000032                | 0.000879            | 0.000026                | 0.0235              | 0.00069                 | 1.467183    | 0.000041           | 0.282177175 | 1135           | -20.82854465 | 1.131601747 | 3.962603017  | 1483.8576 | 1693.285731 | 11.19               |
| _111           | 0.282603               | 0.000023                | 0.001262            | 0.000021                | 0.03346             | 0.00057                 | 1.467202    | 0.000027           | 0.282597964 | 213.3          | -6.435984936 | 0.813338756 | -1.873804755 | 925.09343 | 1338.618217 | 17.89               |
| _112           | 0.283008               | 0.000026                | 0.000859            | 0.000041                | 0.0222              | 0.001                   | 1.46719     | 0.000028           | 0.283006017 | 123.5          | 7.885849674  | 0.919426419 | 10.56143056  | 344.16695 | 477.0802039 | 14.32               |
| _113           | 0.282883               | 0.000031                | 0.003883            | 0.000038                | 0.10444             | 0.00072                 | 1.467191    | 0.000039           | 0.282873513 | 130.7          | 3.46553035   | 1.096239192 | 6.034711418  | 566.48715 | 772.2874533 | 13.33               |
| _114           | 0.282208               | 0.000021                | 0.00093             | 0.000017                | 0.02495             | 0.0004                  | 1.467234    | 0.000024           | 0.2821881   | 1134           | -20.404194   | 0.742613646 | 4.327216041  | 1469.1627 | 1669.685033 | 19.09               |
| _115           | 0.282539               | 0.000026                | 0.001289            | 0.000024                | 0.03264             | 0.00064                 | 1.467164    | 0.000035           | 0.282534417 | 190.1          | -8.699188429 | 0.919426419 | -4.638666664 | 1016.4715 | 1494.817245 | 13.18               |
| _116           | 0.282398               | 0.000017                | 0.0004314           | 0.0000082               | 0.011               | 0.00017                 | 1.467195    | 0.00003            | 0.282393403 | 567.7          | -13.68530863 | 0.601163428 | -1.188899263 | 1188.6198 | 1571.593552 | 18.01               |
| _117           | 0.282166               | 0.000023                | 0.000931            | 0.000077                | 0.0269              | 0.0022                  | 1.467213    | 0.00003            | 0.282156075 | 568            | -21.88942129 | 0.813338756 | -9.585358182 | 1527.584  | 2096.355713 | 17.39               |
| _118           | 0.282113               | 0.000024                | 0.000784            | 0.000017                | 0.02068             | 0.00036                 | 1.467223    | 0.000033           | 0.282092673 | 1371           | -23.76363669 | 0.84870131  | 6.343058976  | 1595.0016 | 1730.631367 | 14.01               |
| _119           | 0.283015               | 0.000028                | 0.0010874           | 0.0000335               | 0.02447             | 0.00012                 | 1.467171    | 0.000028           | 0.283012496 | 123.2          | 8.133387556  | 0.990151529 | 10.78392325  | 336.28228 | 462.5708678 | 12.83               |
| _120           | 0.282765               | 0.000024                | 0.001077            | 0.000018                | 0.02701             | 0.00049                 | 1.467218    | 0.000027           | 0.282762256 | 136.3          | -0.707251092 | 0.84870131  | 2.22382347   | 691.53518 | 1019.189468 | 15.8                |
| _121           | 0.282692               | 0.000028                | 0.002598            | 0.000043                | 0.0654              | 0.001                   | 1.4672      | 0.00003            | 0.282676764 | 313.2          | -3.288717577 | 0.990151529 | 3.142862705  | 828.36163 | 1099.401516 | 15.05               |
| _122           | 0.28226                | 0.000017                | 0.000332            | 0.000017                | 0.01011             | 0.00048                 | 1.467202    | 0.000028           | 0.282257146 | 458.4          | -18.56534116 | 0.601163428 | -8.462404053 | 1375.1305 | 1941.873034 | 19.42               |
| _123           | 0.282125               | 0.000018                | 0.0006502           | 0.0000061               | 0.0174              | 0.00027                 | 1.467179    | 0.000026           | 0.282110033 | 1219           | -23.33928603 | 0.636525983 | 3.492553673  | 1572.9003 | 1788.774822 | 16.13               |
| _124           | 0.283031               | 0.000034                | 0.000845            | 0.00002                 | 0.01773             | 0.00048                 | 1.467183    | 0.000043           | 0.283029081 | 121.5          | 8.699188429  | 1.202326856 | 11.33272334  | 311.436   | 426.0049541 | 8.89                |
| _125           | 0.282618               | 0.000023                | 0.002535            | 0.000027                | 0.06821             | 0.00083                 | 1.467187    | 0.000026           | 0.282610293 | 162.6          | -5.905546617 | 0.813338756 | -2.566529523 | 935.62806 | 1342.904498 | 20.63               |
| _126           | 0.283101               | 0.000027                | 0.00349             | 0.00016                 | 0.095               | 0.0052                  | 1.467196    | 0.000031           | 0.283092179 | 135.2          | 11.17456725  | 0.954788974 | 13.86979387  | 228.12188 | 273.7692403 | 16.8                |
| _127           | 0.282613               | 0.000031                | 0.000943            | 0.000073                | 0.0242              | 0.0019                  | 1.467198    | 0.00003            | 0.28260926  | 212            | -6.08235939  | 1.096239192 | -1.50312697  | 903.22341 | 1314.210949 | 13.87               |
| _128           | 0.282883               | 0.000033                | 0.000675            | 0.000061                | 0.0179              | 0.0018                  | 1.467092    | 0.000046           | 0.282881286 | 135.8          | 3.46553035   | 1.166964301 | 6.423193785  | 518.54749 | 751.5150859 | 10.3                |
| _129           | 0.282496               | 0.000026                | 0.000789            | 0.000026                | 0.02032             | 0.00084                 | 1.467183    | 0.000034           | 0.282488512 | 505.9          | -10.21977828 | 0.919426419 | 0.792062494  | 1063.1508 | 1398.765413 | 13.14               |
| _130           | 0.281233               | 0.00002                 | 0.0006              | 0.000014                | 0.0165              | 0.0003                  | 1.467183    | 0.000026           | 0.28120937  | 2069           | -54.88268473 | 0.707251092 | -8.964914281 | 2784.4057 | 3219.95259  | 17.89               |
| _131           | 0.282574               | 0.000022                | 0.0023497           | 0.0000059               | 0.06299             | 0.00042                 | 1.467187    | 0.000027           | 0.282553702 | 460.7          | -7.461499019 | 0.777976201 | 2.086818783  | 995.06878 | 1281.749632 | 18.76               |
| _132           | 0.282915               | 0.000019                | 0.0006646           | 0.0000011               | 0.016351            | 0.000095                | 1.467235    | 0.000032           | 0.282911811 | 256.4          | 4.597132097  | 0.671888537 | 10.19161719  | 473.40286 | 605.9110225 | 16.91               |
| _133           | 0.282941               | 0.000024                | 0.000705            | 0.000013                | 0.01791             | 0.00031                 | 1.467233    | 0.000028           | 0.282939254 | 132.5          | 5.516558516  | 0.84870131  | 8.400214694  | 437.27679 | 622.6144061 | 14.81               |
| _134           | 0.282547               | 0.000039                | 0.002487            | 0.000023                | 0.06474             | 0.00042                 | 1.467169    | 0.000051           | 0.282539406 | 163.3          | -8.416287993 | 1.379139629 | -5.058595545 | 1038.348  | 1500.47336  | 11.08               |
| _135           | 0.282536               | 0.000029                | 0.001566            | 0.000069                | 0.037               | 0.0017                  | 1.467207    | 0.000033           | 0.282525992 | 341.2          | -8.805276093 | 1.025514083 | -1.567239882 | 1028.3226 | 1418.854721 | 14.16               |
| _136           | 0.282528               | 0.000026                | 0.001491            | 0.000013                | 0.0384              | 0.00038                 | 1.467143    | 0.000028           | 0.282523366 | 166.2          | -9.08817653  | 0.919426419 | -5.561489677 | 1037.6409 | 1534.349647 | 13.31               |
| _137           | 0.282123               | 0.000022                | 0.000732            | 0.000031                | 0.01877             | 0.00063                 | 1.467211    | 0.000023           | 0.282108174 | 1074           | -23.41001114 | 0.777976201 | 0.131414722  | 1579.0276 | 1884.644129 | 18.64               |
| _138           | 0.282539               | 0.000028                | 0.001641            | 0.000026                | 0.03912             | 0.00072                 | 1.467228    | 0.000028           | 0.282532227 | 220.6          | -8.699188429 | 0.990151529 | -4.03692374  | 1026.1124 | 1480.603034 | 15.385              |
| _139           | 0.282993               | 0.000021                | 0.000954            | 0.000026                | 0.02495             | 0.00077                 | 1.467215    | 0.00003            | 0.282990655 | 131.5          | 7.355411355  | 0.742613646 | 10.19615747  | 366.35092 | 506.8287108 | 17.56               |
| _140           | 0.282753               | 0.000022                | 0.001428            | 0.00003                 | 0.03256             | 0.00062                 | 1.467229    | 0.000035           | 0.282749223 | 141.5          | -1.131601747 | 0.777976201 | 1.878501767  | 715.21452 | 1045.174748 | 13.1                |
| _141           | 0.282192               | 0.000021                | 0.0004744           | 0.0000019               | 0.012108            | 0.000053                | 1.46721     | 0.000024           | 0.282182762 | 1033           | -20.96999487 | 0.742613646 | 1.845398696  | 1473.7386 | 1745.514757 | 17.65               |



|                           | 176Hf/177Hf<br>fstnorm | 176Hf/177Hfc<br>orr 2SE | 176Lu/177Hfc<br>orr | 176Lu/177Hfcor<br>r 2SE | 176Yb/177Hfc<br>orr | 176Yb/177Hfcor<br>r 2SE | 178Hf/177Hf<br>178Hf/177Hf | 178Hf/177Hf<br>2SE | 176Hf/177Hf | t (age,<br>Ma) | εHf(0)       | ±2 sigma    | εHf(t)       | TDM       | TDM C*      | TotalHfBe<br>am (V) |
|---------------------------|------------------------|-------------------------|---------------------|-------------------------|---------------------|-------------------------|----------------------------|--------------------|-------------|----------------|--------------|-------------|--------------|-----------|-------------|---------------------|
| Sierra de los Cuarzos Fm. |                        |                         |                     |                         |                     |                         |                            |                    |             |                |              |             |              |           |             |                     |
| P83a                      | 0.282771               | 0.000021                | 0.001378            | 0.00009                 | 0.0347              | 0.0026                  | 1.467204                   | 0.000027           | 0.282766697 | 167            | -0.495075764 | 0.742613646 | 3.064292141  | 688.55216 | 989.84442   | 16.74               |
| _1                        | 0.282796               | 0.000028                | 0.001285            | 0.000033                | 0.03314             | 0.00095                 | 1.467166                   | 0.000039           | 0.282791939 | 169            | 0.3889881    | 0.990151529 | 4.001795523  | 651.20737 | 931.8296583 | 14.64               |
| _2                        | 0.282823               | 0.000028                | 0.000931            | 0.000035                | 0.024               | 0.0012                  | 1.467228                   | 0.000032           | 0.282820128 | 165            | 1.343777074  | 0.990151529 | 4.909898233  | 606.94382 | 870.9130891 | 19                  |
| _4                        | 0.282737               | 0.000031                | 0.00175             | 0.000015                | 0.04658             | 0.00064                 | 1.467175                   | 0.000036           | 0.282731538 | 166.9          | -1.69740262  | 1.096239192 | 1.818313765  | 744.52139 | 1068.852111 | 14.7                |
| _5                        | 0.282857               | 0.000024                | 0.001445            | 0.00002                 | 0.03892             | 0.00082                 | 1.46719                    | 0.000031           | 0.282852704 | 159            | 2.546103931  | 0.84870131  | 5.928678047  | 566.59916 | 801.2994815 | 17.02               |
| _6                        | 0.282763               | 0.000022                | 0.00121             | 0.000027                | 0.02844             | 0.00058                 | 1.467217                   | 0.000037           | 0.282759199 | 168            | -0.777976201 | 0.777976201 | 2.821311303  | 696.83561 | 1006.059219 | 14.52               |
| _7                        | 0.28281                | 0.000022                | 0.001432            | 0.000017                | 0.03786             | 0.0004                  | 1.467198                   | 0.000029           | 0.282805421 | 171            | 0.884063865  | 0.777976201 | 4.523270378  | 633.73925 | 900.2291854 | 17.91               |
| _8                        | 0.282723               | 0.000022                | 0.001245            | 0.000013                | 0.03221             | 0.0004                  | 1.467234                   | 0.000026           | 0.282718109 | 210            | -2.192478385 | 0.777976201 | 2.303292418  | 754.37468 | 1071.806166 | 17.01               |
| _9                        | 0.282745               | 0.000028                | 0.002339            | 0.000052                | 0.0673              | 0.0013                  | 1.467185                   | 0.000029           | 0.282738572 | 147            | -1.414502184 | 0.990151529 | 1.62414342   | 744.87938 | 1065.612009 | 14.01               |
| _10                       | 0.282835               | 0.000023                | 0.001499            | 0.00002                 | 0.03832             | 0.00073                 | 1.467194                   | 0.000029           | 0.282830094 | 175            | 1.76812773   | 0.813338756 | 5.485221347  | 599.01115 | 842.1327058 | 16.41               |
| _11                       | 0.282732               | 0.000023                | 0.0009295           | 0.0000042               | 0.02427             | 0.00024                 | 1.467221                   | 0.000027           | 0.282729306 | 155            | -1.874215393 | 0.813338756 | 1.474435103  | 735.37898 | 1081.359093 | 16.91               |
| _12                       | 0.282707               | 0.000028                | 0.001414            | 0.000026                | 0.03926             | 0.00068                 | 1.467201                   | 0.000036           | 0.282700332 | 252            | -2.758279258 | 0.990151529 | 2.61075146   | 780.63764 | 1085.18663  | 15.24               |
| _13                       | 0.282601               | 0.000022                | 0.000743            | 0.00001                 | 0.02023             | 0.00015                 | 1.467202                   | 0.000024           | 0.282598722 | 164            | -6.506710045 | 0.777976201 | -2.944709723 | 915.2481  | 1367.851029 | 18.11               |
| _14                       | 0.282743               | 0.000038                | 0.001473            | 0.000042                | 0.0379              | 0.0015                  | 1.467208                   | 0.000034           | 0.282738538 | 162            | -1.485227293 | 1.343777074 | 1.956836734  | 730.39055 | 1056.233629 | 14.36               |
| _16                       | 0.282139               | 0.000023                | 0.000606            | 0.000023                | 0.0174              | 0.00059                 | 1.46721                    | 0.000033           | 0.282131704 | 641            | -22.84421027 | 0.813338756 | -8.809856043 | 1551.8167 | 2104.487742 | 16.17               |
| _17                       | 0.282832               | 0.000029                | 0.001783            | 0.000073                | 0.0513              | 0.002                   | 1.467193                   | 0.000031           | 0.282826866 | 154            | 1.662040066  | 1.025514083 | 4.903324985  | 607.9699  | 862.695053  | 13.93               |
| _18                       | 0.28276                | 0.000026                | 0.001466            | 0.000017                | 0.03795             | 0.00066                 | 1.467236                   | 0.000027           | 0.282753279 | 245            | -0.884063865 | 0.919426419 | 4.327990754  | 705.9279  | 970.7181787 | 15.82               |
| _19                       | 0.282715               | 0.000027                | 0.001848            | 0.000024                | 0.05007             | 0.00073                 | 1.467164                   | 0.00003            | 0.282709333 | 164            | -2.475378821 | 0.954788974 | 0.968219009  | 778.286   | 1120.478516 | 16.52               |
| _20                       | 0.28282                | 0.000023                | 0.001267            | 0.000013                | 0.03331             | 0.00057                 | 1.467212                   | 0.000026           | 0.282816067 | 166            | 1.237689411  | 0.813338756 | 4.78853068   | 616.68244 | 879.4239769 | 18.75               |
| _21                       | 0.282777               | 0.000024                | 0.001145            | 0.000013                | 0.02963             | 0.00031                 | 1.467206                   | 0.000036           | 0.28277336  | 170            | -0.282900437 | 0.84870131  | 3.366816818  | 675.75578 | 972.9752139 | 16.32               |
| _22                       | 0.282605               | 0.00002                 | 0.000801            | 0.0000065               | 0.02222             | 0.00021                 | 1.467249                   | 0.000027           | 0.282602529 | 165            | -6.365259826 | 0.707251092 | -2.787777026 | 911.04611 | 1358.728777 | 15.82               |
| _23                       | 0.282744               | 0.000024                | 0.00153             | 0.000086                | 0.04                | 0.002                   | 1.467212                   | 0.000028           | 0.282739022 | 174            | -1.449864738 | 0.84870131  | 2.241132591  | 730.079   | 1047.582069 | 17.09               |
| _24                       | 0.282753               | 0.000019                | 0.000965            | 0.000014                | 0.02364             | 0.00034                 | 1.467197                   | 0.000027           | 0.282743477 | 526            | -1.131601747 | 0.671888537 | 10.26959606  | 706.42675 | 814.353367  | 17.79               |
| _25                       | 0.282826               | 0.000024                | 0.001444            | 0.00005                 | 0.0384              | 0.0016                  | 1.467228                   | 0.000032           | 0.282821356 | 172            | 1.449864738  | 0.84870131  | 5.109246409  | 611.02229 | 863.7185259 | 16.81               |
| _26                       | 0.28232                | 0.000023                | 0.0006515           | 0.0000097               | 0.01759             | 0.00026                 | 1.467202                   | 0.000036           | 0.282317966 | 167            | -16.44358788 | 0.813338756 | -12.80988355 | 1303.5967 | 1988.795205 | 15.83               |
| _28                       | 0.282749               | 0.000027                | 0.001182            | 0.000041                | 0.0284              | 0.0012                  | 1.46722                    | 0.000028           | 0.282745309 | 167            | -1.273051965 | 0.954788974 | 2.307679215  | 716.19877 | 1037.882769 | 16.5                |
| _29                       | 0.282772               | 0.00002                 | 0.000881            | 0.000015                | 0.02313             | 0.00048                 | 1.467181                   | 0.00003            | 0.282769216 | 169            | -0.45971321  | 0.707251092 | 3.197940667  | 678.07916 | 982.9210869 | 17.17               |
| _30                       | 0.282744               | 0.000024                | 0.0015733           | 0.0000088               | 0.04064             | 0.00023                 | 1.4672                     | 0.000029           | 0.282739234 | 162            | -1.449864738 | 0.84870131  | 1.98146428   | 730.93158 | 1054.67119  | 15.73               |
| _31                       | 0.282723               | 0.00002                 | 0.001197            | 0.000023                | 0.03335             | 0.00046                 | 1.467196                   | 0.000024           | 0.282719419 | 160            | -2.192478385 | 0.707251092 | 1.235970137  | 753.40818 | 1100.384772 | 17.33               |
| _32                       | 0.282771               | 0.000022                | 0.001284            | 0.000022                | 0.03118             | 0.00063                 | 1.467228                   | 0.000025           | 0.282767231 | 157            | -0.495075764 | 0.777976201 | 2.860530559  | 686.81946 | 994.9562173 | 17.35               |
| _33                       | 0.282731               | 0.000024                | 0.00128             | 0.000028                | 0.0309              | 0.00062                 | 1.467229                   | 0.000027           | 0.282727171 | 160            | -1.909577948 | 0.84870131  | 1.510187232  | 743.69786 | 1082.999377 | 16.59               |
| P83a_1                    | 0.282748               | 0.000021                | 0.001028            | 0.000025                | 0.02663             | 0.00052                 | 1.46721                    | 0.000028           | 0.282744617 | 176            | -1.30841452  | 0.742613646 | 2.48360023   | 714.6813  | 1033.760381 | 17.46               |
| SQB-168                   |                        |                         |                     |                         |                     |                         |                            |                    |             |                |              |             |              |           |             |                     |
| Sierra de los Cuarzos Fm. |                        |                         |                     |                         |                     |                         |                            |                    |             |                |              |             |              |           |             |                     |
| SQB-168                   | 0.282705               | 0.000031                | 0.001373            | 0.000042                | 0.03857             | 0.00098                 | 1.46719                    | 0.000032           | 0.282701586 | 133            | -2.829004367 | 1.096239192 | 0.004337489  | 782.63074 | 1157.344726 | 12.2                |
| _34                       | 0.28205                | 0.000066                | 0.001684            | 0.00005                 | 0.0438              | 0.0016                  | 1.4672                     | 0.000069           | 0.28200075  | 1544           | -25.99147762 | 2.333928603 | 7.040922223  | 1722.5795 | 1823.936735 | 8.94                |
| _35                       | 0.282011               | 0.000024                | 0.001456            | 0.000033                | 0.03935             | 0.00087                 | 1.467159                   | 0.00003            | 0.28197534  | 1296           | -27.37061725 | 0.84870131  | 0.470006704  | 1766.8526 | 2037.504324 | 15.45               |
| _36                       | 0.281957               | 0.000031                | 0.001055            | 0.000018                | 0.02722             | 0.00056                 | 1.467242                   | 0.000042           | 0.281928778 | 1414           | -29.2801952  | 1.096239192 | 1.511568644  | 1823.0966 | 2065.416127 | 9.21                |
| _37                       | 0.282118               | 0.000044                | 0.0004221           | 0.0000094               | 0.01138             | 0.00026                 | 1.467186                   | 0.000065           | 0.282110647 | 925            | -23.58682391 | 1.555952402 | -3.155559656 | 1573.1773 | 1973.05356  | 8.37                |
| _38                       | 0.282038               | 0.000039                | 0.000908            | 0.000012                | 0.02357             | 0.00046                 | 1.467191                   | 0.000045           | 0.282013345 | 1435           | -26.41582828 | 1.379139629 | 4.991773243  | 1704.0909 | 1865.493591 | 9.56                |
| _39                       | 0.281975               | 0.000042                | 0.001088            | 0.000046                | 0.0296              | 0.0012                  | 1.467143                   | 0.000029           | 0.281945478 | 1434           | -28.64366922 | 1.485227293 | 2.561197414  | 1799.7023 | 2015.94556  | 10.51               |
| _40                       | 0.281899               | 0.000043                | 0.001437            | 0.000025                | 0.03736             | 0.00049                 | 1.46715                    | 0.00004            | 0.281856559 | 1559           | -31.33122337 | 1.520589847 | 2.26799964   | 1922.7612 | 2132.477412 | 11.18               |
| _41                       | 0.281977               | 0.00005                 | 0.001044            | 0.000054                | 0.0267              | 0.0015                  | 1.467156                   | 0.000058           | 0.281949912 | 1372           | -28.75294411 | 1.76812773  | 1.301896838  | 1794.8446 | 2045.453402 | 8.84                |
| _42                       | 0.281894               | 0.000035                | 0.00118             | 0.000023                | 0.0308              | 0.00057                 | 1.467166                   | 0.000041           | 0.281862615 | 1406           | -31.50803614 | 1.237689411 | -1.018344639 | 1916.6615 | 2215.986222 | 9.86                |
| _43                       | 0.282075               | 0.000031                | 0.000535            | 0.000012                | 0.01449             | 0.00038                 | 1.46718                    | 0.000051           | 0.282061191 | 1365           | -25.10741376 | 1.096239192 | 5.089274947  | 1636.8269 | 1804.172772 | 15.07               |
| _44                       | 0.281995               | 0.000032                | 0.001211            | 0.000024                | 0.03482             | 0.00084                 | 1.467203                   | 0.000032           | 0.28196221  | 1431           | -27.93641813 | 1.131601747 | 3.086206125  | 1777.6978 | 1980.951748 | 13.82               |
| _45                       | 0.282359               | 0.00004                 | 0.002494            | 0.000078                | 0.0507              | 0.0014                  | 1.467199                   | 0.000034           | 0.2823474   |                |              |             |              |           |             |                     |

|                                   | 176Hf/177Hf<br>fstnorm | 176Hf/177Hf<br>orr 2SE | 176Lu/177Hf<br>orr | 176Lu/177Hf<br>r 2SE | 176Yb/177Hf<br>orr | 176Yb/177Hf<br>r 2SE | 178Hf/177Hf | 178Hf/177Hf<br>2SE | 176Hf/177Hf | t (age,<br>Ma) | εHf(0)       | ±2 sigma    | εHf(t)       | TDM       | TDM C*      | TotalHfBe<br>am (V) |
|-----------------------------------|------------------------|------------------------|--------------------|----------------------|--------------------|----------------------|-------------|--------------------|-------------|----------------|--------------|-------------|--------------|-----------|-------------|---------------------|
| _60                               | 0.281423               | 0.000031               | 0.000218           | 0.000012             | 0.00651            | 0.00031              | 1.467218    | 0.000039           | 0.28141438  | 2077           | -48.16379935 | 1.096239192 | -1.495812867 | 2503.4938 | 2771.174072 | 16.7                |
| _61                               | 0.282098               | 0.000029               | 0.001396           | 0.000049             | 0.0353             | 0.0011               | 1.467217    | 0.000034           | 0.282055911 | 1591           | -24.294075   | 1.025514083 | 10.0767857   | 1642.0463 | 1671.700609 | 14.1                |
| _62                               | 0.282013               | 0.000027               | 0.000321           | 0.000028             | 0.00915            | 0.00078              | 1.467191    | 0.000041           | 0.282007622 | 890            | -27.29989214 | 0.954788974 | -7.597082763 | 1712.2984 | 2221.762484 | 12.5                |
| _63                               | 0.282215               | 0.000036               | 0.00141            | 0.000023             | 0.03466            | 0.00074              | 1.467146    | 0.000048           | 0.282189983 | 942            | -20.15665612 | 1.273051965 | 0.040315349  | 1478.1056 | 1787.013802 | 16.9                |
| _64                               | 0.282104               | 0.000028               | 0.001              | 0.000035             | 0.02692            | 0.00094              | 1.467216    | 0.000034           | 0.282083174 | 1104           | -24.08189968 | 0.990151529 | -0.073966776 | 1616.5843 | 1920.929602 | 13.06               |
| _65                               | 0.281939               | 0.00005                | 0.0013357          | 0.000052             | 0.03296            | 0.00012              | 1.467157    | 0.000079           | 0.281898215 | 1611           | -29.91672118 | 1.76812773  | 4.939207176  | 1861.7987 | 2007.709905 | 10.15               |
| _66                               | 0.282632               | 0.000039               | 0.001075           | 0.00001              | 0.02493            | 0.00027              | 1.467179    | 0.000038           | 0.282617757 | 705            | -5.410470852 | 1.379139629 | 9.843998308  | 879.57634 | 983.1947638 | 10.31               |
| _67                               | 0.282078               | 0.000048               | 0.001477           | 0.000069             | 0.0422             | 0.0019               | 1.467112    | 0.000067           | 0.282063201 | 534            | -25.0013261  | 1.69740262  | -13.63573181 | 1673.7213 | 2321.48217  | 7.8                 |
| _68                               | 0.282051               | 0.000051               | 0.002844           | 0.000083             | 0.0818             | 0.0026               | 1.467208    | 0.000045           | 0.281972357 | 1461           | -25.95611507 | 1.803490284 | 4.132388993  | 1776.3981 | 1939.513284 | 9.19                |
| _69                               | 0.282163               | 0.000054               | 0.001232           | 0.000042             | 0.0336             | 0.0012               | 1.46716     | 0.000057           | 0.282131884 | 1336           | -21.99550896 | 1.909577948 | 6.93462055   | 1543.9794 | 1665.973132 | 8.5                 |
| _70                               | 0.281947               | 0.000032               | 0.001181           | 0.000032             | 0.02942            | 0.00082              | 1.467196    | 0.000048           | 0.281910439 | 1633           | -29.63382075 | 1.131601747 | 5.878208023  | 1843.0703 | 1966.742684 | 11.62               |
| _71                               | 0.282098               | 0.000036               | 0.001001           | 0.000039             | 0.02711            | 0.00099              | 1.467201    | 0.000036           | 0.282073427 | 1299           | -24.294075   | 1.273051965 | 4.017115279  | 1624.9638 | 1819.026762 | 13.4                |
| SQB-168_1                         | 0.282442               | 0.000049               | 0.00195            | 0.000069             | 0.0581             | 0.0025               | 1.467141    | 0.000057           | 0.282415869 | 713            | -12.12935622 | 1.732765175 | 2.873621671  | 1174.3561 | 1429.935179 | 10.51               |
| SQT-8                             |                        |                        |                    |                      |                    |                      |             |                    |             |                |              |             |              |           |             |                     |
| Pelones Fm.                       |                        |                        |                    |                      |                    |                      |             |                    |             |                |              |             |              |           |             |                     |
| SQT-8                             | 0.282166               | 0.00002                | 0.000379           | 0.000045             | 0.0109             | 0.0013               | 1.467201    | 0.000027           | 0.282158656 | 1028           | -21.88942129 | 0.707251092 | 0.877621985  | 1505.7149 | 1802.056612 | 19.52               |
| _72                               | 0.282893               | 0.000036               | 0.001554           | 0.000018             | 0.03803            | 0.00037              | 1.467226    | 0.00003            | 0.282888933 | 140            | 3.819155896  | 1.273051965 | 6.787173436  | 516.46163 | 731.5912319 | 11.01               |
| _73                               | 0.282724               | 0.00003                | 0.002173           | 0.000072             | 0.0609             | 0.002                | 1.467231    | 0.00003            | 0.282718557 | 134            | -2.15711583  | 1.060876638 | 0.626877222  | 772.10272 | 1118.687579 | 13.79               |
| _74                               | 0.282716               | 0.000038               | 0.001336           | 0.000017             | 0.03653            | 0.00033              | 1.467205    | 0.000037           | 0.282712603 | 136            | -2.440016267 | 1.343777074 | 0.460781052  | 766.1869  | 1130.772978 | 12.6                |
| _75                               | 0.282637               | 0.00003                | 0.001428           | 0.000049             | 0.0361             | 0.0012               | 1.467155    | 0.000033           | 0.282632728 | 160            | -5.233658079 | 1.060876638 | -1.830737836 | 880.78014 | 1294.430935 | 12.16               |
| _76                               | 0.28201                | 0.000021               | 0.000363           | 0.0000012            | 0.009454           | 0.000054             | 1.467194    | 0.000028           | 0.281999927 | 1466           | -27.40597981 | 0.742613646 | 5.224991102  | 1718.2504 | 1875.434486 | 18.13               |
| _77                               | 0.282783               | 0.000028               | 0.001811           | 0.00003              | 0.0486             | 0.0011               | 1.467186    | 0.000026           | 0.282777819 | 153            | -0.070725109 | 0.990151529 | 3.146052729  | 679.30547 | 973.6852173 | 13.33               |
| _78                               | 0.282673               | 0.000027               | 0.000929           | 0.000013             | 0.02419            | 0.00028              | 1.46723     | 0.000038           | 0.282670656 | 135            | -3.960606114 | 0.954788974 | -1.045295198 | 818.49063 | 1225.330232 | 11.18               |
| _79                               | 0.282732               | 0.000028               | 0.001377           | 0.000018             | 0.03866            | 0.00048              | 1.467194    | 0.000031           | 0.282728551 | 134            | -1.874215393 | 0.990151529 | 0.980392626  | 744.2061  | 1096.279972 | 11.53               |
| _80                               | 0.282712               | 0.000038               | 0.002053           | 0.000044             | 0.05228            | 0.00086              | 1.467196    | 0.000044           | 0.282706435 | 145            | -2.581466485 | 1.343777074 | 0.442816889  | 787.00025 | 1138.933877 | 10.01               |
| _81                               | 0.282737               | 0.000024               | 0.0008467          | 0.0000039            | 0.021361           | 0.000083             | 1.467202    | 0.000028           | 0.282734372 | 166            | -1.69740262  | 0.84870131  | 1.898507559  | 726.73375 | 1063.061737 | 15.74               |
| _82                               | 0.282749               | 0.000036               | 0.00164            | 0.000022             | 0.04545            | 0.00051              | 1.467216    | 0.000032           | 0.282744738 | 139            | -1.273051965 | 1.273051965 | 1.664253726  | 725.0619  | 1056.81472  | 11.86               |
| _83                               | 0.28269                | 0.00011                | 0.002082           | 0.00005              | 0.0533             | 0.0014               | 1.467258    | 0.000083           | 0.282684863 | 132            | -3.359442686 | 3.889881005 | -0.609475137 | 819.58656 | 1195.421921 | 2.94                |
| _84                               | 0.281996               | 0.000046               | 0.001308           | 0.000051             | 0.0326             | 0.0011               | 1.46723     | 0.000034           | 0.2819859   | 412            | -27.90105557 | 1.626677511 | -19.10095814 | 1780.8734 | 2565.910217 | 14.3                |
| _85                               | 0.282738               | 0.000025               | 0.0014124          | 0.0000057            | 0.0394             | 0.00014              | 1.467209    | 0.000031           | 0.282734409 | 136            | -1.662040066 | 0.884063865 | 1.232121603  | 736.34413 | 1081.880649 | 13.86               |
| _86                               | 0.282725               | 0.000023               | 0.001605           | 0.00005              | 0.0448             | 0.0014               | 1.467225    | 0.00003            | 0.282720559 | 148            | -2.121753275 | 0.813338756 | 1.009209867  | 758.83287 | 1105.385718 | 15.37               |
| _87                               | 0.282727               | 0.000031               | 0.001964           | 0.000027             | 0.05457            | 0.00097              | 1.467204    | 0.000033           | 0.282721823 | 141            | -2.051028166 | 1.096239192 | 0.898155455  | 763.35797 | 1106.958885 | 13.82               |
| _88                               | 0.282781               | 0.000022               | 0.001001           | 0.000018             | 0.02664            | 0.00032              | 1.467191    | 0.000029           | 0.28277838  | 140            | -0.141450218 | 0.777976201 | 2.876532223  | 667.5127  | 980.630905  | 17.04               |
| _89                               | 0.282727               | 0.000035               | 0.001423           | 0.000024             | 0.03775            | 0.0005               | 1.467156    | 0.000036           | 0.282723222 | 142            | -2.051028166 | 1.237689411 | 0.969908649  | 752.26755 | 1103.191505 | 10.08               |
| _90                               | 0.282778               | 0.000056               | 0.002739           | 0.000085             | 0.073              | 0.0022               | 1.467122    | 0.000049           | 0.282770678 | 143            | -0.247537882 | 1.980303057 | 2.670830562  | 704.28069 | 996.0457129 | 6.66                |
| _91                               | 0.282778               | 0.000036               | 0.00229            | 0.000018             | 0.0628             | 0.00083              | 1.46722     | 0.000036           | 0.282754148 | 555            | -0.247537882 | 1.273051965 | 11.29874673  | 695.58012 | 771.7836046 | 10.11               |
| _92                               | 0.282735               | 0.00007                | 0.002473           | 0.000051             | 0.0656             | 0.0015               | 1.467231    | 0.000049           | 0.28272825  | 146            | -1.76812773  | 2.475378821 | 1.236758852  | 762.33817 | 1089.398103 | 5.34                |
| _93                               | 0.282776               | 0.000037               | 0.001398           | 0.000018             | 0.03991            | 0.00058              | 1.467174    | 0.000038           | 0.282772289 | 142            | -0.318262991 | 1.30841452  | 2.705568175  | 681.77626 | 993.0565534 | 8.91                |
| _94                               | 0.282716               | 0.00003                | 0.0014847          | 0.0000062            | 0.04033            | 0.00042              | 1.467239    | 0.000034           | 0.282712142 | 139            | -2.440016267 | 1.060876638 | 0.511203878  | 769.25115 | 1129.919337 | 11.27               |
| _95                               | 0.282763               | 0.000024               | 0.002713           | 0.00005              | 0.0809             | 0.0013               | 1.467177    | 0.000027           | 0.282756153 | 135            | -0.777976201 | 0.84870131  | 1.979033897  | 725.98564 | 1033.712237 | 15.95               |
| _96                               | 0.282749               | 0.00002                | 0.0008688          | 0.0000026            | 0.02405            | 0.00018              | 1.467246    | 0.000028           | 0.28274658  | 149            | -1.273051965 | 0.707251092 | 1.951930551  | 710.2615  | 1046.379383 | 16.3                |
| _97                               | 0.282784               | 0.000022               | 0.001349           | 0.000021             | 0.03304            | 0.00044              | 1.467199    | 0.000032           | 0.282779661 | 172            | -0.035362555 | 0.777976201 | 3.634260742  | 669.46019 | 957.5469172 | 15.96               |
| _98                               | 0.282803               | 0.00002                | 0.001061           | 0.000021             | 0.02756            | 0.00073              | 1.467195    | 0.000026           | 0.282799806 | 161            | 0.636525983  | 0.707251092 | 4.101937555  | 637.40262 | 919.1870714 | 16.53               |
| _99                               | 0.282733               | 0.000021               | 0.000973           | 0.000013             | 0.02356            | 0.00028              | 1.467204    | 0.000024           | 0.282730198 | 154            | -1.838852839 | 0.742613646 | 1.4837364    | 734.81626 | 1079.987807 | 16.68               |
| _100                              | 0.282818               | 0.000024               | 0.0012317          | 0.0000078            | 0.03175            | 0.00036              | 1.467198    | 0.000025           | 0.282814108 | 169            | 1.166964302  | 0.84870131  | 4.78602264   | 618.9492  | 881.9387213 | 18.57               |
| SQT-8_1                           | 0.282784               | 0.000029               | 0.001675           | 0.00004              | 0.047              | 0.0012               | 1.467229    | 0.000029           | 0.282779365 | 148            | -0.035362555 | 1.025514083 | 3.089435172  | 675.36553 | 973.3668204 | 13.12               |
| VB14-5-11(4)                      |                        |                        |                    |                      |                    |                      |             |                    |             |                |              |             |              |           |             |                     |
| Santo-Tomás Tejuapilco Assemblage |                        |                        |                    |                      |                    |                      |             |                    |             |                |              |             |              |           |             |                     |
| VB11-4                            | 0.28261                | 0.000026               | 0.001112           | 0.000031             | 0.03423            | 0.00073              | 1.467209    | 0.000037           | 0.282606859 | 151.1          | -6.188447053 | 0.919426419 | -2.94388663  | 911.51936 | 1357.778753 | 14.31               |
| _1</                              |                        |                        |                    |                      |                    |                      |             |                    |             |                |              |             |              |           |             |                     |

|          | 176Hf/177Hf<br>fstnorm | 176Hf/177Hf<br>corr 2SE | 176Lu/177Hf<br>corr | 176Lu/177Hf<br>corr 2SE | 176Yb/177Hf<br>corr | 176Yb/177Hf<br>corr 2SE | 178Hf/177Hf | 178Hf/177Hf<br>2SE | 176Hf/177Hf | t (age,<br>Ma) | εHf(0)       | ±2 sigma    | εHf(t)       | TDM       | TDM C*      | TotalHfBe<br>am (V) |
|----------|------------------------|-------------------------|---------------------|-------------------------|---------------------|-------------------------|-------------|--------------------|-------------|----------------|--------------|-------------|--------------|-----------|-------------|---------------------|
| _13      | 0.282586               | 0.000031                | 0.001392            | 0.000024                | 0.03982             | 0.00058                 | 1.467209    | 0.000033           | 0.2825825   | 134.5          | -7.037148364 | 1.096239192 | -4.17474916  | 952.49103 | 1422.502077 | 14.75               |
| _14      | 0.282475               | 0.000032                | 0.003238            | 0.00004                 | 0.0932              | 0.0012                  | 1.467216    | 0.00003            | 0.282465101 | 163.5          | -10.96239192 | 1.131601747 | -7.682725261 | 1167.7264 | 1665.477799 | 15.6                |
| _15      | 0.282733               | 0.000042                | 0.002005            | 0.000019                | 0.05988             | 0.00037                 | 1.467152    | 0.00004            | 0.282728079 | 131.3          | -1.838852839 | 1.485227293 | 0.903677995  | 755.5061  | 1099.037787 | 11.7                |
| _16      | 0.281532               | 0.000024                | 0.001212            | 0.000035                | 0.03198             | 0.00054                 | 1.467192    | 0.000038           | 0.28149039  | 1808           | -44.3092809  | 0.84870131  | -5.009034945 | 2418.9797 | 2775.751428 | 12.03               |
| _17      | 0.282745               | 0.000022                | 0.0008361           | 0.0000049               | 0.02475             | 0.0003                  | 1.467196    | 0.000028           | 0.282742921 | 133            | -1.414502184 | 0.777976201 | 1.466474889  | 715.27547 | 1064.672916 | 15.18               |
| _18      | 0.282754               | 0.000027                | 0.0009679           | 0.0000064               | 0.02749             | 0.00043                 | 1.467217    | 0.000032           | 0.282751688 | 127.8          | -1.096239192 | 0.954788974 | 1.660884894  | 705.06894 | 1048.274749 | 13.87               |
| _19      | 0.282969               | 0.000022                | 0.001011            | 0.000016                | 0.02648             | 0.00037                 | 1.467181    | 0.00003            | 0.282966608 | 126.6          | 6.506710045  | 0.777976201 | 9.236438361  | 401.04329 | 564.4420124 | 15.41               |
| _20      | 0.28226                | 0.000023                | 0.000732            | 0.000028                | 0.02288             | 0.00085                 | 1.467198    | 0.000029           | 0.282252721 | 530            | -18.56534116 | 0.813338756 | -7.01550069  | 1389.5454 | 1906.957517 | 15.28               |
| _21      | 0.281064               | 0.000025                | 0.000314            | 0.0000022               | 0.008786            | 0.000074                | 1.467177    | 0.00003            | 0.28104816  | 2636           | -60.85895645 | 0.884063865 | -1.48989538  | 2989.2704 | 3209.801092 | 13.95               |
| _22      | 0.282377               | 0.000026                | 0.001664            | 0.000026                | 0.04141             | 0.0003                  | 1.46722     | 0.00003            | 0.282358506 | 592            | -14.42792227 | 0.919426419 | -1.87899588  | 1257.9637 | 1633.834422 | 15.13               |
| _23      | 0.28269                | 0.000081                | 0.00276             | 0.000075                | 0.0644              | 0.0016                  | 1.467246    | 0.000077           | 0.282682466 | 146            | -3.359442686 | 2.864366922 | -0.382783584 | 835.05711 | 1191.986569 | 4.8                 |
| _24      | 0.282383               | 0.000019                | 0.000702            | 0.000013                | 0.02082             | 0.00042                 | 1.467215    | 0.000031           | 0.282374203 | 667            | -14.21574695 | 0.671888537 | 0.36253268   | 1217.8943 | 1551.737162 | 19.62               |
| _25      | 0.282728               | 0.000035                | 0.001117            | 0.000024                | 0.02706             | 0.00059                 | 1.467209    | 0.000043           | 0.282725413 | 123.9          | -2.015665612 | 1.237689411 | 0.644733256  | 744.71935 | 1109.673114 | 12.83               |
| _26      | 0.282481               | 0.000031                | 0.003296            | 0.000058                | 0.1033              | 0.0014                  | 1.467189    | 0.00003            | 0.282470806 | 165.4          | -10.7502166  | 1.096239192 | -7.438632425 | 1160.677  | 1651.632059 | 15.12               |
| _27      | 0.282974               | 0.00003                 | 0.0016189           | 0.0000053               | 0.04823             | 0.00038                 | 1.467241    | 0.00003            | 0.282970269 | 123.3          | 6.683522818  | 1.060876638 | 9.292487401  | 400.41993 | 558.2467101 | 13.63               |
| _28      | 0.282939               | 0.000041                | 0.00288             | 0.000023                | 0.07753             | 0.00044                 | 1.467172    | 0.000046           | 0.282932573 | 119.4          | 5.445833407  | 1.449864738 | 7.872283824  | 466.92675 | 646.0452562 | 10.4                |
| _29      | 0.28258                | 0.000047                | 0.002128            | 0.000057                | 0.0564              | 0.0016                  | 1.467225    | 0.000063           | 0.28257345  | 164.6          | -7.249323691 | 1.662040066 | -3.825335936 | 980.34394 | 1423.831955 | 8.93                |
| _30      | 0.282822               | 0.000028                | 0.001866            | 0.000082                | 0.0448              | 0.0018                  | 1.467163    | 0.000033           | 0.282817406 | 131.7          | 1.30841452   | 0.990151529 | 4.072298429  | 623.83632 | 898.0951012 | 11.63               |
| VB11-4_1 | 0.282882               | 0.000026                | 0.001019            | 0.000012                | 0.03052             | 0.00066                 | 1.467198    | 0.000031           | 0.282879407 | 136.1          | 3.430167795  | 0.919426419 | 6.36340563   | 524.71512 | 755.5658727 | 15.79               |

**VB11-5**  
**Ensamble Ojo de Agua**

|        |          |          |           |           |         |         |          |          |             |       |              |             |              |           |             |       |
|--------|----------|----------|-----------|-----------|---------|---------|----------|----------|-------------|-------|--------------|-------------|--------------|-----------|-------------|-------|
| VB-5   | 0.282778 | 0.000033 | 0.00152   | 0.00011   | 0.0412  | 0.0035  | 1.467177 | 0.000044 | 0.282774392 | 127   | -0.247537882 | 1.166964302 | 2.44618095   | 681.14938 | 997.7938284 | 10.64 |
| _31    | 0.282937 | 0.000024 | 0.000957  | 0.000026  | 0.02275 | 0.00032 | 1.467182 | 0.000035 | 0.28293449  | 140.3 | 5.375108298  | 0.84870131  | 8.405370334  | 445.88253 | 628.4376284 | 13.66 |
| _32    | 0.282341 | 0.000025 | 0.001603  | 0.000047  | 0.04822 | 0.0007  | 1.467188 | 0.000037 | 0.282337159 | 128.2 | -15.70097424 | 0.884063865 | -12.99320209 | 1307.0655 | 1970.49234  | 14.1  |
| _33    | 0.282748 | 0.00004  | 0.003179  | 0.000062  | 0.0913  | 0.0026  | 1.46719  | 0.00003  | 0.282739436 | 144.1 | -1.30841452  | 1.414502184 | 1.590170334  | 758.02054 | 1065.500497 | 13.82 |
| _34    | 0.282806 | 0.000033 | 0.0009611 | 0.0000092 | 0.02992 | 0.00043 | 1.467243 | 0.000029 | 0.28280317  | 157.5 | 0.742613646  | 1.166964302 | 4.142997074  | 631.47039 | 913.8303227 | 12.96 |
| _35    | 0.282876 | 0.000026 | 0.000976  | 0.00001   | 0.02373 | 0.00027 | 1.467211 | 0.000032 | 0.282873608 | 131.1 | 3.217992468  | 0.919426419 | 6.046972253  | 532.61818 | 771.8199199 | 14.61 |
| _36    | 0.282378 | 0.000027 | 0.002114  | 0.000025  | 0.0609  | 0.00092 | 1.467218 | 0.000032 | 0.28237308  | 124.5 | -14.39255972 | 0.954788974 | -11.80475089 | 1271.9389 | 1893.474539 | 15.68 |
| _37    | 0.282846 | 0.000025 | 0.000741  | 0.000016  | 0.01994 | 0.00036 | 1.46724  | 0.000035 | 0.282844395 | 115.9 | 2.15711583   | 0.884063865 | 4.675391477  | 571.54323 | 847.3048078 | 13.06 |
| _38    | 0.282867 | 0.000026 | 0.001084  | 0.000024  | 0.02822 | 0.00048 | 1.467233 | 0.000029 | 0.282864057 | 145.2 | 2.899729476  | 0.919426419 | 6.023007793  | 546.94054 | 784.4349132 | 14.11 |
| _39    | 0.282658 | 0.000032 | 0.0014956 | 0.0000092 | 0.04444 | 0.00049 | 1.467228 | 0.000033 | 0.282634927 | 820   | -4.491044433 | 1.131601747 | 13.04726071  | 852.39118 | 871.0755716 | 10.88 |
| _40    | 0.282849 | 0.000026 | 0.000846  | 0.000011  | 0.0207  | 0.00034 | 1.467198 | 0.000027 | 0.282839438 | 602   | 2.263203494  | 0.919426419 | 15.37542013  | 568.89932 | 548.8677185 | 13.39 |
| _41    | 0.282848 | 0.000028 | 0.001226  | 0.000027  | 0.03255 | 0.0009  | 1.467214 | 0.00003  | 0.282845021 | 130   | 2.227840939  | 0.990151529 | 5.011273018  | 576.10908 | 836.9765529 | 13.52 |
| _43    | 0.282831 | 0.000034 | 0.002835  | 0.00007   | 0.0906  | 0.0036  | 1.467174 | 0.000038 | 0.282823761 | 136.6 | 1.626677511  | 1.202326856 | 4.406124654  | 627.33728 | 880.6924489 | 10.93 |
| _44    | 0.282862 | 0.000024 | 0.001405  | 0.000021  | 0.03766 | 0.00052 | 1.4672   | 0.000036 | 0.282858512 | 132.8 | 2.722916704  | 0.84870131  | 5.550819457  | 558.82631 | 804.7929406 | 12.72 |
| _45    | 0.282756 | 0.000035 | 0.002162  | 0.000032  | 0.0664  | 0.0018  | 1.467191 | 0.000031 | 0.282750342 | 140   | -1.025514083 | 1.237689411 | 1.88470758   | 725.22859 | 1043.608175 | 12.64 |
| _46    | 0.28283  | 0.000031 | 0.002105  | 0.00002   | 0.06444 | 0.00099 | 1.467166 | 0.000033 | 0.282825168 | 122.8 | 1.591314957  | 1.096239192 | 4.148829153  | 616.25068 | 886.2453554 | 11.84 |
| _47    | 0.28264  | 0.000027 | 0.0016575 | 0.0000046 | 0.04894 | 0.00078 | 1.467206 | 0.000031 | 0.282635218 | 154.3 | -5.127570416 | 0.954788974 | -1.869480465 | 881.93468 | 1292.443822 | 13.44 |
| _48    | 0.282547 | 0.000032 | 0.001971  | 0.000043  | 0.0577  | 0.0024  | 1.467205 | 0.000033 | 0.282541229 | 156.6 | -8.416287993 | 1.131601747 | -5.143161028 | 1023.7799 | 1500.604838 | 11.25 |
| _49    | 0.282615 | 0.000024 | 0.001315  | 0.000012  | 0.03965 | 0.00046 | 1.467191 | 0.000032 | 0.282611726 | 133.2 | -6.01163428  | 0.84870131  | -3.169858611 | 909.36704 | 1358.13373  | 13.78 |
| _50    | 0.282909 | 0.000033 | 0.001451  | 0.000033  | 0.0455  | 0.0015  | 1.467221 | 0.000037 | 0.282905846 | 116.3 | 4.384956769  | 1.166964302 | 6.857921261  | 492.052   | 708.4198513 | 9.64  |
| _51    | 0.282933 | 0.000047 | 0.003981  | 0.000021  | 0.1402  | 0.0018  | 1.467152 | 0.000044 | 0.282924213 | 118.1 | 5.233658079  | 1.662040066 | 7.547633853  | 491.04851 | 665.7737057 | 8.38  |
| _52    | 0.282807 | 0.00003  | 0.001824  | 0.000031  | 0.0537  | 0.0011  | 1.467194 | 0.00003  | 0.282802325 | 137.1 | 0.777976201  | 1.060876638 | 3.659011434  | 644.83164 | 928.6197181 | 13.58 |
| _53    | 0.282919 | 0.000022 | 0.0006062 | 0.0000066 | 0.01858 | 0.0004  | 1.4672   | 0.000026 | 0.282917679 | 116.6 | 4.738582315  | 0.777976201 | 7.28314779   | 467.05522 | 681.4935791 | 14.91 |
| _54    | 0.283006 | 0.000028 | 0.000665  | 0.000014  | 0.01752 | 0.00056 | 1.467185 | 0.000033 | 0.283004537 | 117.7 | 7.815124565  | 0.990151529 | 10.37995698  | 345.22387 | 484.130652  | 11.83 |
| _55    | 0.282109 | 0.000027 | 0.001183  | 0.000043  | 0.0391  | 0.0019  | 1.467218 | 0.000038 | 0.282082807 | 1173  | -23.9050869  | 0.954788974 | 1.480640409  | 1617.4325 | 1878.135377 | 11.63 |
| _56    | 0.283088 | 0.00003  | 0.002904  | 0.000039  | 0.089   | 0.00072 | 1.467211 | 0.000035 | 0.283081117 | 126.8 | 10.71485404  | 1.060876638 | 13.29138012  | 243.89457 | 304.3232331 | 12.75 |
| _57    | 0.282872 | 0.000026 | 0.001207  | 0.000017  | 0.03666 | 0.00082 | 1.467206 | 0.000026 | 0.282869019 | 132.1 | 3.076542249  | 0.919426419 | 5.906914845  | 541.61246 | 781.5387218 | 13.66 |
| _58    | 0.282352 | 0.000025 | 0.0006177 | 0.0000058 | 0.02064 | 0.00016 | 1.467207 | 0.000035 | 0.282339583 | 1066  | -15.31198614 | 0.884063865 | 8.152741706  | 1258.1514 | 1375.912007 | 13.81 |
| _59    | 0.282534 | 0.000041 | 0.001157  | 0.000044  | 0.03077 | 0.00091 | 1.467201 | 0.000052 | 0.282524282 | 448   | -8.876001202 | 1.449864738 | 0.760929     | 1019.9583 | 1355.464979 | 12.58 |
| _60    | 0.282723 | 0.000039 | 0.002896  | 0.000097  | 0.0946  | 0.0041  | 1.467185 | 0.000034 | 0.2827149   | 149.6 | -2.192478385 | 1.379139629 | 0.84463692   | 789.19726 | 1117.065473 | 11.74 |
| _61    | 0.282933 | 0.000039 | 0.001664  | 0.000022  | 0.04873 | 0.0007  | 1.467143 | 0.000033 | 0.282928832 | 134   | 5.233658079  | 1.379139629 | 8.064952184  | 460.20993 | 645.236775  | 11.85 |
| _62    | 0.282401 | 0.000027 | 0.00095   | 0.000051  | 0.0265  | 0.0011  | 1.467172 | 0.000045 | 0.282391517 | 532   | -13.57922096 | 0.954788974 | -2.056649079 | 1200.7004 | 1598.231582 | 12.5  |
| _63    | 0.282406 | 0.000021 | 0.0008026 | 0.0000071 | 0.02618 | 0.00018 | 1.467183 | 0.000027 | 0.282391287 | 973   | -13.40240819 | 0.742613646 | 7.876098113  | 1189.079  | 1319.756213 | 15.2  |
| _64    | 0.282128 | 0.000027 | 0.0009128 | 0.0000078 | 0.02748 | 0.00029 | 1.467207 | 0.000027 | 0.282105365 | 1312  | -23.23319837 | 0.954788974 | 5.446360147  | 1579.5955 | 1740.050295 | 12.31 |
| VB-5_1 | 0.28238  | 0.00003  | 0.001479  | 0.000034  | 0.04549 | 0.00054 | 1.467193 | 0.000034 | 0.282365906 | 508   | -14.32183461 | 1.060876638 | -3.501448656 | 1247.4817 | 1670.161232 | 13.15 |

|                                        | <sup>176</sup> Hf/ <sup>177</sup> Hf<br>fstnorm | <sup>176</sup> Hf/ <sup>177</sup> Hf<br>orr 2SE | <sup>176</sup> Lu/ <sup>177</sup> Hf<br>orr        | <sup>176</sup> Lu/ <sup>177</sup> Hf<br>cor r 2SE | <sup>176</sup> Yb/ <sup>177</sup> Hf<br>orr | <sup>176</sup> Yb/ <sup>177</sup> Hf<br>cor r 2SE | <sup>178</sup> Hf/ <sup>177</sup> Hf<br>2SE | <sup>176</sup> Hf/ <sup>177</sup> Hf | t (age,<br>Ma) | εHf(0) | ±2 sigma | εHf(t) | TDM | TDM C* | TotalHfBe<br>am (V) |
|----------------------------------------|-------------------------------------------------|-------------------------------------------------|----------------------------------------------------|---------------------------------------------------|---------------------------------------------|---------------------------------------------------|---------------------------------------------|--------------------------------------|----------------|--------|----------|--------|-----|--------|---------------------|
| <sup>176</sup> Lu/ <sup>177</sup> HfDM |                                                 | 0.0384                                          | Blichert-Toft and Albarède, 1997                   |                                                   |                                             |                                                   |                                             |                                      |                |        |          |        |     |        |                     |
| <sup>176</sup> Hf/ <sup>177</sup> HfDM |                                                 | 0.28325                                         | Blichert-Toft and Albarède, 1997                   |                                                   |                                             |                                                   |                                             |                                      |                |        |          |        |     |        |                     |
| lambda (l)                             |                                                 | 1.87E-11                                        | Soderlund et al., 2004                             |                                                   |                                             |                                                   |                                             |                                      |                |        |          |        |     |        |                     |
| <sup>176</sup> Lu/ <sup>177</sup> HfC  |                                                 | 0.015                                           | Average intermediate crust. (Griffin et al., 2002) |                                                   |                                             |                                                   |                                             |                                      |                |        |          |        |     |        |                     |
